# Supplementary material for: Selective electrochemical nitrogen fixation to ammonia catalyzed by a novel microporous vanadium phosphonate via the distal pathway
Source: Royal Society of Chemistry journal article supplement (doi:10.1039/d4cc01045k), 2024-01-01
Supplement: d4cc01045k1.pdf [file d4cc01045k1.pdf]

## Supporting Information

### **Selective electrochemical nitrogen fixation to ammonia catalyzed by a novel microporous vanadium phosphonate via the distal pathway**

Smruti Vardhan Purohit,<sup>ab ‡</sup> Rupali Ipsita Mohanty,<sup>ab ‡</sup> Bibek Dash,<sup>a</sup> Piyali Bhanja<sup>\*a</sup> and Bikash Kumar Jena<sup>\*ab</sup>

<sup>a</sup>*CSIR-Institute of Minerals and Materials Technology, Bhubaneswar-751013, India*

<sup>b</sup>*Academy of Scientific and Innovative Research (AcSIR), Ghaziabad-201002, India*

<sup>‡</sup> *S.V. Purohit and R. I. Mohanty contributed equally to this work.*

*Corresponding author: piyalibhanja4@gmail.com, bikash@immt.res.in*

| <b>Title of the section</b>                                                                                                                                                                                                                                                                                                   | <b>Page number</b> |
|-------------------------------------------------------------------------------------------------------------------------------------------------------------------------------------------------------------------------------------------------------------------------------------------------------------------------------|--------------------|
| Experimental Section                                                                                                                                                                                                                                                                                                          | <b>S5</b>          |
| Synthesis method of microporous vanadium phosphonate (VPn)                                                                                                                                                                                                                                                                    | <b>S5</b>          |
| Electrochemical Measurements                                                                                                                                                                                                                                                                                                  | <b>S6</b>          |
| Computational Details                                                                                                                                                                                                                                                                                                         | <b>S7</b>          |
| Instrumentation                                                                                                                                                                                                                                                                                                               | <b>S7</b>          |
| Preparation of working electrode                                                                                                                                                                                                                                                                                              | <b>S8</b>          |
| Detection of NO <sub>x</sub> impurities in Ar, <sup>14</sup> N <sub>2</sub> , and <sup>15</sup> N <sub>2</sub> gas supplies                                                                                                                                                                                                   | <b>S9</b>          |
| Determination of produced ammonia                                                                                                                                                                                                                                                                                             | <b>S9</b>          |
| Determination of hydrazine                                                                                                                                                                                                                                                                                                    | <b>S11</b>         |
| Calculation of FE and yield rate of NH <sub>3</sub>                                                                                                                                                                                                                                                                           | <b>S11</b>         |
| <sup>15</sup> N <sub>2</sub> isotope labeling experiment                                                                                                                                                                                                                                                                      | <b>S12</b>         |
| The schematic representation of the synthesis route of VPn.                                                                                                                                                                                                                                                                   | <b>S12</b>         |
| Table S1: Indexing table for VPn.                                                                                                                                                                                                                                                                                             | <b>S13</b>         |
| Figure S1: EDS and elemental mapping analysis with corresponding TEM images of as-synthesized VPn material.                                                                                                                                                                                                                   | <b>S14</b>         |
| Figure S2: FTIR spectrum of VPn material.                                                                                                                                                                                                                                                                                     | <b>S15</b>         |
| Figure S3: Raman spectrum of VPn material.                                                                                                                                                                                                                                                                                    | <b>S16</b>         |
| Figure S4: Narrow range XPS spectrum of VPn containing elements V 2p, P 2p, O 1s, C 1s.                                                                                                                                                                                                                                       | <b>S17</b>         |
| Figure S5. Photograph of the experimental setup and electrochemical cell                                                                                                                                                                                                                                                      | <b>S18</b>         |
| Figure S6: UV-visible absorbance curves for standard nitrite, nitrate, and ammonia solutions with different concentrations and respective calibration curves obtained from the same.                                                                                                                                          | <b>S19</b>         |
| Figure S7: UV-visible absorbance curves for gas supplies (Ar, <sup>14</sup> N <sub>2</sub> , and <sup>15</sup> N <sub>2</sub> ) obtained before and after passing through alkaline KMnO <sub>4</sub> solution to trap NO <sub>x</sub> impurities and acid trap to test NH <sub>4</sub> <sup>+</sup> impurities, respectively. | <b>S20</b>         |
| Table S2: Summary of the gas impurity analysis by UV-visible spectroscopy (Quantified amounts of NO <sub>x</sub> /NH <sub>4</sub> <sup>+</sup> impurities before and after purification by scrubbing solution).                                                                                                               | <b>S21</b>         |
| Figure S8: UV-visible spectrum of the known standard solution of NH <sub>4</sub> Cl, Calibration plot for NH <sub>3</sub> detection, and Photograph of standard solutions of NH <sub>4</sub> Cl stained with Phenate method indicator after incubation in the dark for 2 h.                                                   | <b>S22</b>         |
| Figure S9: UV-visible spectrum of the known standard solution of NH <sub>4</sub> Cl, Calibration plot for NH <sub>3</sub> detection, and Photograph of standard solutions of NH <sub>4</sub> Cl stained with indophenol blue indicator after incubation in the dark for 2 h.                                                  | <b>S23</b>         |
| Figure S10: UV-visible spectrum of known standard solution of Hydrazine monohydrate, Calibration plot for N <sub>2</sub> H <sub>4</sub> detection, and Photograph of standard solutions of Hydrazine monohydrate stained with indicator after incubation in the dark for 30 min.                                              | <b>S24</b>         |
| Figure S11: UV-visible spectra of the stained electrolytes after 2 h electrolysis at different potentials by phenate and indophenol blue methods, respectively.                                                                                                                                                               | <b>S25</b>         |
| Figure S12: UV-visible spectra of resultant electrolytes after 2 h of electrolysis at different potentials stained with the indicator for hydrazine detection and Photograph of corresponding electrolytes stained with indicator after incubation in the dark for 30 min.                                                    | <b>S26</b>         |

|                                                                                                                                                                                                                                                                                                                                                                                                                                                                             |            |
|-----------------------------------------------------------------------------------------------------------------------------------------------------------------------------------------------------------------------------------------------------------------------------------------------------------------------------------------------------------------------------------------------------------------------------------------------------------------------------|------------|
| Figure S13: UV-visible spectra of the electrolyte after different control experiments (at open circuit potential (OCP), with Ar feed gas at -0.6 V for 7200 s on the VPn loaded CP (VPn/CP@-0.6V, Ar), with N <sub>2</sub> feed gas at -0.6 V for 7200 s on the bare Carbon paper (CP), and at -0.6 V with VPn modified CP in N <sub>2</sub> saturated electrolyte (VPn/CP@-0.6V, N <sub>2</sub> ) and Yield rate of NH <sub>3</sub> at four different control experiments. | <b>S27</b> |
| Figure S14: Chronoamperometry (i-t) curve of five consecutive cyclic tests of VPn at -0.6 V, UV-visible spectra of the stained electrolytes after 2 h electrolysis during five consecutive cyclic tests at -0.6 V by phenate method and indophenol blue method respectively, Yield rate of NH <sub>3</sub> and faradaic efficiency (FE) calculated for five consecutive cyclic tests of VPn at -0.6 V..                                                                     | <b>S28</b> |
| Figure S15: Long-term stability test of VPn over 15 h of electrochemical NRR.                                                                                                                                                                                                                                                                                                                                                                                               | <b>S29</b> |
| Figure S16: <sup>1</sup> H NMR qualitative and quantitative analysis after isotopic labeling experiments employed on VPn catalyst in the <sup>15</sup> N <sub>2</sub> and <sup>14</sup> N <sub>2</sub> as the feed gas.                                                                                                                                                                                                                                                     | <b>S30</b> |
| Figure S17: CV curves in the non-Faradaic region at various scan rates (10 to 200 mV s <sup>-1</sup> ) for VPn material in 0.1M Na <sub>2</sub> SO <sub>4</sub> and the corresponding fitted plot of scan rate vs. the anodic and cathodic current difference.                                                                                                                                                                                                              | <b>S31</b> |
| Figure S18: Nyquist plot for the electrochemical impedance measurements of the VPn material in N <sub>2</sub> and Ar saturated electrolyte at -0.6 V vs. RHE with a fitted equivalent circuit in the inset.                                                                                                                                                                                                                                                                 | <b>S32</b> |
| Figure S19: Zeta potential distribution curve for VPn material.                                                                                                                                                                                                                                                                                                                                                                                                             | <b>S33</b> |
| Figure S20: Surface contact angle measurement of VPn material.                                                                                                                                                                                                                                                                                                                                                                                                              | <b>S34</b> |
| Figure S21: FE-SEM images of VPn at different scales after durability test.                                                                                                                                                                                                                                                                                                                                                                                                 | <b>S35</b> |
| Figure S22: TEM images of VPn catalyst after durability test.                                                                                                                                                                                                                                                                                                                                                                                                               | <b>S36</b> |
| Figure S23: EDS and elemental mapping with corresponding TEM images of VPn catalyst after durability test.                                                                                                                                                                                                                                                                                                                                                                  | <b>S37</b> |
| Figure S24: Wide angle powder XRD pattern of the as-prepared VPn material after a long cycling test.                                                                                                                                                                                                                                                                                                                                                                        | <b>S38</b> |
| Figure S25: Raman spectrum of the as-prepared VPn material after a long cycling test.                                                                                                                                                                                                                                                                                                                                                                                       | <b>S39</b> |
| Figure S26: Narrow range XPS spectrum of VPn containing elements V 2p, P 2p, O 1s, C 1s, after long cycling test.                                                                                                                                                                                                                                                                                                                                                           | <b>S40</b> |
| Figure S27: DFT optimised structure of as-synthesized VPn.                                                                                                                                                                                                                                                                                                                                                                                                                  | <b>S41</b> |
| Figure S28: Optimized DFT structures of the as-prepared VPn material and all the intermediates involved in the NRR mechanism.                                                                                                                                                                                                                                                                                                                                               | <b>S42</b> |
| Table S3. Optimized coordinates of VPn material.                                                                                                                                                                                                                                                                                                                                                                                                                            | <b>S43</b> |
| Table S4. Optimized coordinates of *N <sub>2</sub>                                                                                                                                                                                                                                                                                                                                                                                                                          | <b>S44</b> |
| Table S5. Optimized coordinates of *NNH                                                                                                                                                                                                                                                                                                                                                                                                                                     | <b>S45</b> |
| Table S6. Optimized coordinates of *NHNH                                                                                                                                                                                                                                                                                                                                                                                                                                    | <b>S46</b> |
| Table S7. Optimized coordinates of *NHNH <sub>2</sub>                                                                                                                                                                                                                                                                                                                                                                                                                       | <b>S47</b> |
| Table S8. Optimized coordinates of *NH <sub>2</sub> NH <sub>2</sub>                                                                                                                                                                                                                                                                                                                                                                                                         | <b>S48</b> |
| Table S9. Optimized coordinates of *NNH <sub>2</sub>                                                                                                                                                                                                                                                                                                                                                                                                                        | <b>S49</b> |
| Table S10. Optimized coordinates of *N                                                                                                                                                                                                                                                                                                                                                                                                                                      | <b>S50</b> |
| Table S11. Optimized coordinates of *NH                                                                                                                                                                                                                                                                                                                                                                                                                                     | <b>S51</b> |
| Table S12. Optimized coordinates of *NH <sub>2</sub>                                                                                                                                                                                                                                                                                                                                                                                                                        | <b>S52</b> |
| Table S13. Optimized coordinates of *NH <sub>3</sub>                                                                                                                                                                                                                                                                                                                                                                                                                        | <b>S53</b> |
| Figure S29: Schematic diagram showing the two possible pathways (associative alternating and associative distal) involving all the DFT optimized structures for the electrochemical NRR over VPn catalyst.                                                                                                                                                                                                                                                                  | <b>S54</b> |

|                                                                                                                                                                                         |            |
|-----------------------------------------------------------------------------------------------------------------------------------------------------------------------------------------|------------|
| Figure S30: Projected density of states (PDOS) of N <sub>2</sub> and V 3d orbitals before and after N <sub>2</sub> adsorption near the Fermi level when the Fermi level is set to zero. | <b>S55</b> |
| Importance and performance of the vanadium phosphonate with respect to the vanadium oxides, phosphides, and sulfides.                                                                   | <b>S56</b> |
| Table S14: Performance of other vanadium-based electrocatalysts as compared to VPn.                                                                                                     | <b>S58</b> |
| Table S15: Comparison table with recently reported NRR electrocatalyst.                                                                                                                 | <b>S59</b> |
| References                                                                                                                                                                              | <b>S61</b> |

## Experimental Section

**Chemicals:** Phenylphosphinic acid ( $M = 142.09$  g/mol) and vanadium (III) chloride ( $M = 157.30$  g/mol) were purchased from Sigma Aldrich India. Aqueous ammonium hydroxide (25 wt%) solution was received from Merck to maintain the pH of the reaction mixture. Sodium sulfate was purchased from Alfa-Aesar, Phenol, 4-Dimethylaminobenzaldehyde, and Hydrazine monohydrate was obtained from TCI. Sodium nitroferricyanide (III) dihydrate, Trisodium citrate, Salicylic acid, sulphanilamide, N-(1-naphthyl) ethylenediamine dihydrochloride and Sodium hypochlorite solution were received from Sigma-Aldrich, India. Sodium hydroxide, HCl, Potassium nitrate, Sodium nitrite, and Ammonium chloride were purchased from HIMEDIA. Other organic solvents were used as received. Nafion-117 membrane, Nafion solution, Dimethyl sulfoxide-D6, Deuterium oxide, and  $^{15}\text{NH}_4\text{Cl}$  were purchased from Sigma-Aldrich, India.  $\text{N}_2$  (99.999%) and Ar (99.999%) gases are obtained from Biosciences. Other organic solvents were also obtained from Merck and used for washing without any purification. Purchased Chemicals were used without further purification. Deionized water was used throughout the experiment.

### Synthesis method of microporous Vanadium phosphonate:

To synthesize the microporous vanadium phosphonate, 1 mmol (142 mg) of phenylphosphinic acid, an organophosphorus ligand, was dissolved in 7 mL of distilled water. After 5 minutes of continuous stirring, an aqueous solution of 2 mmol (314 mg) vanadium (III) chloride was mixed with the transparent acidic solution mixture and allowed to stir vigorously for 30 minutes. Then, an aqueous ammonia solution was added dropwise during continuous stirring to maintain the pH of the reaction mixture to 6.5. The final homogeneous gel was obtained after 2 h of vigorous stirring and poured into the Teflon-lined stainless-steel autoclave at  $160^\circ\text{C}$  for 48 hours. After completion, the solid dark green coloured product was collected through

the centrifugation technique and washed properly with distilled water, followed by ethanol to remove unreacted substances from the material surface. The product was dried overnight in a vacuum oven at 70 °C and named as VPn. The collected sample has been subjected to thorough characterization and electrochemical measurements. **Scheme S1** represents the outline for vanadium phosphonate (VPn) synthesis under hydrothermal reaction conditions.

### **Electrochemical Measurements:**

The electrochemical NRR measurements were carried out at room temperature on a CHI-760D workstation (CH-Instrument) in a standard three-electrode system using modified carbon paper as the working electrode, graphite rod as the counter electrode and Ag/AgCl electrode as the reference electrode. An H-shaped electrochemical cell was used for all the electrochemical experiments. The Nafion-117 membrane was introduced between the two compartments as a separator, and 40 ml of 0.1M Na<sub>2</sub>SO<sub>4</sub> was taken as a working electrolyte in each chamber. Before electrochemical testing, the Nafion-117 membrane was pre-treated by heating successively in 5% H<sub>2</sub>O<sub>2</sub> solution, 0.5 M H<sub>2</sub>SO<sub>4</sub>, and ultrapure water at 80 °C for 1.5 h. Purified N<sub>2</sub>(99.999%) and Ar(99.999%) feed gases were used during the experiments, and the purification was done using an alkaline KMnO<sub>4</sub> trap and dilute acid traps to remove any impurities and contamination as per the reported protocol.<sup>1-3</sup> Before any electrochemical experiment, purified Ar/N<sub>2</sub> gas was passed through the cathodic chamber for at least 30 minutes and then was continuously bubbled at a constant rate throughout the chronoamperometric experiments. The potentials reported in this work were converted to the RHE scale via calibration with the following equation:  $E \text{ (vs. RHE)} = E \text{ (vs Ag/AgCl)} + 0.197 + 0.059 \times \text{pH}$ . The LSV curves were obtained at a scan rate of 5 mVs<sup>-1</sup> with IR compensation at room temperature. The Chronoamperometry tests at different applied voltages were performed with continuous magnetic bead stirring at 350 rpm for 2 h to reduce nitrogen under ambient conditions. Cyclic Voltammetry (CV) has been taken at various scan rates (10, 20, 40, 60, 80,

100, 150, and 200 mV/s) in the non-faradic potential range of 0.74-0.84 V vs. RHE and is used to estimate the double-layer capacitance (Cdl). The electrochemical impedance spectroscopy (EIS) measurement of the phosphonate sample was performed in the frequency range of 10<sup>-5</sup> to 0.1 Hz in the Ar and N<sub>2</sub>-saturated 0.1 M Na<sub>2</sub>SO<sub>4</sub> solution at -0.6 V vs. RHE.

### **Computational Details:**

DFT calculations were performed using the linear combination of atomic orbitals (LCAO) method as implemented in the Quantum ATK (Synopsys, USA) package.<sup>4</sup> The exchange-correlation of electrons was included using the Generalized Gradient Approximation (GGA) of the Perdew-Burke-Ernzerhof (PBE) correlation function.<sup>5</sup> The van der Waals interactions were taken care of using DFT-D2 of Grimme's method.<sup>6</sup> Brillouin zone is sampled using a Monkhorst-Pack mesh of 9x9x9 k-points for all the geometry optimization and electronic structure calculations.<sup>7</sup> The convergence criteria of 10<sup>-5</sup> eV and 10<sup>-2</sup> eV Å<sup>-1</sup> are used for the energy and forces until all geometrical structures are relaxed.

The Gibbs free energy change ( $\Delta G$ ) in each hydrogenation step involved in the electrochemical NRR process was obtained by following the computational hydrogen electrode (CHE) model proposed by Nørskov et al.<sup>8</sup> Based on the above model,  $\Delta G$  values can be calculated by the following equation [Eq. (1)];  $\Delta G = \Delta E + \Delta ZPE - T\Delta S$  (1)

Where  $\Delta E$  is the adsorption energy calculated by DFT,  $\Delta ZPE$ , and  $T\Delta S$  are the changes in the zero-point energies and the entropy, respectively, at the room temperature ( $T = 298.15$  K).

$\Delta E$  can be calculated by the following equation [Eq. (2)];  $\Delta E = E^*_{\text{ads}} - E_{\text{ads}} - E^*$  (2)

$E^*_{\text{ads}}$ ,  $E_{\text{ads}}$ , and  $E^*$  are the total energies for adsorbed species on the catalyst, adsorbed species, and isolated catalyst. The experimental data at 298.15 K were taken from the NIST database for the gaseous molecules.

### **Instrumentation:**

Rigaku RINT 2500X diffractometer with monochromated Cu K $\alpha$  radiation (40 kV, 40 mA) at a scan rate of 0.1° min<sup>-1</sup> has been utilized to analyze the wide-angle powder X-ray diffraction (XRD) pattern for the as-synthesized materials. Unit cell parameters of the vanadium phosphonate were obtained from the EXPO 2014 software with the built-in Rietveld refinement of the experimental powder XRD data.<sup>9</sup> The FT-IR spectrum of the VPn was recorded using Thermo Scientific Nicolet 4700 spectrometer, where the KBr pellet was used as a background reference. The nitrogen sorption isotherm and the pore size diameter of the as-prepared sample were measured by the Quantachrome Autosorb after degassing the sample at 150 °C for 8 h. The scanning electron microscope (SEM) images of the material were observed from Hitachi SU-8000 SEM, where the accelerating voltage was 15 kV. The TEM images and elemental mapping for all samples were taken by an FEI F20 FEG-STEM instrument after drop-casting the sample onto the copper grid. To analyze the oxidation states of the metal centre of as-prepared three metal phosphonate materials, the X-ray photoelectron spectroscopy technique was used with Kratos Axis Ultra XPS. A UV-visible spectrophotometer (UV-2600, Shimadzu) was utilized to record the UV-visible spectra. Contact angle measurement was recorded using a Phoenix multi-water contact instrument. Zeta potential measurement was done using the Litesizer 500 (Anton Paar) instrument. <sup>1</sup>H NMR spectra were recorded on a Jeol NMR spectrometer (400 MHz) for the isotope labeling experiment. The Raman spectrum of the VPn was recorded using a Renishaw microscopic confocal Raman spectrometer with a laser wavelength of 532 nm.

**Preparation of working electrode:**

To prepare the working electrode, 1 mg of the as-prepared material was suspended in 195  $\mu$ L of ethanol and 5  $\mu$ L of 5% Nafion solution. The resulting suspension was sonicated for 1 hour to get a homogeneous ink. Then 100  $\mu$ L of the so prepared ink was drop-casted onto a carbon paper (1 cm  $\times$  1 cm) and was dried under ambient conditions.



**Detection of NO<sub>x</sub> impurities in Ar, <sup>14</sup>N<sub>2</sub>, and <sup>15</sup>N<sub>2</sub> gas supplies:**

Griess spectrophotometric assay was applied to quantify the amount of NO<sub>x</sub> contaminants.<sup>1-3</sup>

Griess reagents and reducing agent solution were freshly prepared and stored in the refrigerator (ca 4 °C) in the dark. The life cycle of the testing kit was estimated to be not more than 4 weeks for reliable results. Diazotising reagent was obtained by adding 0.1 g sulphanilamide (SULF) and 1 mL concentrated HCl to the total volume of 10 mL with water in a volumetric flask. A coupling reagent was prepared by dissolving 0.01 g of N-(1-naphthyl) ethylenediamine dihydrochloride (NED) in 10 mL water. In a volumetric flask, the reducing agent solution was dissolved by 0.5 g VCl<sub>3</sub> in 25 mL of 6 M HCl(aq.). After adding VCl<sub>3</sub>, the mixture was kept in the dark for 1 h before being filtered and transferred into an amber bottle.

In the standard testing protocol, 1000 μL of the sample was taken, and 50 μL of pre-mixed solution of SULF and NED (1:1 vol.) was added to it. After that, the obtained mixture was incubated under ambient conditions for 20 min. Then, the UV–vis spectrum in a 400–800 nm range was recorded to detect NO<sub>2</sub><sup>-</sup>. For nitrate analysis, 50 μL of reducing agent solution was added to the above mixture and kept at 60 °C (water bath) for 25 min. Finally, the solution was cooled down to room temperature and analyzed by UV–vis again within the same wavelength range. The concentrations of nitrite and nitrate as a function of the absorbance value at the wavelength of 540 nm were calculated by using calibration plots constructed with standard NaNO<sub>2</sub> and KNO<sub>3</sub> solutions.

**Determination of produced ammonia (NH<sub>3</sub>):****Phenate Method:****Stock Reagents:**

1. Phenol solution: 5 g phenol was dissolved in 50 mL 95% ethanol;

2. Sodium nitroferricyanide solution: 0.25 g Sodium nitroferricyanide (III) dihydrate was dissolved in 50 mL Millipore water;
3. Alkaline complexing reagent: 20 g trisodium citrate and 1 g sodium hydroxide were dissolved in 100 mL Millipore water;
4. Sodium hypochlorite solution
5. Oxidizing solution: 6 mL alkaline solution (3) was added to 1.5 mL sodium hypochlorite solution (4).

The concentration of ammonia produced in the electrolyte after the 2-hour electrolysis was measured using the phenate method. In detail, 5 mL of the electrolyte after N<sub>2</sub> reduction for 2 hours was added into 0.2 mL of phenol solution (1), then added 0.2 mL of Sodium nitroferricyanide solution (2), and finally added to 0.5 mL of oxidizing solution (5). The Ultraviolet-Visible absorption spectra were recorded after the above mixture was stored in darkness for 2 hours, which exhibited an absorption peak at 640 nm for the blue-colored solutions.

For the concentration-absorbance calibration curve, the standard ammonium chloride solution (0.1 M Na<sub>2</sub>SO<sub>4</sub> as mother solution) with a series of concentrations (0, 0.1, 0.2, 0.4, 0.6, 0.8, and 1 µg. mL<sup>-1</sup>) were prepared, and the concentration was determined by the phenate method using the absorbance at a wavelength of 640 nm. The fitting curve ( $y = 0.97592x + 0.01052$ ,  $R^2 = 0.999$ ) shows a good linear relation of absorbance value with NH<sub>4</sub>Cl concentration.

#### **Indophenol Blue Method:**

The concentration of the ammonia produced via the electrocatalytic NRR was determined using the indophenol blue method. In detail, 2 mL of the post-NRR electrolyte was removed from the cathodic chamber and added into 2 mL NaOH solution (1 M) containing 5 wt% salicylic acid and 5 wt% sodium citrate, then followed by the addition of 1 mL NaClO (0.05 M) and 0.2 mL C<sub>5</sub>FeN<sub>6</sub>Na<sub>2</sub>O (sodium nitroferricyanide) aqueous solution (1wt%). After standing in

darkness for 2 hours, the absorption spectrum was measured using a UV-vis spectrophotometer. The formation of indophenol blue was determined using the absorbance at a wavelength of 655 nm.

For the concentration-absorbance calibration curve, the standard ammonium chloride solution (0.1 M  $\text{Na}_2\text{SO}_4$  as mother solution) with a series of concentrations (0, 0.1, 0.2, 0.4, 0.6, 0.8, and 1  $\mu\text{g}\cdot\text{mL}^{-1}$ ) were prepared. The concentration was determined by the above indophenol method using the absorbance at a wavelength of 655 nm. The fitting curve ( $y = 0.39183x + 0.03276$ ,  $R^2 = 0.999$ ) shows a good linear relation of absorbance value with  $\text{NH}_4\text{Cl}$  concentration. Also, for the adventitious ammonia impurity analysis, the standardisation and the quantification of contamination in the gas supplies were done using this method.

#### **Determination of hydrazine ( $\text{N}_2\text{H}_4$ ) by Watt–Chrisp method:**

The concentration of hydrazine in the electrolyte after the 2-hour electrolysis was determined by the Watt and Chrisp method. In detail, a mixture of ethanol (30mL), HCl (concentrated, 3 mL), and 4-dimethylaminobenzaldehyde (0.599 g) was prepared as a colour reagent. 2 ml of the above colour reagent was added to 2 mL of the electrolyte after 2-hour electrolysis. The Ultraviolet-Visible absorption spectra were recorded after the above mixture was stored in darkness for 30 minutes, which exhibited an absorption peak at 455 nm.

For the concentration-absorbance calibration curve, the standard hydrazine monohydrate solution (0.1 M  $\text{Na}_2\text{SO}_4$  as mother solution) with a series of concentrations (0, 0.1, 0.2, 0.4, 0.6, 0.8, and 1  $\mu\text{g}\cdot\text{mL}^{-1}$ ) were prepared. The concentration was determined by the Watt and Chrisp method using the absorbance at a wavelength of 455 nm. The fitting curve ( $y = 0.52645x + 0.00514$ ,  $R^2 = 0.996$ ) shows a good linear relation of absorbance value with  $\text{N}_2\text{H}_4$  concentration.

#### **Calculation of FE and yield rate of $\text{NH}_3$ :**

$\text{NH}_3$  yield rate can be calculated as follows:

$$V_{\text{NH}_3} (\mu\text{g h}^{-1} \text{m}_{\text{cat}}^{-1}) = \frac{C_{\text{NH}_3} \times V_{\text{electrolyte}}}{t \times m_{\text{cat}}}$$

Faradic efficiency can be calculated as follows:

$$\text{FE (\%)} = \frac{3 \times F \times C_{\text{NH}_3} \times V_{\text{electrolyte}}}{17 \times Q} \times 100$$

Where, constant 3 is the transfer electron number of produced  $\text{NH}_3$ ,  $C_{\text{NH}_3}$  ( $\mu\text{g mL}^{-1}$ ) is the concentration of produced  $\text{NH}_3$ ,  $V_{\text{electrolyte}}$  (40 mL in our work) is the volume of the electrolyte,  $F$  ( $96485 \text{ C mol}^{-1}$ ) is the Faraday constant, constant 17 is the molar mass of  $\text{NH}_3$ ,  $Q$  (C) amount of electricity consumed in the electrolysis process,  $t$  (=2 h) is the time for electrolysis and  $m_{\text{cat}}$  is the loading mass of electrocatalyst (0.5 mg).

#### **$^{15}\text{N}_2$ isotope labeling experiment:**

$^{15}\text{N}_2$  (98 atom %  $^{15}\text{N}$ , purchased from Sigma-Aldrich) served as feeding gas for the isotopic labeling experiment. The gas purification (with alkaline  $\text{KMnO}_4$  trap and dilute acid traps) and electrochemical experiments were the same as the measurements in  $^{14}\text{N}_2$ . The chronoamperometry tests were performed at -0.6 V vs. RHE in 0.1 M  $\text{Na}_2\text{SO}_4$ . To prepare the NMR sample, 10  $\mu\text{L}$  of 0.5 M  $\text{H}_2\text{SO}_4$  was added into 600  $\mu\text{L}$  electrolyte, followed by 70  $\mu\text{L}$   $\text{D}_2\text{O}$  and 30  $\mu\text{L}$  dimethyl sulfoxide.<sup>10</sup> The above solution was subjected to  $^1\text{H}$  nuclear magnetic resonance analysis. The calibration curves were obtained from  $^1\text{H}$  NMR spectrum of standard

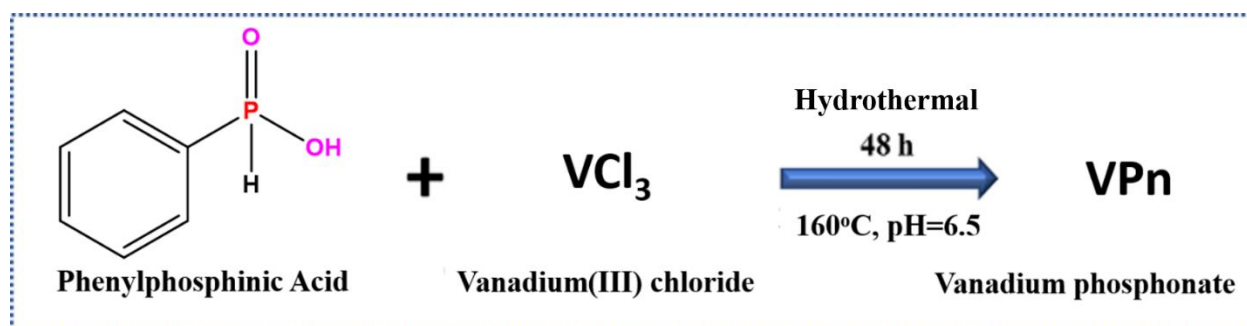

$^{14}\text{NH}_4\text{Cl}$  and  $^{15}\text{NH}_4\text{Cl}$  solutions of different concentrations (0 -2.5  $\mu\text{g mL}^{-1}$ ).

**Scheme S1.** The schematic representation of the synthesis route of VPn.

**Table S1: Indexing table for VPn:****Cell parameters****a = 15.37346    b = 12.47406    c = 9.89154** **$\alpha = 90.000$      $\beta = 93.587$      $\gamma = 90.000$** **Cell volume: 1893.18 Å<sup>3</sup>,    crystal unit cell structure: tetrahedral**

| <i>h</i> | <i>k</i> | <i>l</i> | <i>2<math>\theta</math></i> | <i>d</i> |
|----------|----------|----------|-----------------------------|----------|
| 1        | 0        | 0        | 5.75525                     | 15.34334 |
| 0        | 0        | 1        | 8.95016                     | 9.87216  |
| 2        | 0        | 0        | 11.52507                    | 7.67167  |
| 1        | 2        | -1       | 17.58709                    | 5.03864  |
| 1        | 2        | 1        | 17.95518                    | 4.93617  |
| 0        | 0        | 2        | 17.95551                    | 4.93608  |
| 2        | 2        | 0        | 18.31699                    | 4.83947  |
| 1        | 1        | 2        | 20.50061                    | 4.32866  |
| 2        | 2        | 1        | 20.74024                    | 4.27919  |
| 3        | 1        | 1        | 21.26852                    | 4.17407  |
| 1        | 2        | -2       | 23.40625                    | 3.79746  |
| 3        | 2        | 1        | 24.63085                    | 3.61136  |
| 2        | 3        | -1       | 25.71204                    | 3.46190  |
| 3        | 0        | 2        | 25.83565                    | 3.44562  |
| 4        | 1        | 1        | 26.41110                    | 3.37184  |
| 3        | 2        | 2        | 29.59445                    | 3.01599  |
| 0        | 2        | 3        | 30.69337                    | 2.91046  |
| 2        | 3        | 2        | 30.84298                    | 2.89669  |
| 3        | 3        | -2       | 32.52293                    | 2.75079  |
| 1        | 5        | 0        | 36.45702                    | 2.46247  |
| 6        | 0        | 2        | 40.70587                    | 2.21471  |
| 5        | 4        | 0        | 41.23927                    | 2.18729  |
| 3        | 4        | 3        | 44.42178                    | 2.03769  |
| 7        | 0        | -4       | 54.15154                    | 1.69230  |
| 2        | 0        | 6        | 58.01224                    | 1.58852  |

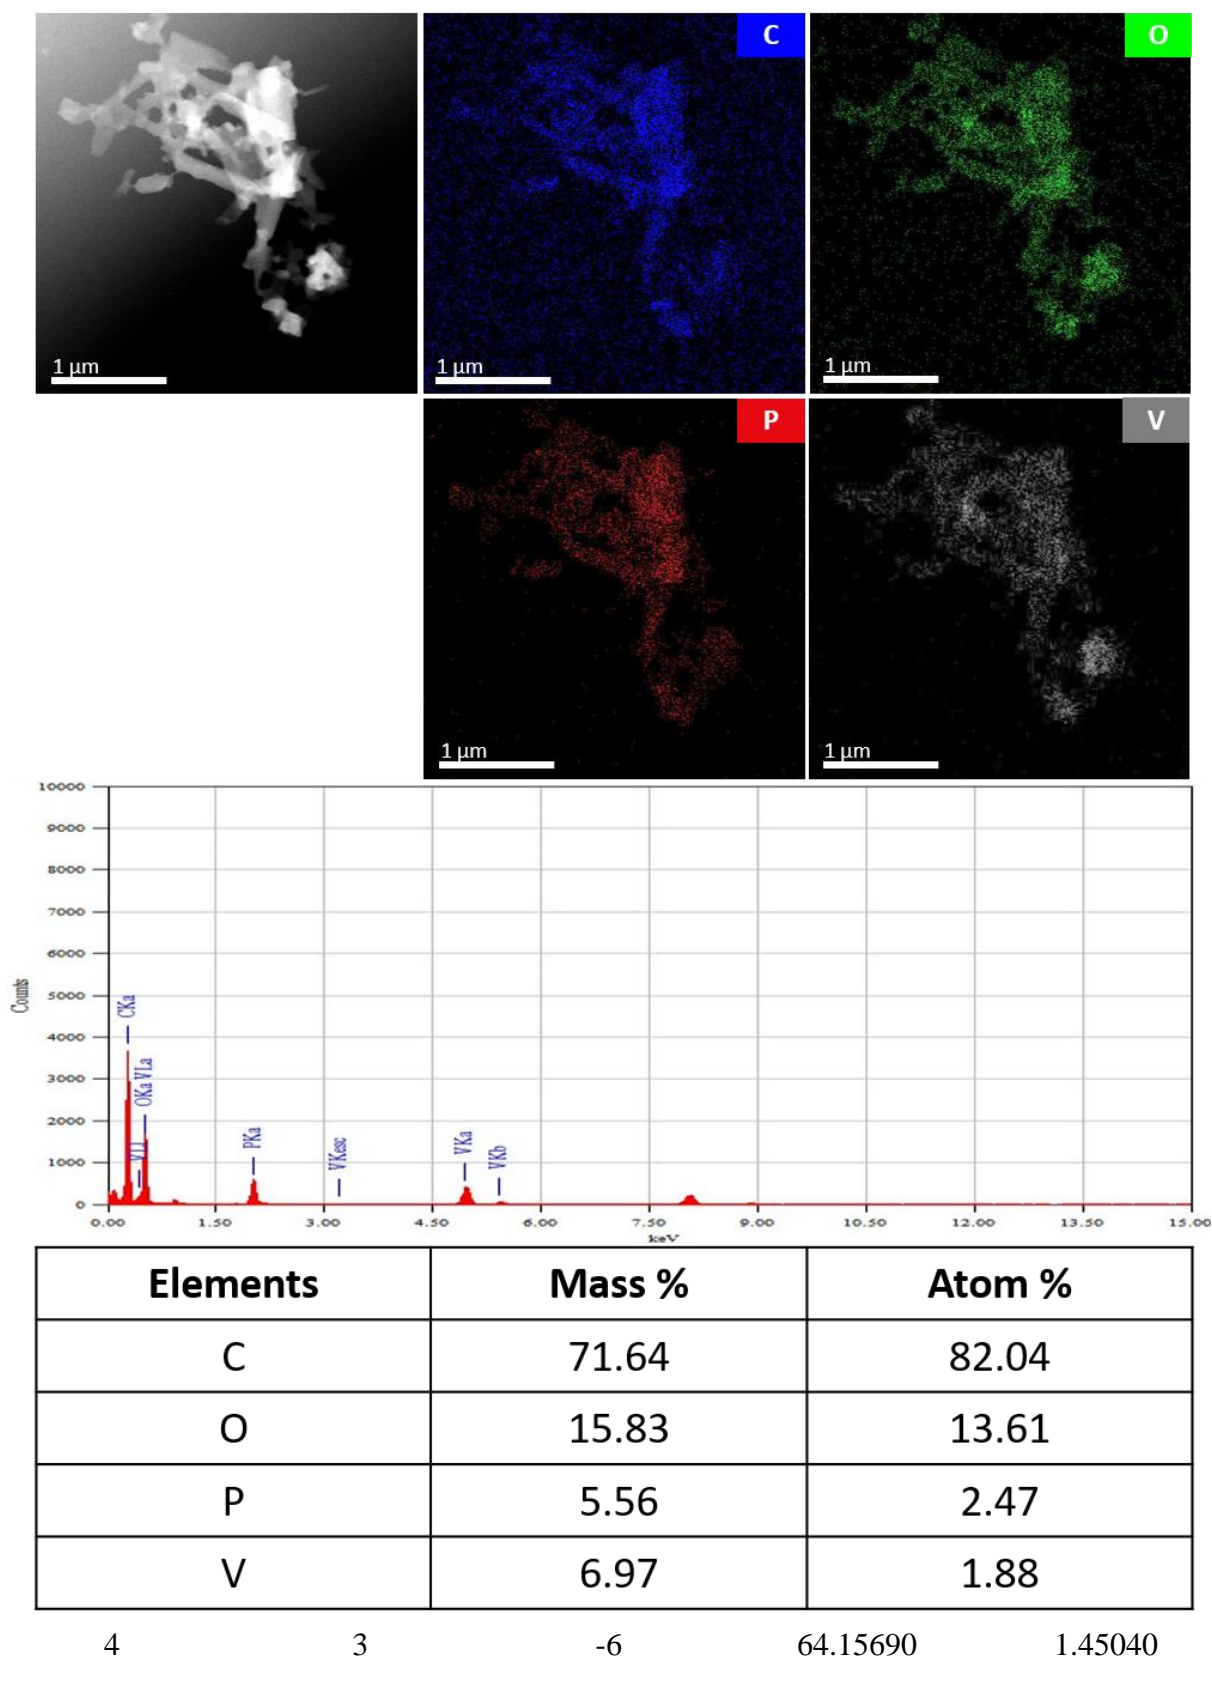

**Figure S1.** EDS and elemental mapping analysis with corresponding TEM images of as-synthesized VPn material.

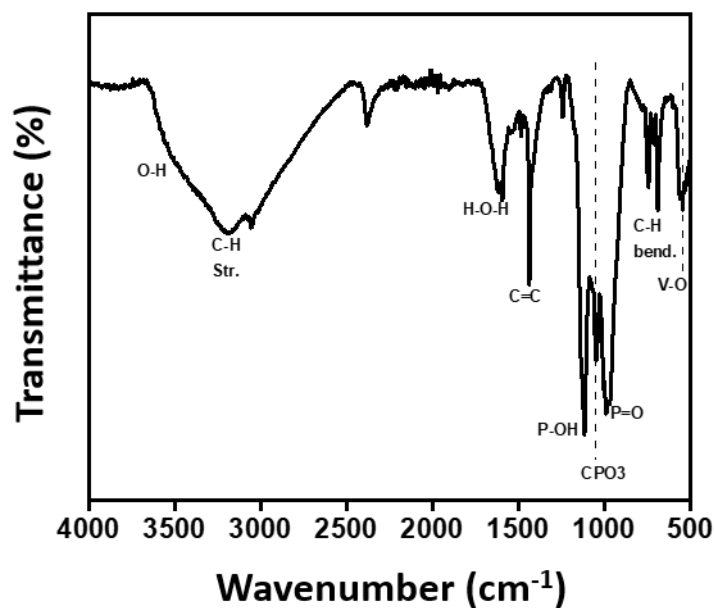

**Figure S2.** FTIR spectrum of VPn material.

The characteristic signals corresponding to -OH groups, the ring containing C-H groups, water molecules containing H-O-H groups, and C=C groups can be found. The three characteristic peaks at 1124, 1055, and 972  $\text{cm}^{-1}$  can be attributed to the phosphonate group containing P-OH,  $\text{CPO}_3$ , and P=O groups, respectively. Also, the sharp signals observed at 698  $\text{cm}^{-1}$  and 558  $\text{cm}^{-1}$  are ascribed repetitively as the C-H bending vibration and stretching vibration of V-O bonds.<sup>11,12</sup>

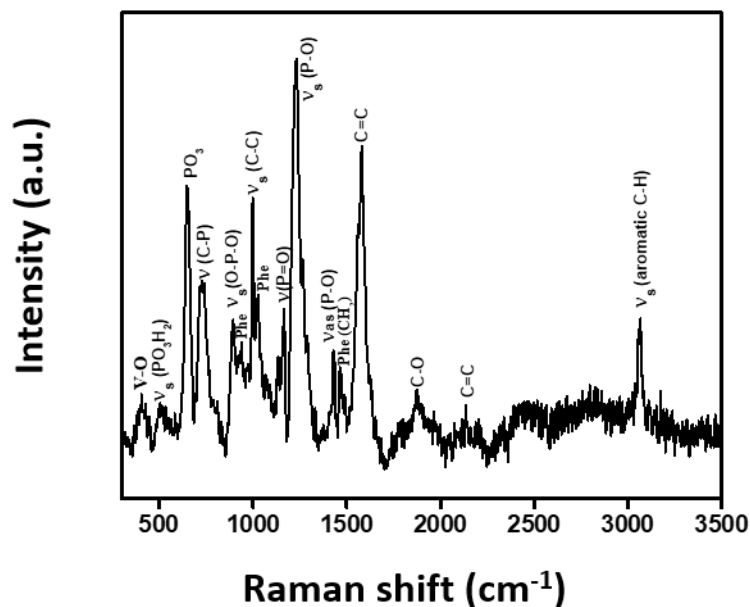

**Figure S3.** Raman spectrum of VPn material.

The peak at  $3070\text{ cm}^{-1}$ ,  $1228.6\text{ cm}^{-1}$ , and  $653\text{ cm}^{-1}$  is due to the aromatic C-H group's symmetric stretching vibration ( $\nu_s$ ), the  $\nu_s(\text{P-O})$  bond and the presence of a connected  $\text{PO}_3$  group respectively. The respective asymmetric stretching vibration ( $\nu_{as}$ ) of the P-O bond was observed at  $1284$  and  $1427\text{ cm}^{-1}$ . Also, the peak at  $408\text{ cm}^{-1}$  arises due to the  $\nu_s(\text{PO}_3\text{H}_2)$  group, signifying the presence of the a phosphonate group in the matrix. The Raman band at  $404.5\text{ cm}^{-1}$  can be attributed to the metal-oxygen bond, bands at  $936.3\text{ cm}^{-1}$  and  $1030\text{ cm}^{-1}$  correspond to different vibration modes of the phenyl group. The bands at  $1165.8\text{ cm}^{-1}$ ,  $1468.5\text{ cm}^{-1}$  and  $1871.7\text{ cm}^{-1}$  corresponds to vibration modes of P=O, phenyl ( $\text{CH}_2$ ) and C-O group respectively. Other peaks at  $997\text{ cm}^{-1}$  and  $1030\text{ cm}^{-1}$  indicate the vibrational modes for the phenyl ring present in the organophosphorus ligand.<sup>13</sup>



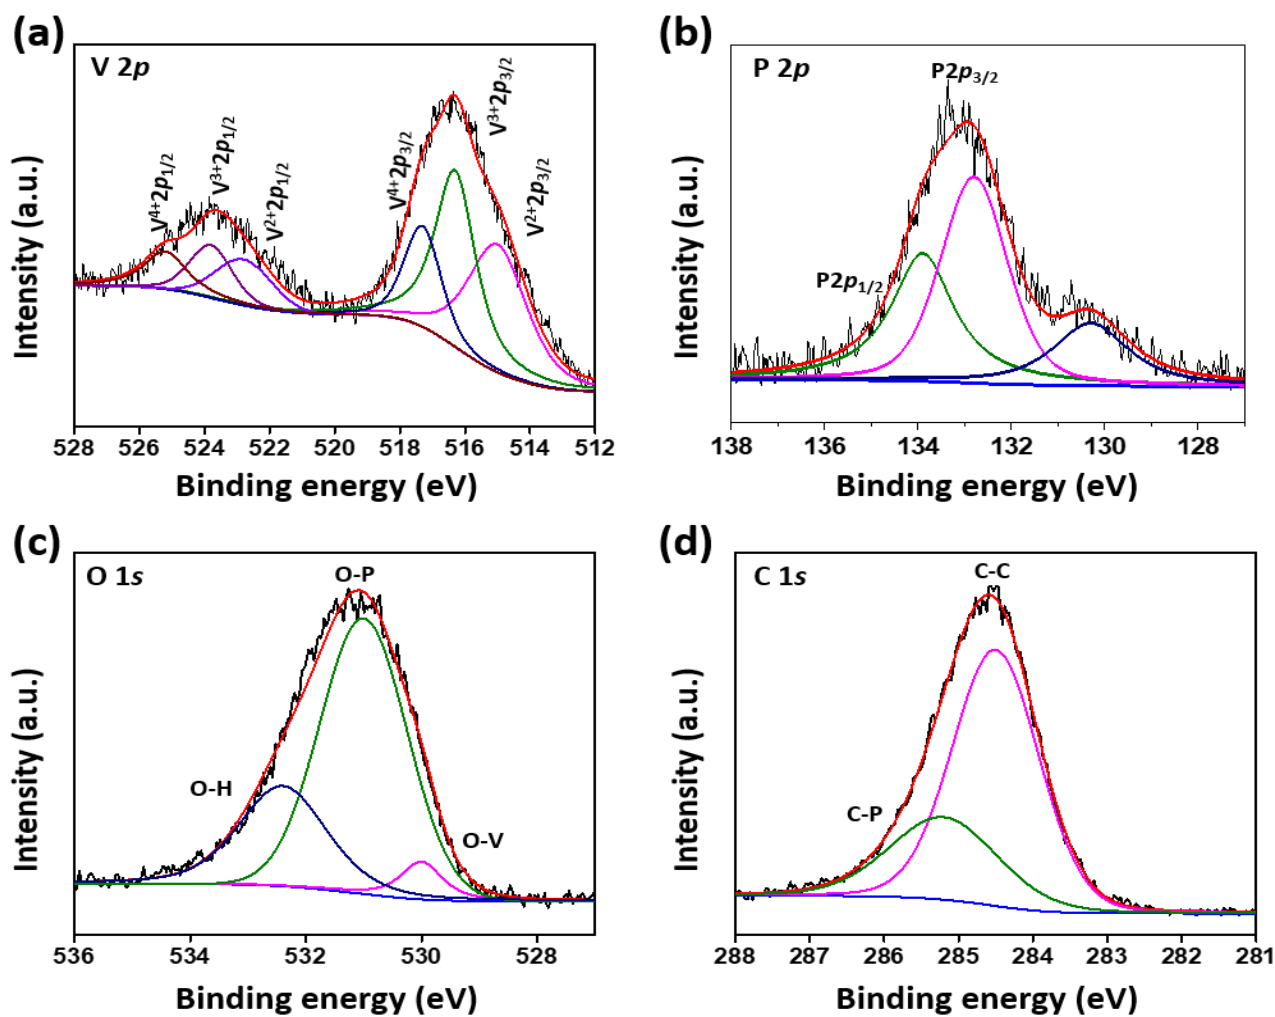

**Figure S4.** Narrow range XPS spectrum of VPn containing elements (a) V 2p, (b) P 2p, (c) O 1s, (d) C 1s.

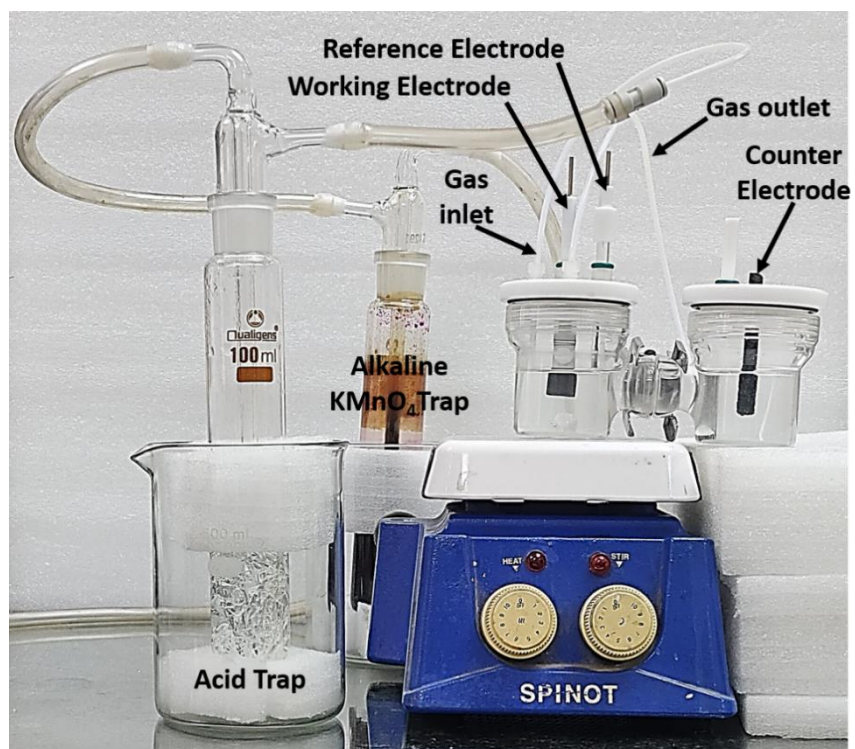

**Figure S5.** Photograph of the experimental setup and electrochemical cell.

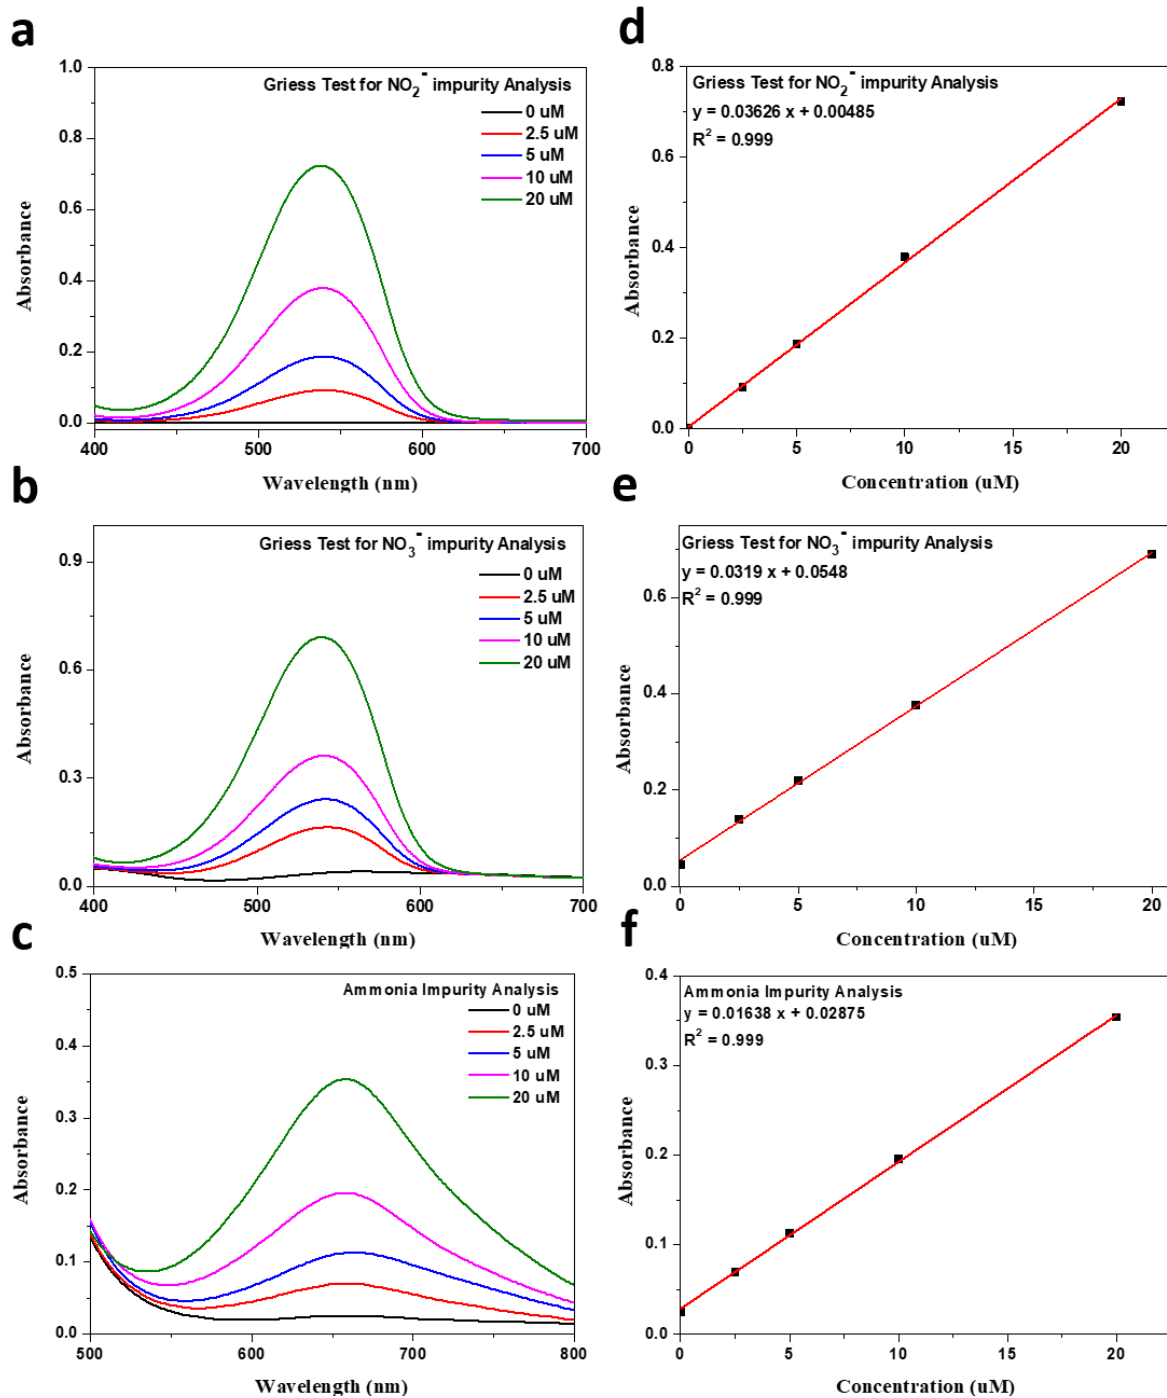

**Figure S6.** UV-visible absorbance curves for standard (a) nitrite, (b) nitrate, and (c) ammonia solutions with different concentrations and (d-f) respective calibration curves obtained from the same.

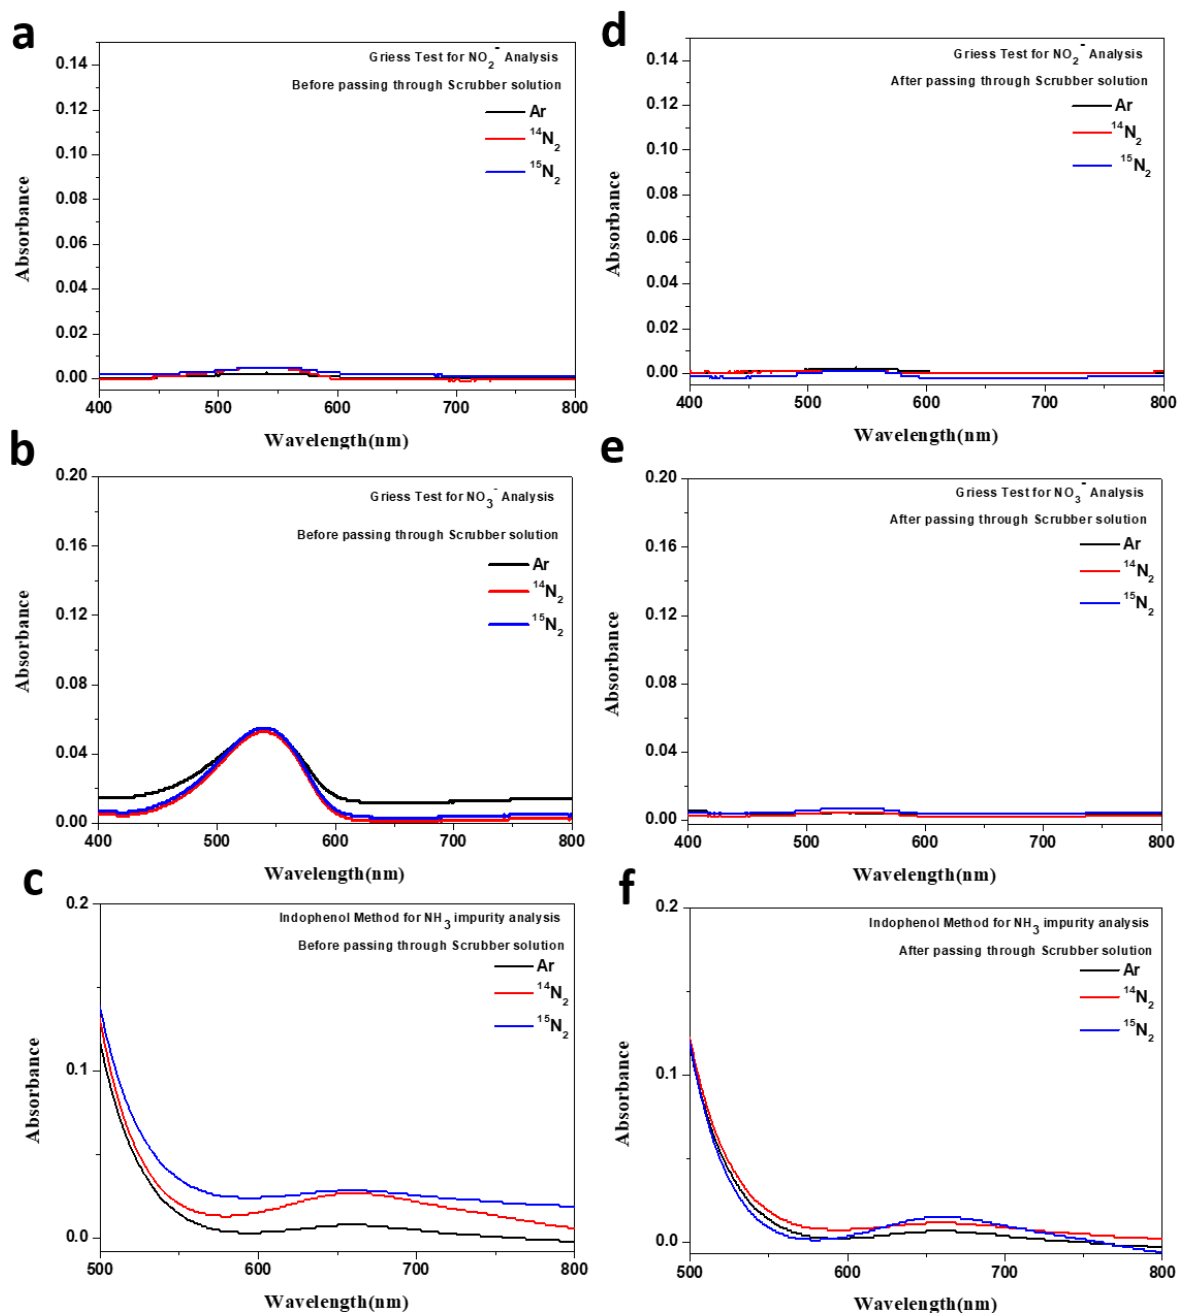

**Figure S7.** UV-visible absorbance curves for gas supplies (Ar,  $^{14}\text{N}_2$ , and  $^{15}\text{N}_2$ ) obtained (a-c) before and (d-f) after passing through alkaline  $\text{KMnO}_4$  solution to trap  $\text{NO}_x$  impurities and acid trap to test  $\text{NH}_4^+$  impurities, respectively.

| Gas Supplies                 | Before Purification                  |                                      |                                      | After Purification                   |                                      |                                      |
|------------------------------|--------------------------------------|--------------------------------------|--------------------------------------|--------------------------------------|--------------------------------------|--------------------------------------|
|                              | NO <sub>2</sub> <sup>-</sup><br>(μM) | NO <sub>3</sub> <sup>-</sup><br>(μM) | NH <sub>4</sub> <sup>+</sup><br>(μM) | NO <sub>2</sub> <sup>-</sup><br>(μM) | NO <sub>3</sub> <sup>-</sup><br>(μM) | NH <sub>4</sub> <sup>+</sup><br>(μM) |
| Ar                           | -                                    | 0.002                                | -                                    | -                                    | <0.001                               | -                                    |
| <sup>14</sup> N <sub>2</sub> | 0.002                                | 0.003                                | 0.006                                | <0.001                               | <0.001                               | <0.001                               |
| <sup>15</sup> N <sub>2</sub> | 0.002                                | 0.004                                | 0.007                                | <0.001                               | <0.001                               | <0.001                               |

**Table S2.** Summary of the gas impurity analysis by UV-visible spectroscopy (Quantified amounts of NO<sub>x</sub>/NH<sub>4</sub><sup>+</sup> impurities before and after purification by scrubbing solution).

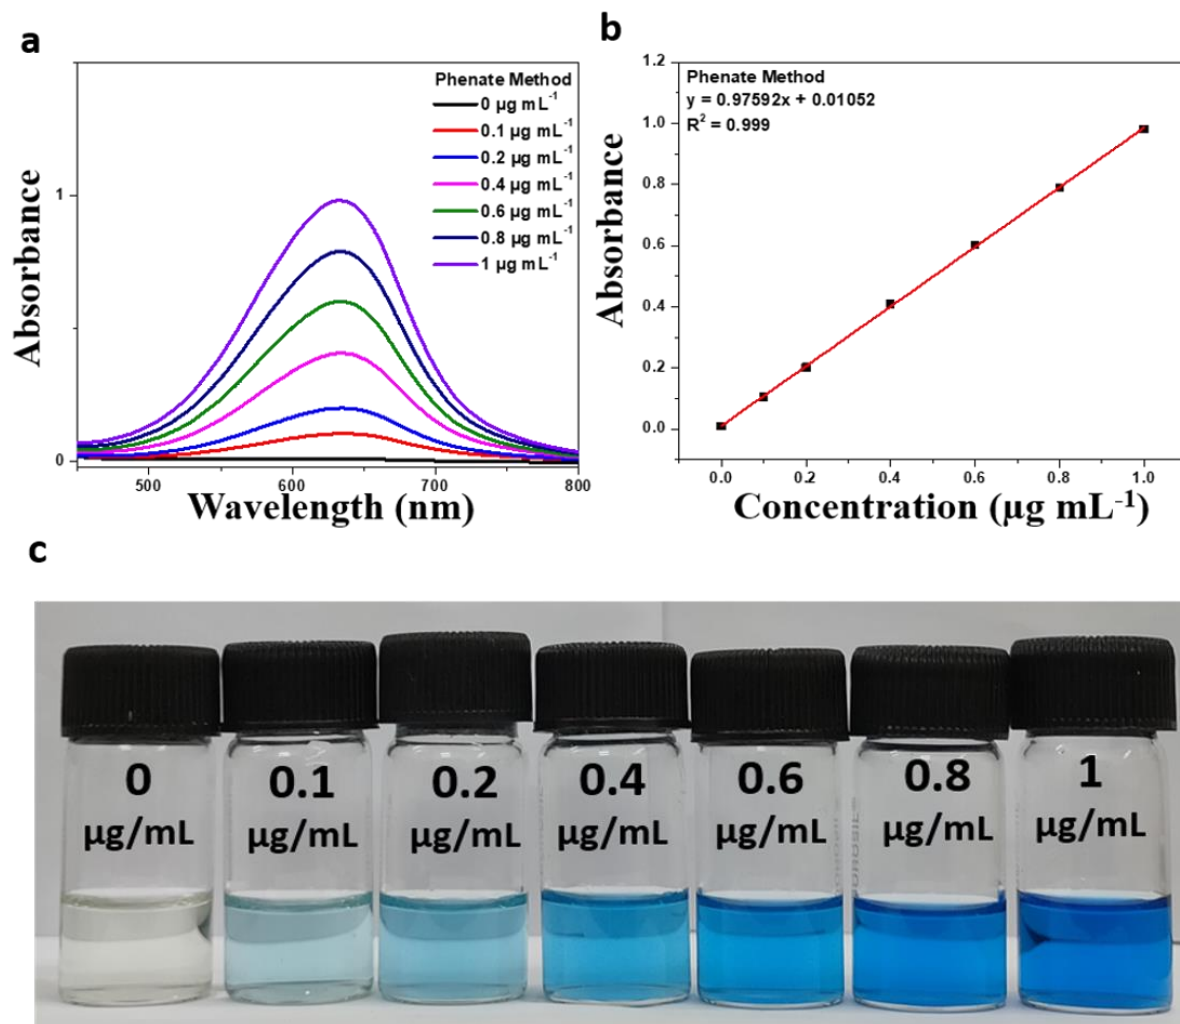

**Figure S8.** (a) UV-visible spectrum of the known standard solution of  $\text{NH}_4\text{Cl}$ , (b) Calibration plot for  $\text{NH}_3$  detection, (c) Photograph of standard solutions of  $\text{NH}_4\text{Cl}$  stained with Phenate method indicator after incubation in the dark for 2 h.

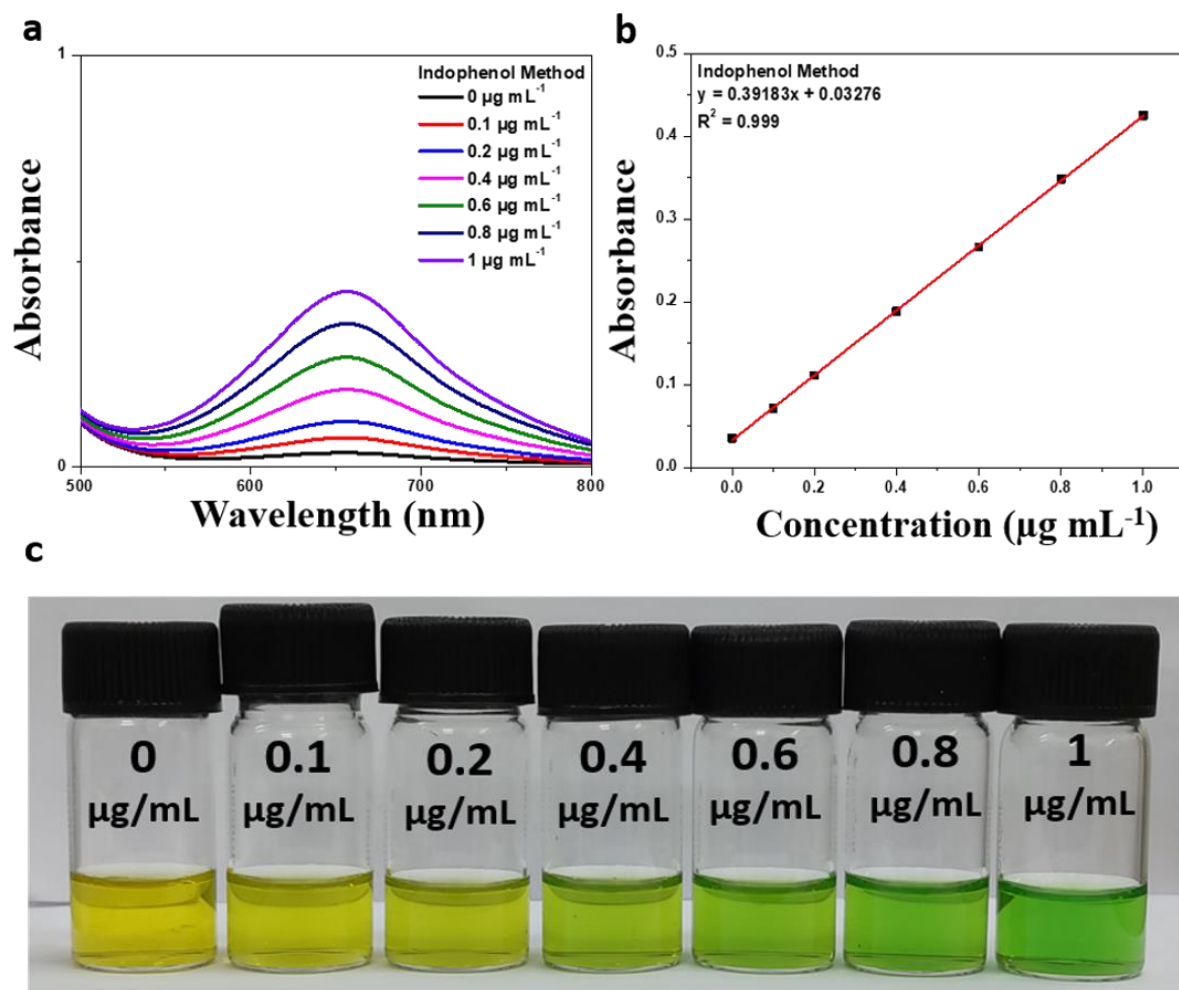

**Figure S9.** (a) UV-visible spectrum of the known standard solution of  $\text{NH}_4\text{Cl}$ , (b) Calibration plot for  $\text{NH}_3$  detection, (c) Photograph of standard solutions of  $\text{NH}_4\text{Cl}$  stained with indophenol blue indicator after incubation in the dark for 2 h.

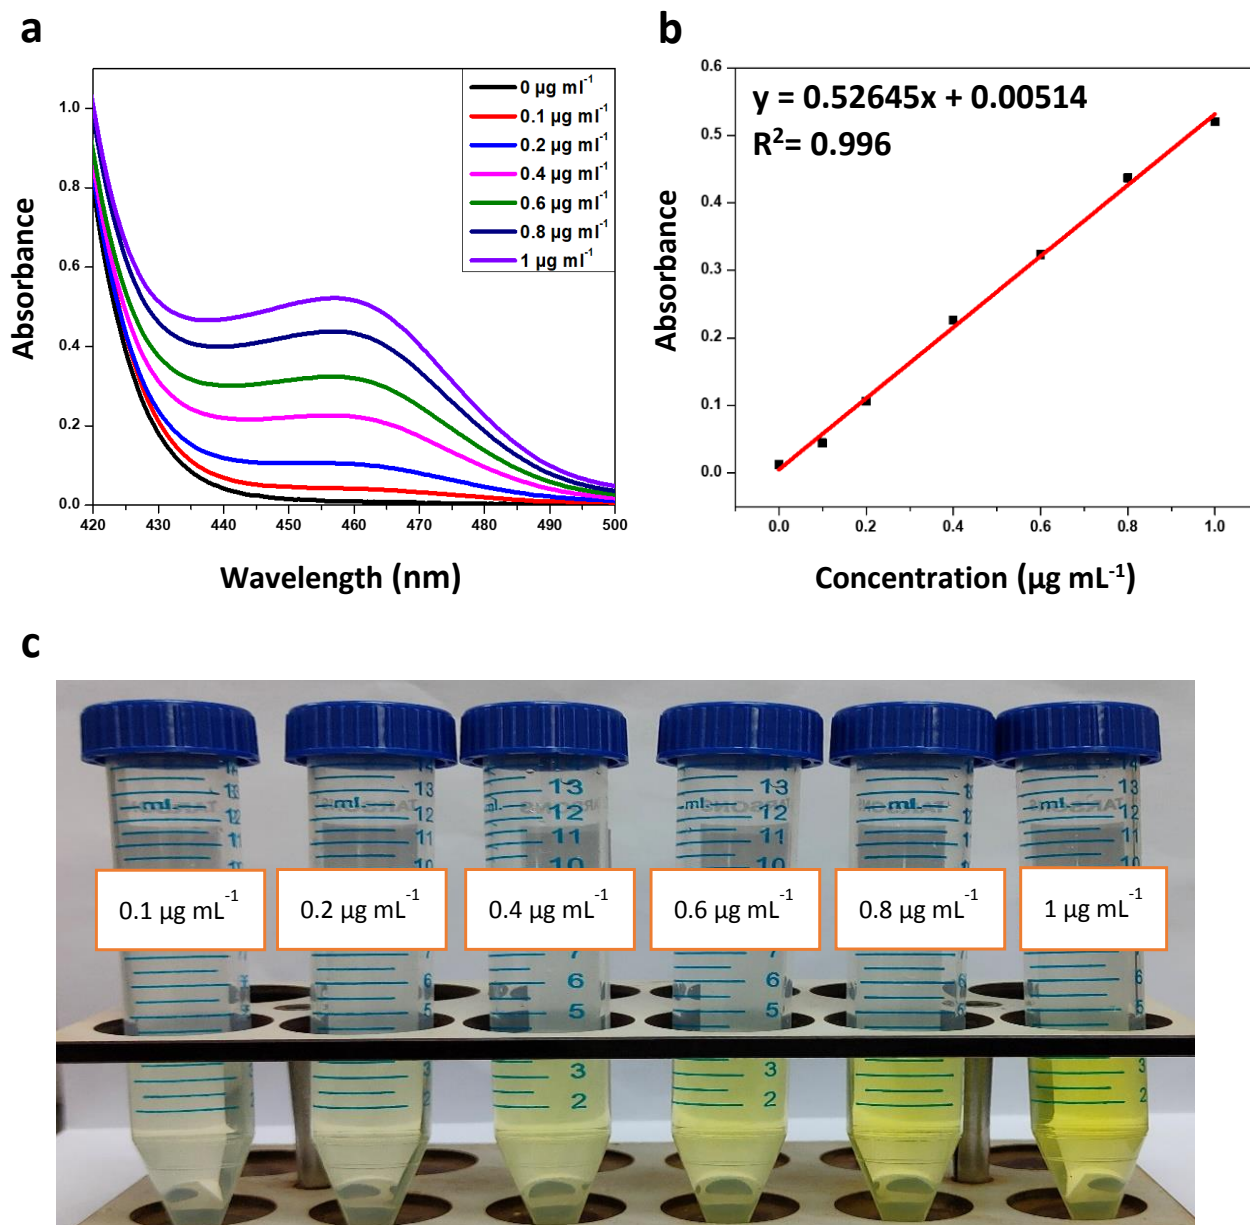

**Figure S10.** (a) UV-visible spectrum of known standard solution of Hydrazine monohydrate, (b) Calibration plot for  $\text{N}_2\text{H}_4$  detection, (c) Photograph of standard solutions of Hydrazine monohydrate stained with indicator after incubation in the dark for 30 min.



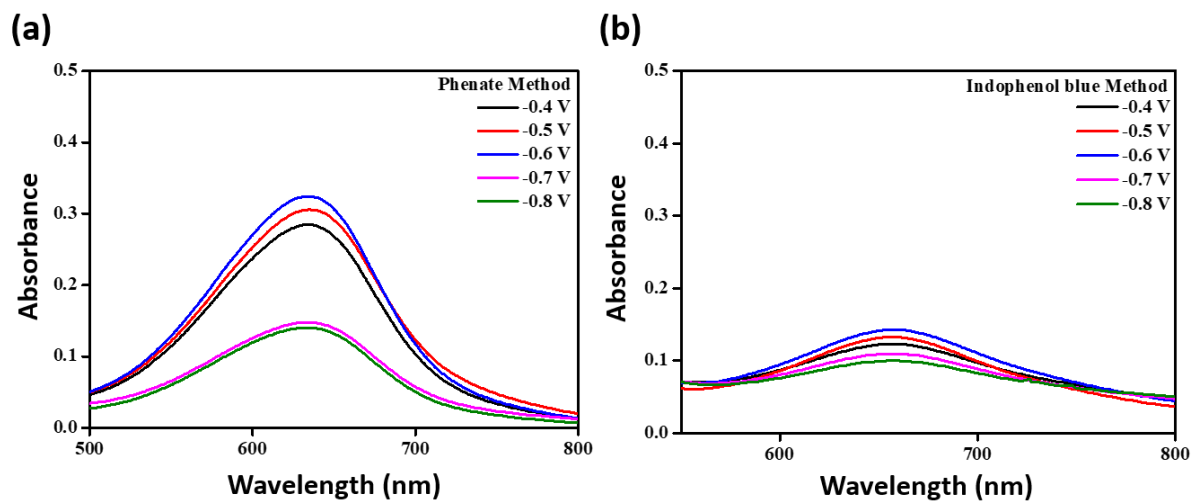

**Figure S11.** (a) UV-visible spectra of the stained electrolytes after 2 h electrolysis at different potentials by phenate method and (b) UV-Vis spectra of the stained electrolytes after 2 h electrolysis at different potentials by indophenol blue method.

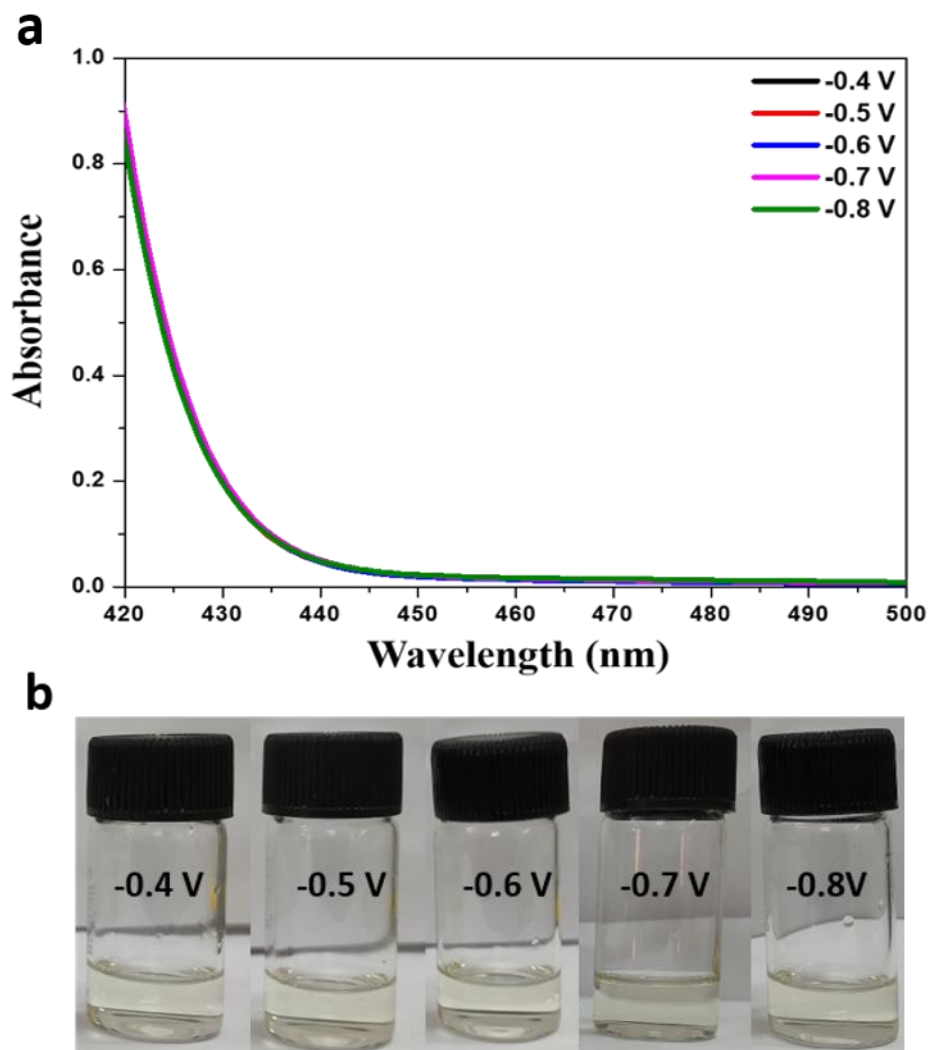

**Figure S12.** (a) UV-visible spectra of resultant electrolytes after 2 h of electrolysis at different potentials stained with the indicator for hydrazine detection, (b) Photograph of corresponding electrolytes stained with indicator after incubation in the dark for 30 min.

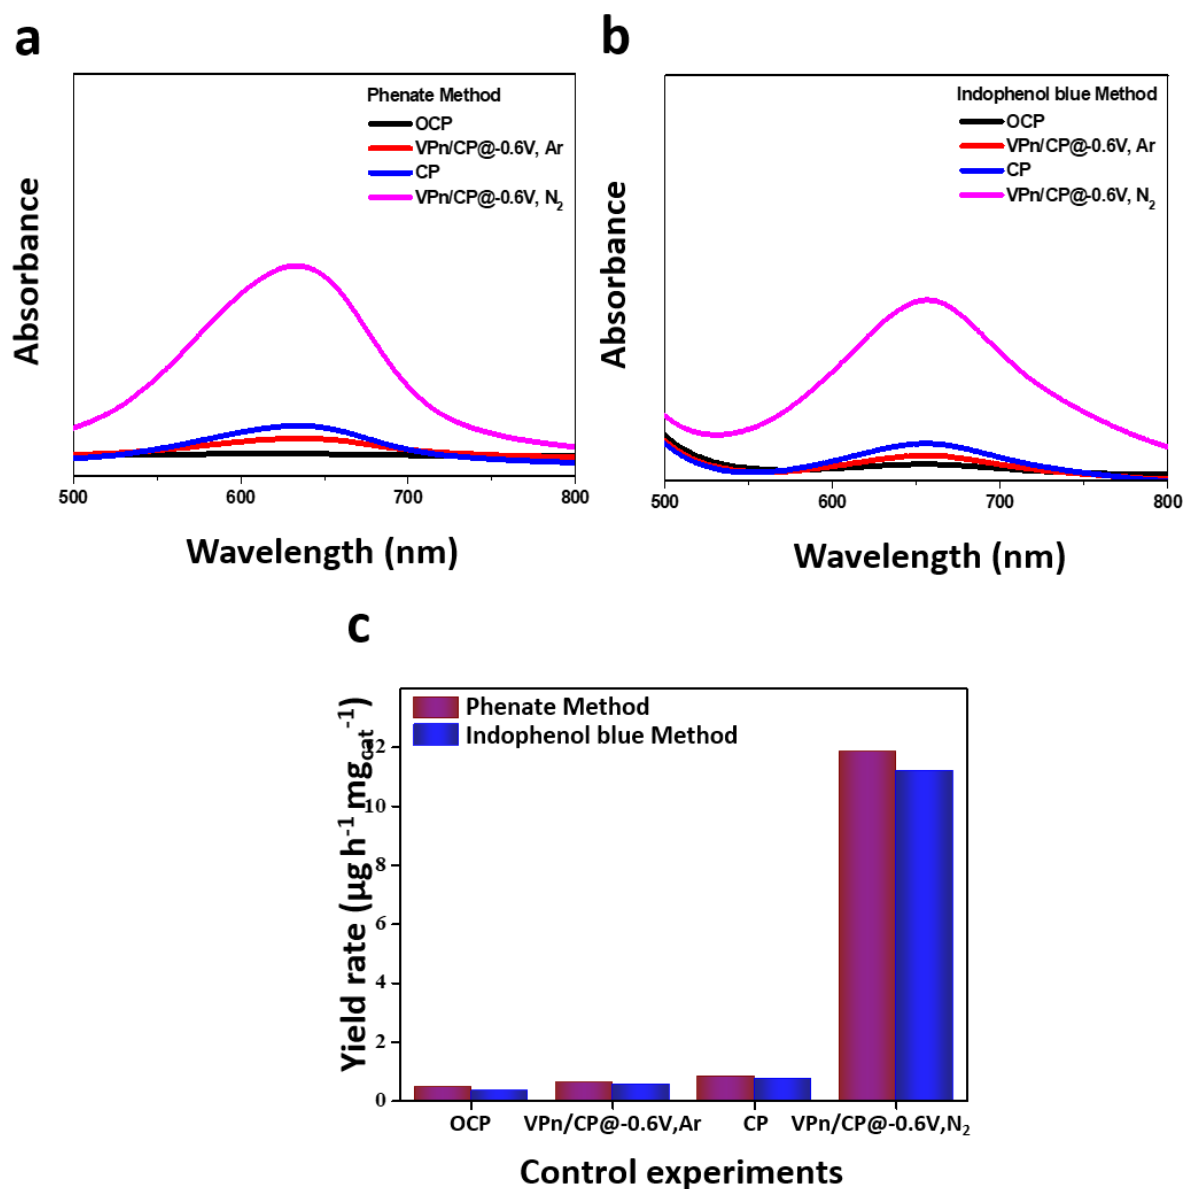

**Figure S13.** (a,b) UV-visible spectra of the electrolyte after electrolysis in different control experiments (at open circuit potential (OCP), with Ar feed gas at -0.6 V for 7200 s on the VPn loaded CP (VPn/CP@-0.6V, Ar), with N<sub>2</sub> feed gas at -0.6 V for 7200 s on the bare Carbon paper (CP), and at -0.6 V with VPn modified CP in N<sub>2</sub> saturated electrolyte (VPn/CP@-0.6V, N<sub>2</sub>), (c) Yield rate of NH<sub>3</sub> at four different control experiments.

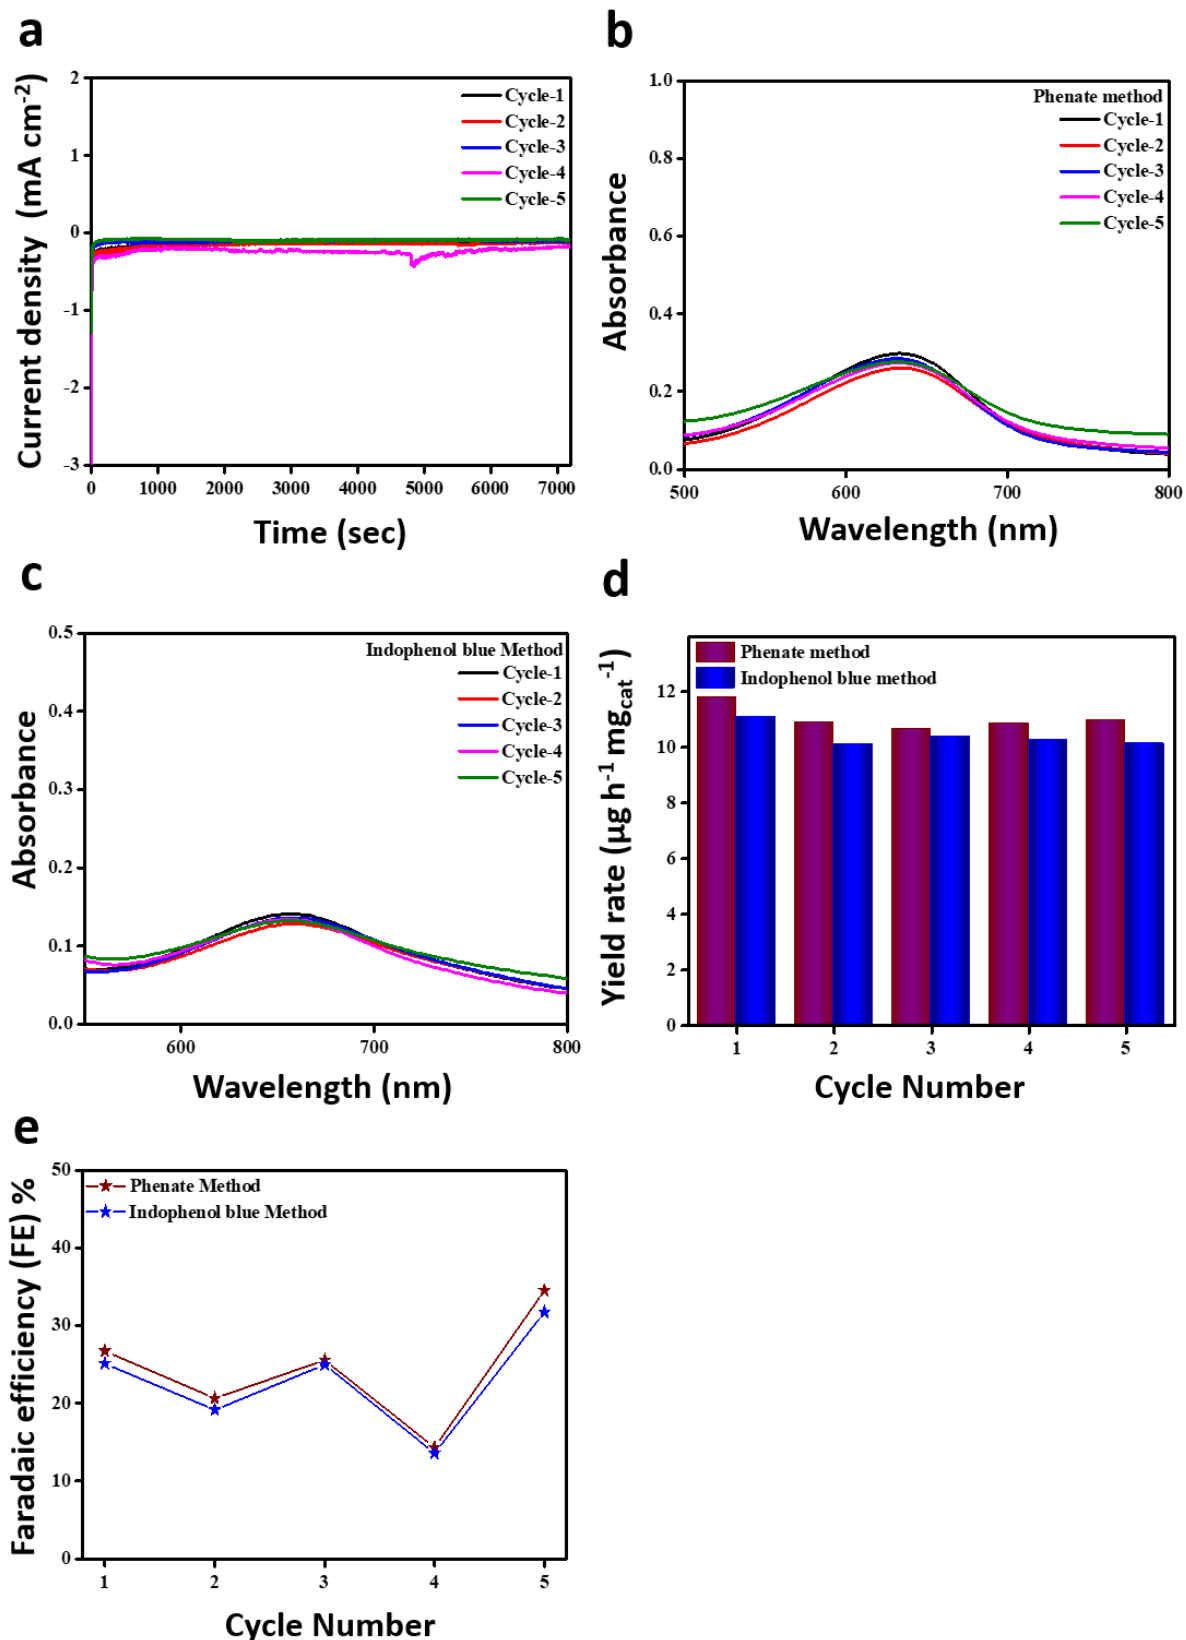

**Figure S14.** (a) chronoamperometry (i-t) curve of five consecutive cyclic tests of VPn at -0.6 V, (b,c) UV-visible spectra of the stained electrolytes after 2 h electrolysis during five consecutive cyclic tests at -0.6 V by phenate method and indophenol blue method respectively, (d) Yield rate of NH<sub>3</sub> and (e) faradaic efficiency (FE) calculated for five consecutive cyclic tests of VPn at -0.6 V.

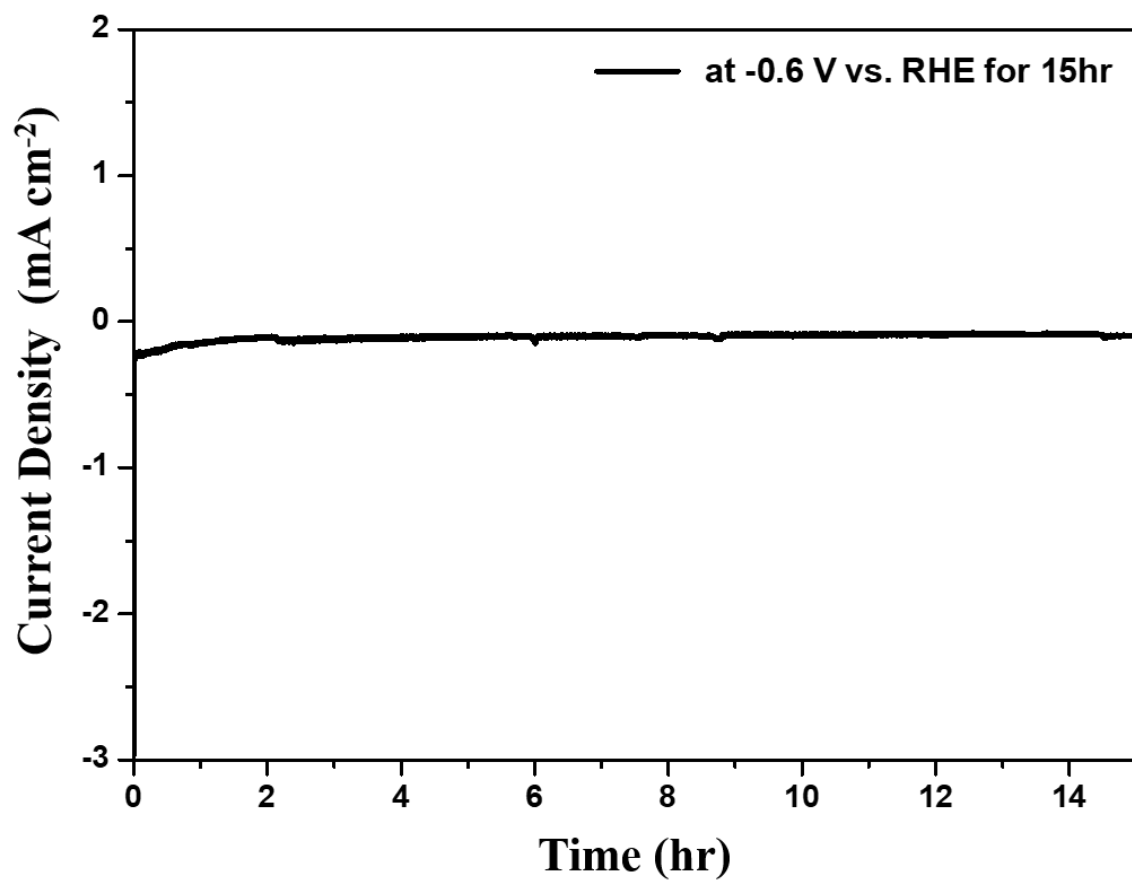

**Figure S15.** Long-term stability test of VPn over 15 h of electrochemical NRR.

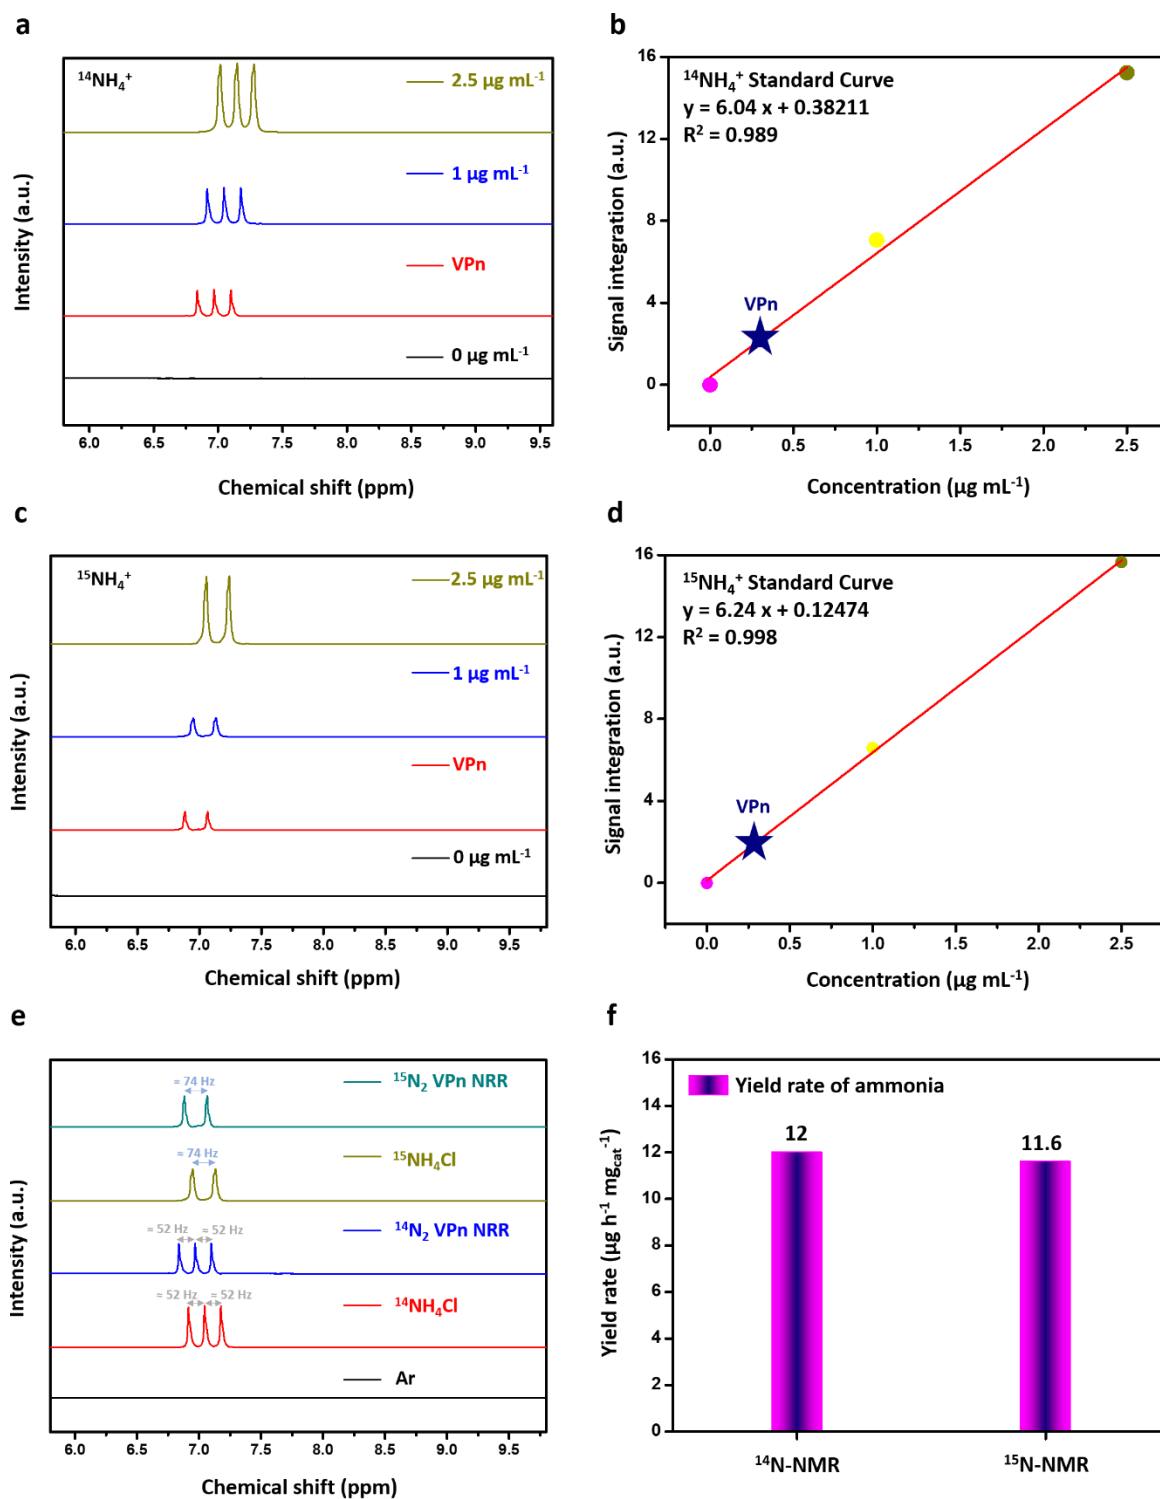

**Figure S16.** (a)  $^1\text{H-NMR}$  spectrum acquired after isotope labeling NRR experiment by VPn for  $^{14}\text{N}_2$  as feed gas compared with standard  $^{14}\text{NH}_4\text{Cl}$  solutions, (b) corresponding standard calibration curve extracted from the  $^1\text{H-NMR}$  spectrum, (c)  $^1\text{H-NMR}$  spectrum acquired after isotope labeling NRR experiment by VPn for  $^{15}\text{N}_2$  as feed gas compared with standard  $^{15}\text{NH}_4\text{Cl}$  solutions, (d) corresponding standard calibration curve extracted from  $^1\text{H-NMR}$  spectrum, (e)  $^1\text{H-NMR}$  spectrum acquired after the NRR experiment by VPn under different gas-supply ( $\text{Ar}/^{14}\text{N}_2/^{15}\text{N}_2$ ) saturated electrolyte solutions compared with standard  $^{14}\text{NH}_4\text{Cl}$  and  $^{15}\text{NH}_4\text{Cl}$  solution and (f) Bar diagram comparison of  $^{14}\text{NH}_4^+$  and  $^{15}\text{NH}_4^+$  yield rates obtained using NMR quantification method.

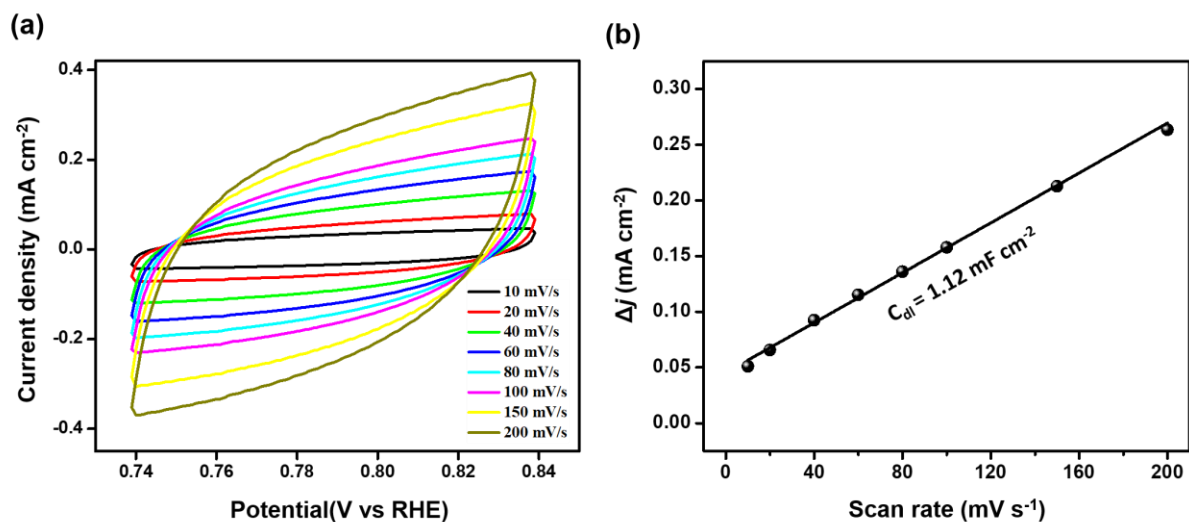

**Figure S17.** (a) CV curves in the non-Faradaic region at various scan rates (from 10 to 200 mV s<sup>-1</sup>) for VPn material in 0.1M Na<sub>2</sub>SO<sub>4</sub>, (b) the corresponding fitted plot of scan rate vs. the anodic and cathodic current difference.

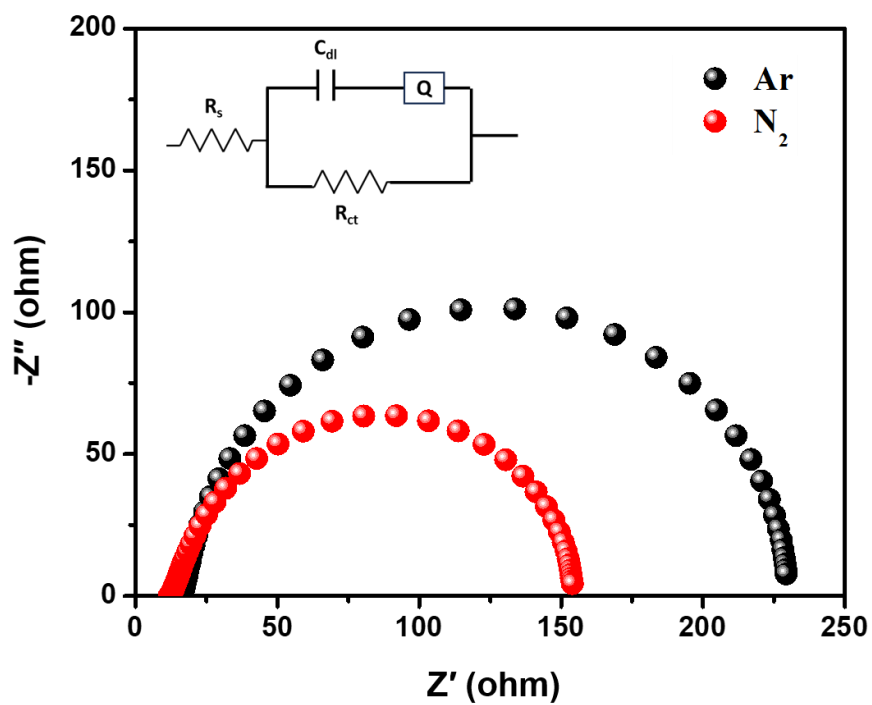

**Figure S18.** Nyquist plot for the electrochemical impedance measurements of the VPn material in  $N_2$  and Ar saturated electrolyte at  $-0.6$  V vs. RHE with a fitted equivalent circuit in the inset.



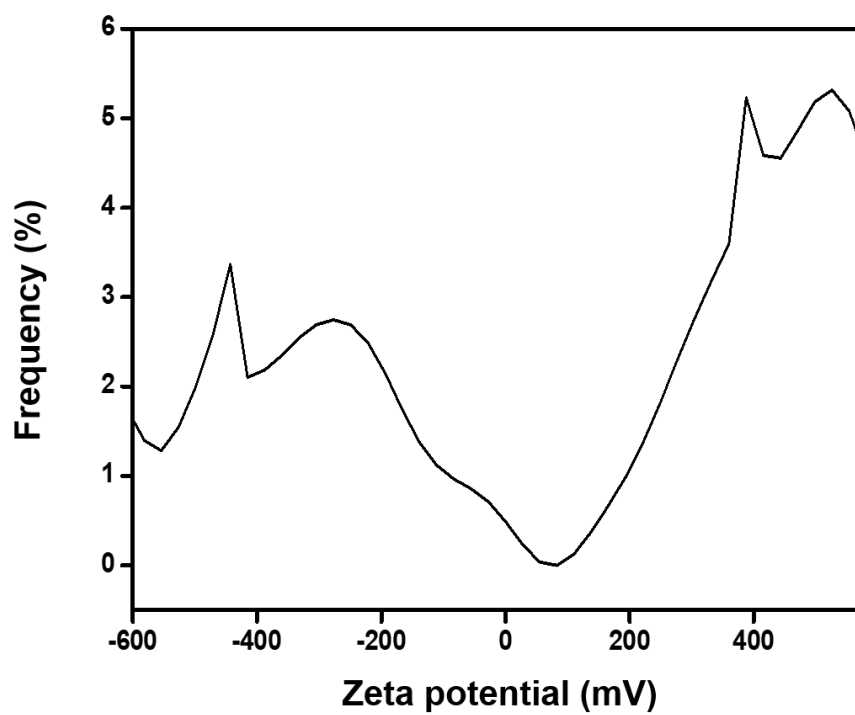

**Figure S19.** Zeta potential distribution curve for VPn material.

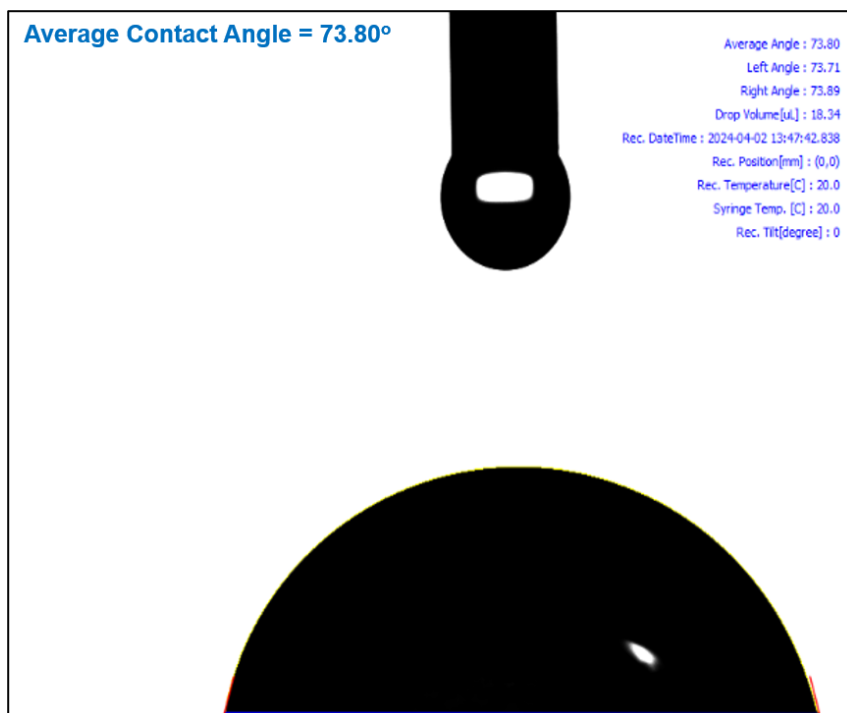

**Figure S20.** Surface contact angle measurement of VPn material.

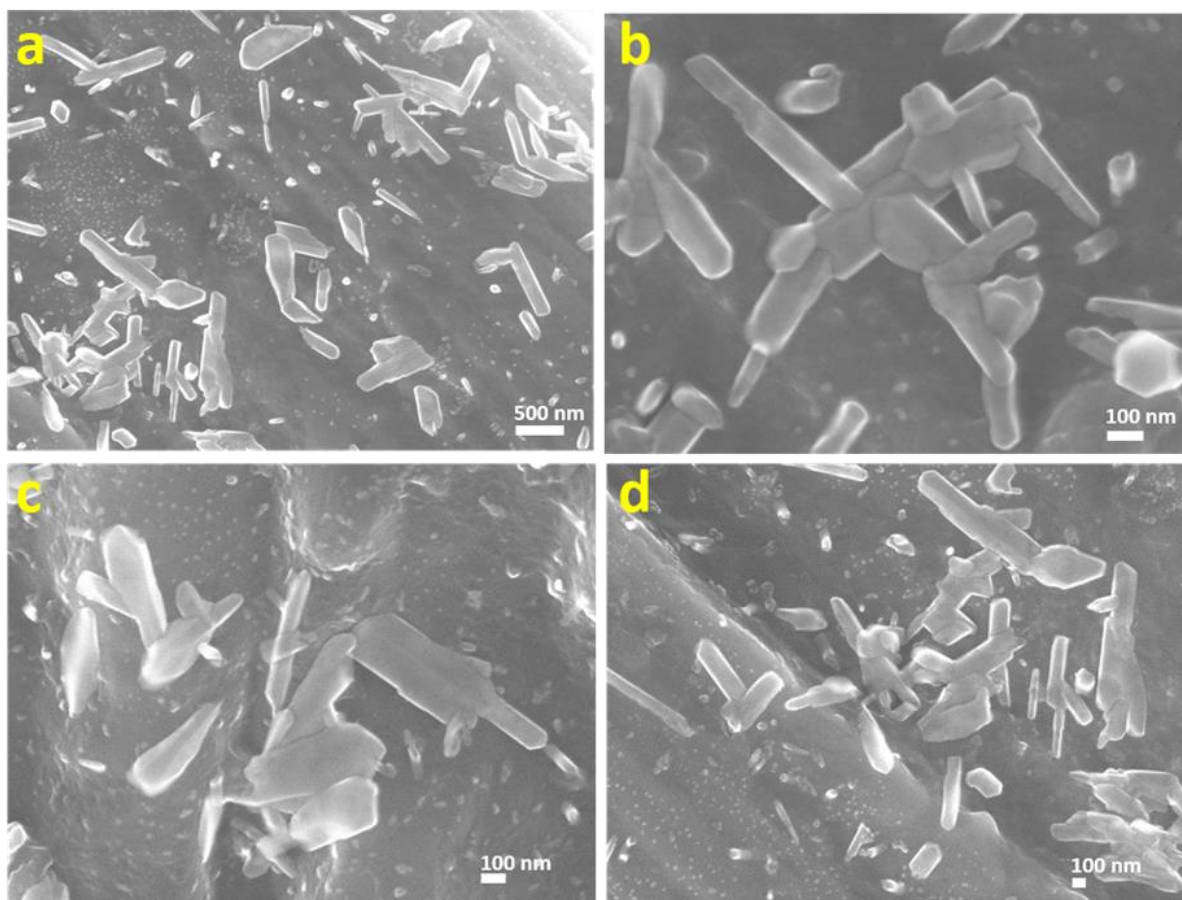

**Figure S21.** (a-d) FE-SEM images of VPn at different scales after durability test.

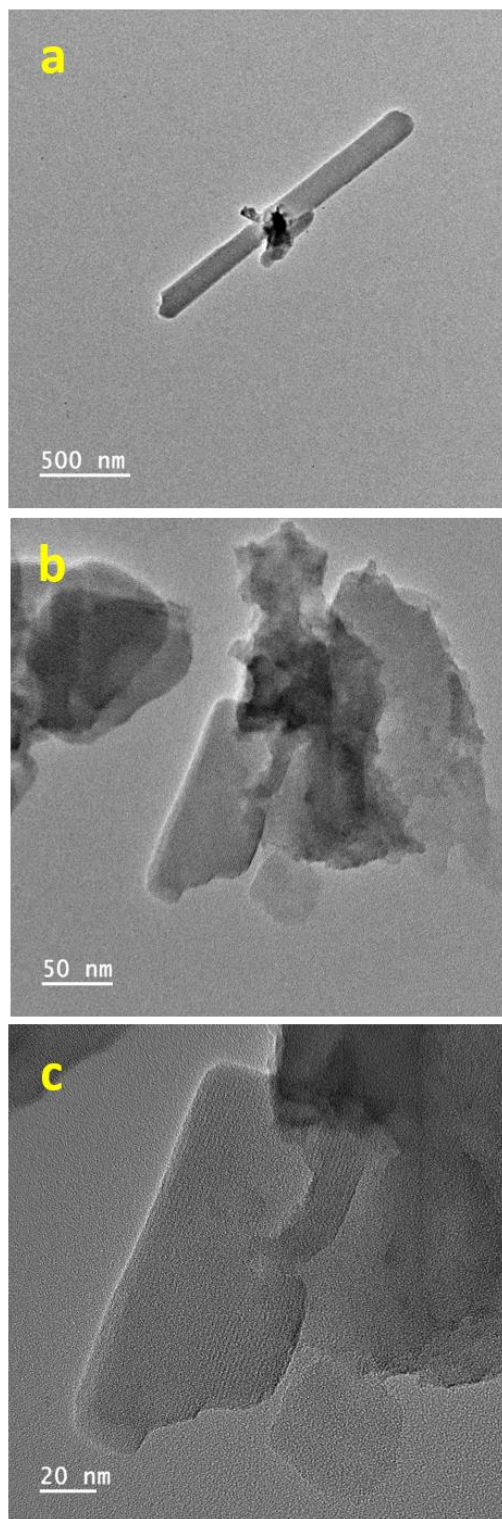

**Figure S22.** TEM images (a-c) of VPn catalyst after durability test.

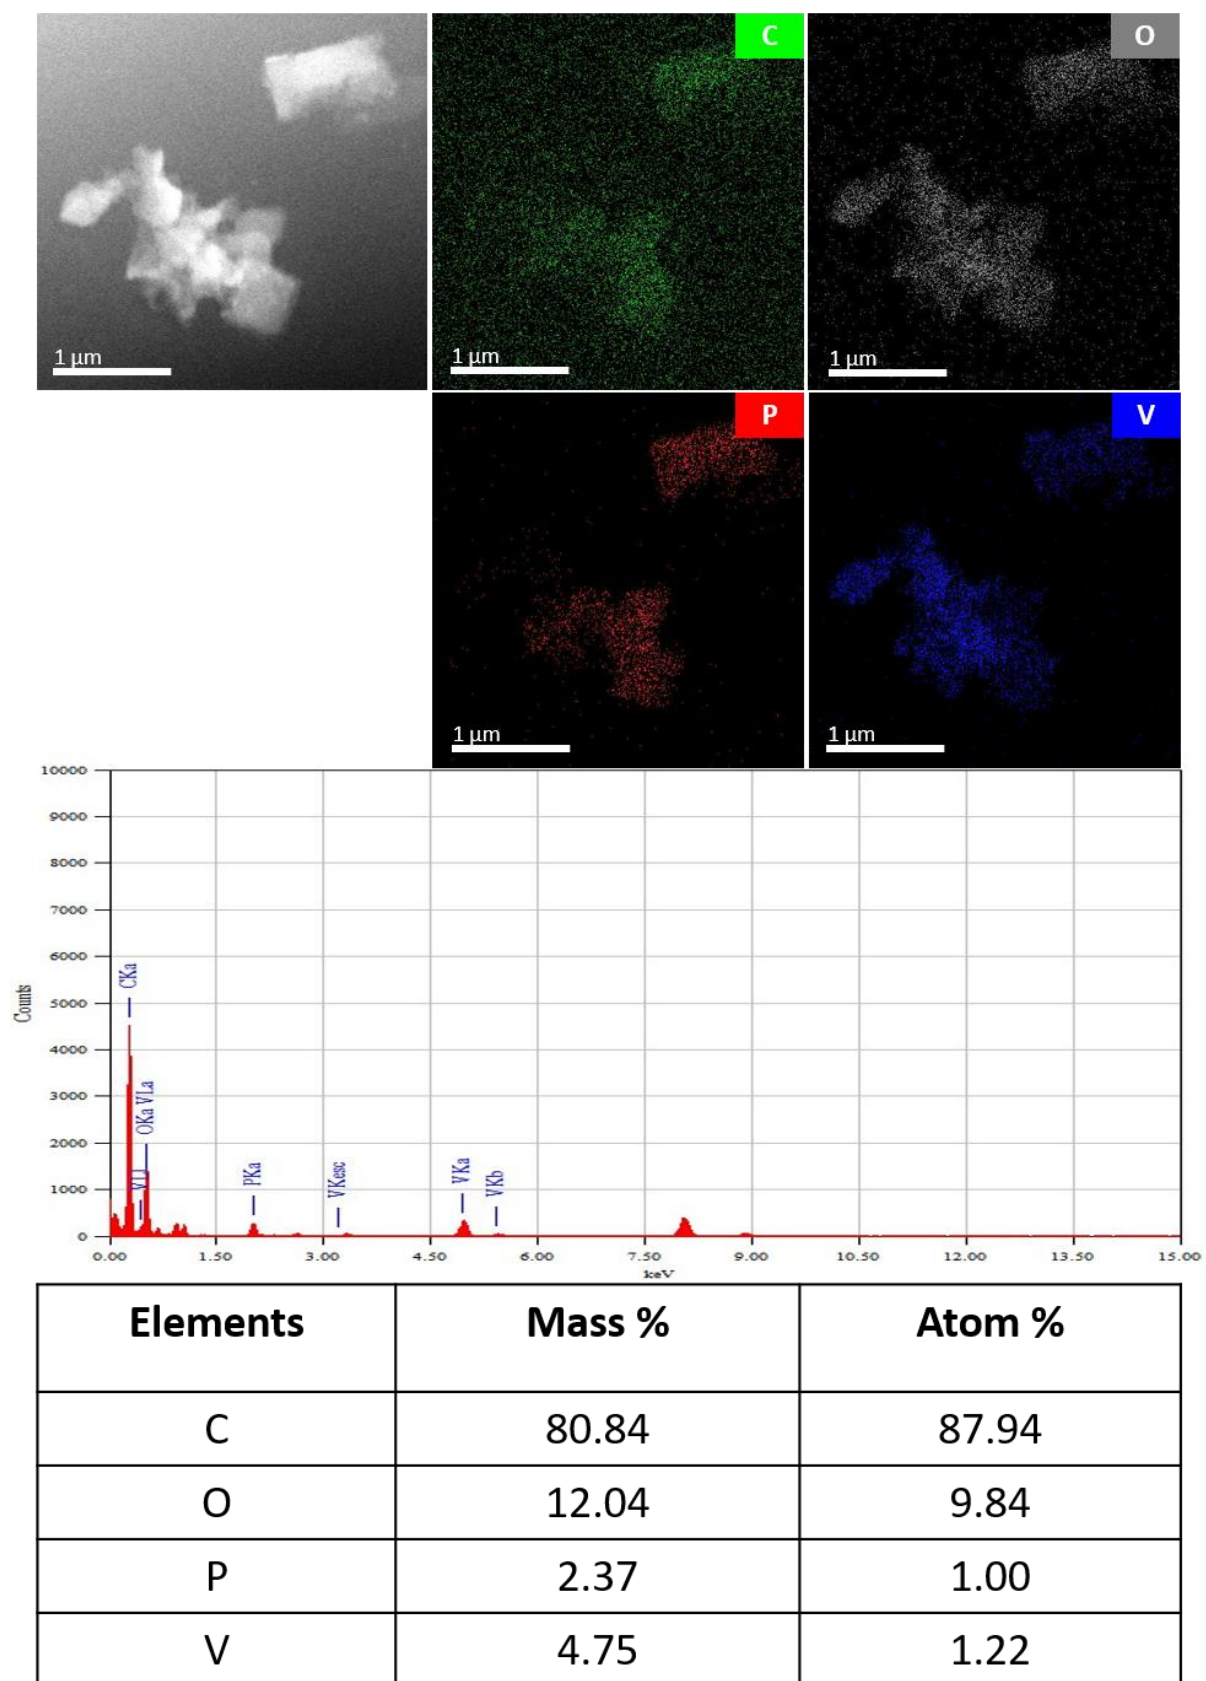

**Figure S23.** EDS and elemental mapping with corresponding TEM images of VPn catalyst after durability test.

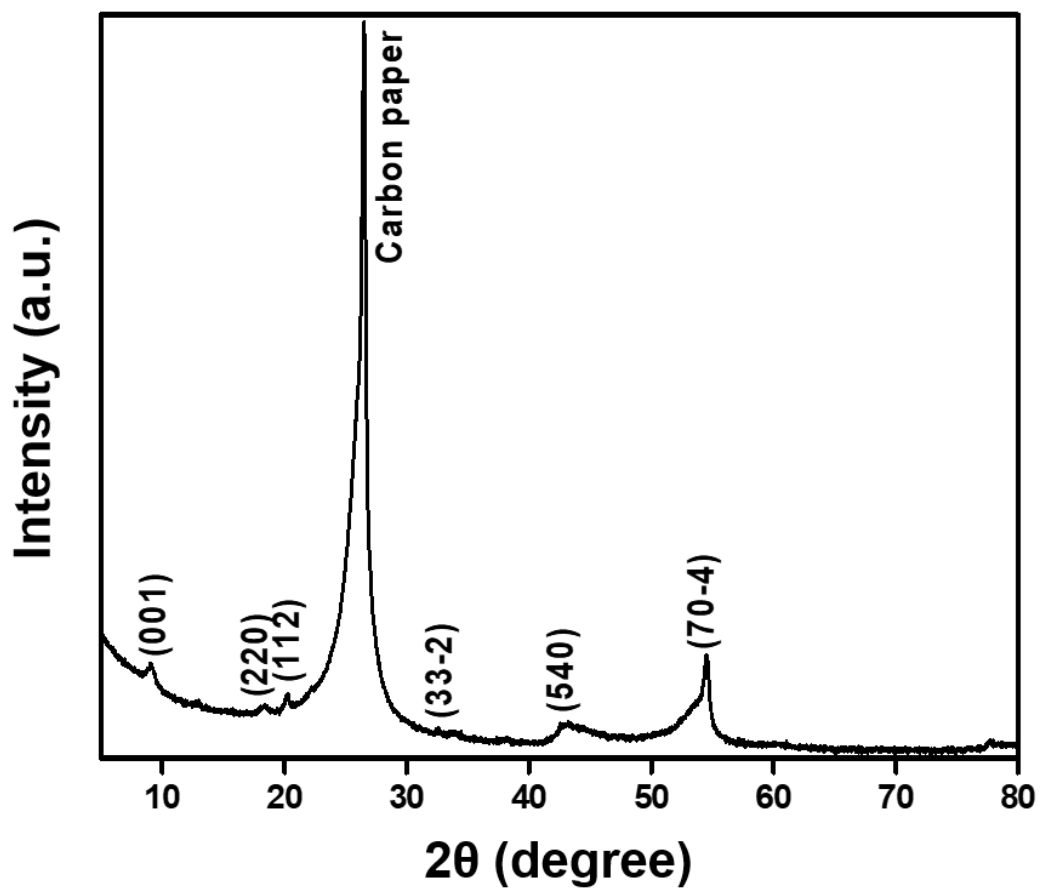

**Figure S24.** Wide angle powder XRD pattern of the as-prepared VPn material after a long cycling test.

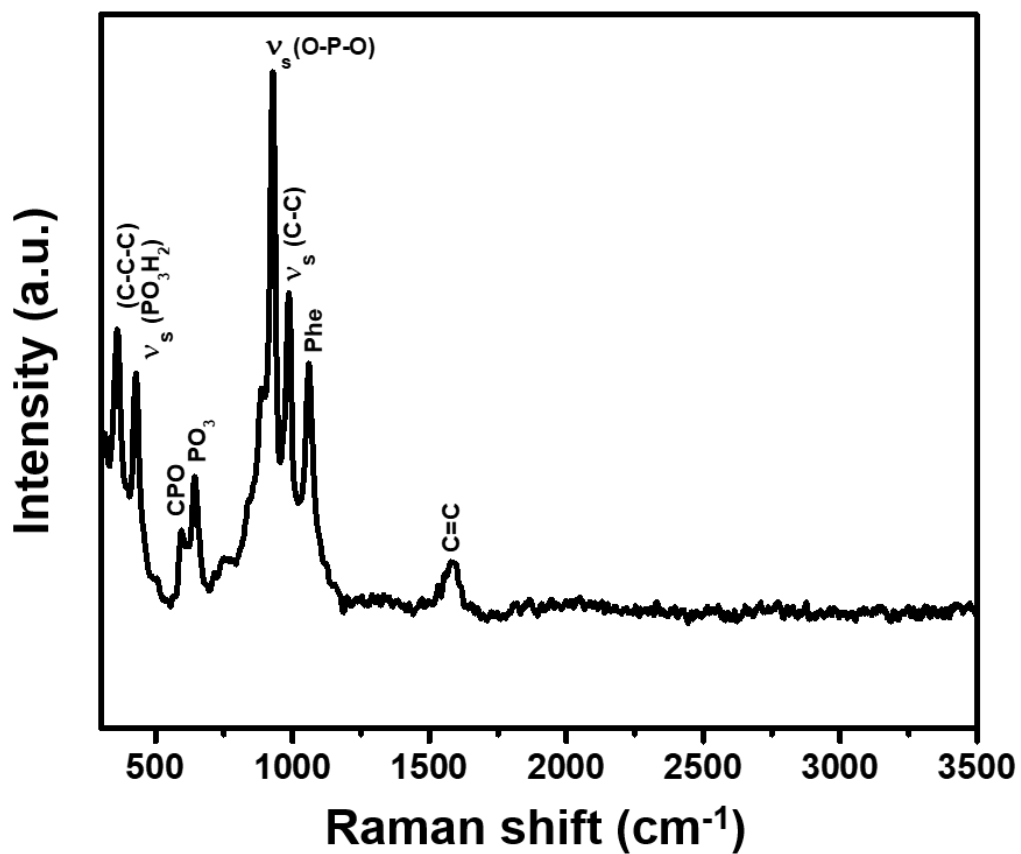

**Figure S25.** Raman spectrum of the as-prepared VPn material after a long cycling test.

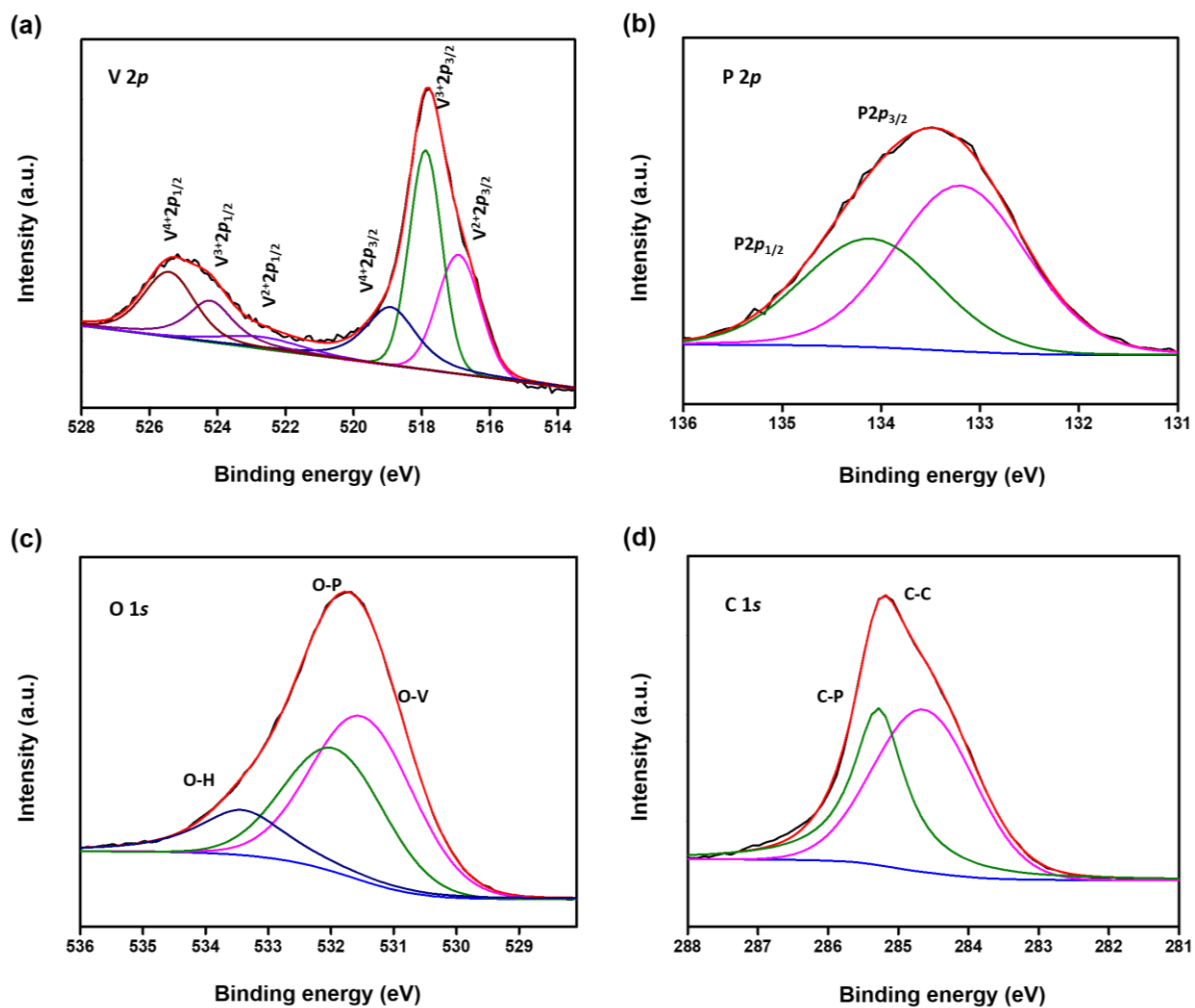

**Figure S26.** Narrow range XPS spectrum of VPn containing elements (a) V 2p, (b) P 2p, (c) O 1s, (d) C 1s, after a long cycling test.



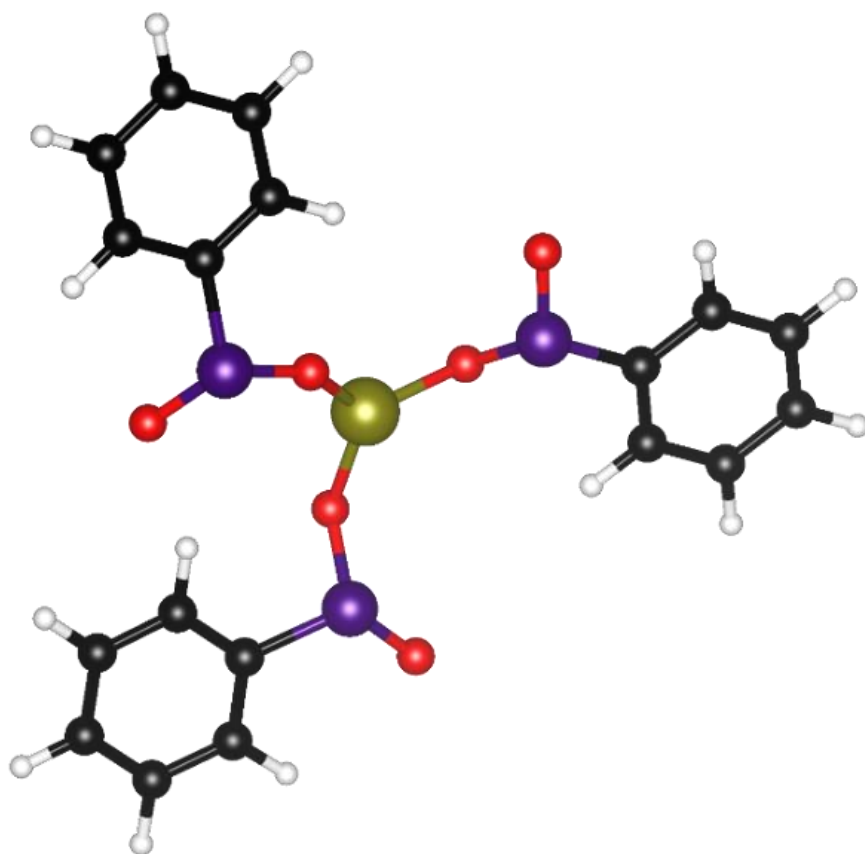

**Figure S27.** DFT optimized structure of as-synthesized VPn (Vanadium: Dark yellow, Oxygen: Red, Phosphorus: Purple, Carbon: Black, Hydrogen: White).

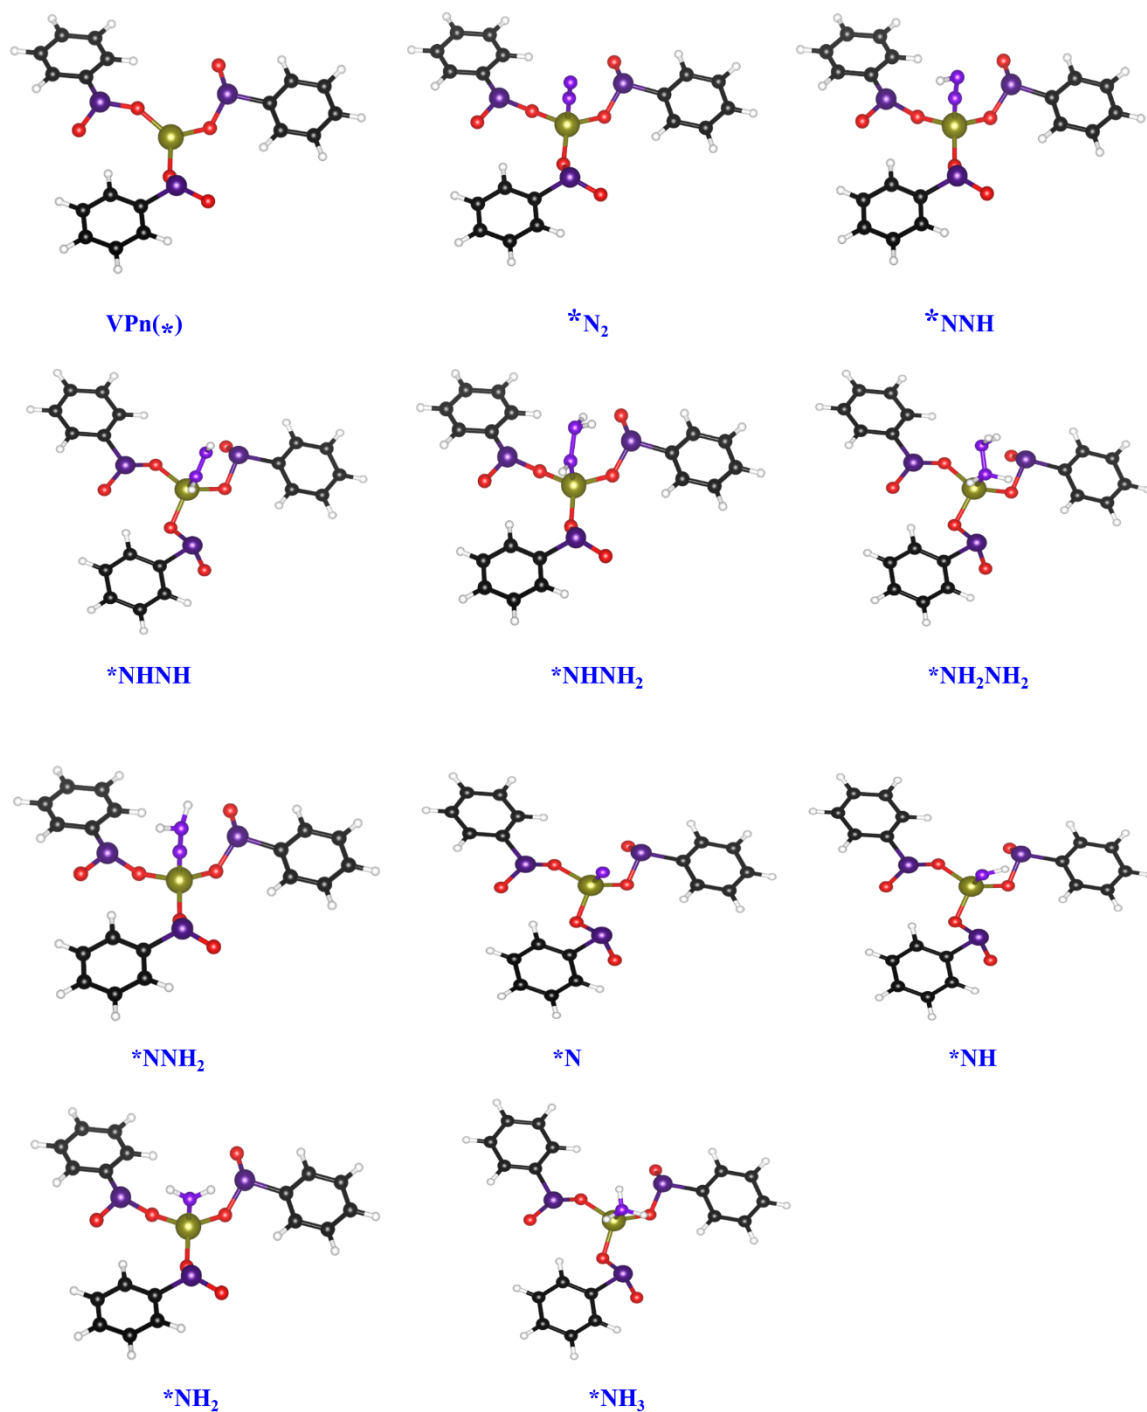

**Figure S28.** Optimized DFT structures of the as-prepared VPn material and all the intermediates involved in the NRR mechanism.

| No. | Atom | Label | x        | y        | z       |
|-----|------|-------|----------|----------|---------|
| 1   | V    | V1    | 11.10403 | 10.74840 | 8.41530 |
| 2   | O    | O1    | 12.74478 | 11.50641 | 7.98234 |
| 3   | O    | O2    | 9.71895  | 11.68154 | 9.20121 |
| 4   | O    | O3    | 11.03325 | 8.93416  | 8.12391 |
| 5   | P    | P1    | 13.48298 | 12.48467 | 9.04690 |
| 6   | P    | P2    | 11.29354 | 7.72558  | 9.18681 |
| 7   | P    | P3    | 8.15230  | 11.74912 | 9.56798 |
| 8   | O    | O4    | 13.13024 | 13.95684 | 9.04099 |
| 9   | O    | O5    | 12.60216 | 6.97131  | 9.09593 |
| 10  | O    | O6    | 7.25772  | 10.58900 | 9.18007 |
| 11  | C    | C1    | 15.24211 | 12.10751 | 8.91247 |
| 12  | C    | C2    | 16.15619 | 13.17213 | 9.00517 |
| 13  | C    | C3    | 15.68604 | 10.77503 | 8.82147 |
| 14  | C    | C4    | 17.52700 | 12.89795 | 8.97634 |
| 15  | C    | C5    | 17.05956 | 10.51581 | 8.80226 |
| 16  | C    | C6    | 17.97727 | 11.57353 | 8.87770 |
| 17  | C    | C7    | 9.78832  | 6.73092  | 9.10737 |
| 18  | C    | C8    | 8.53343  | 7.36607  | 9.05938 |
| 19  | C    | C9    | 9.89199  | 5.33001  | 9.17478 |
| 20  | C    | C10   | 7.37602  | 6.58231  | 9.05218 |
| 21  | C    | C11   | 7.47015  | 5.18407  | 9.09936 |
| 22  | C    | C12   | 8.72449  | 4.55992  | 9.15586 |
| 23  | C    | C13   | 7.58991  | 13.39193 | 9.06083 |
| 24  | C    | C14   | 6.19988  | 13.60577 | 8.97895 |
| 25  | C    | C15   | 8.49549  | 14.45358 | 8.87191 |
| 26  | C    | C16   | 5.71970  | 14.88643 | 8.69197 |
| 27  | C    | C17   | 6.61591  | 15.94489 | 8.48850 |
| 28  | C    | C18   | 7.99932  | 15.72751 | 8.57266 |
| 29  | H    | H1    | 10.88456 | 4.86598  | 9.21667 |
| 30  | H    | H2    | 8.79443  | 3.46557  | 9.17310 |
| 31  | H    | H3    | 6.55821  | 4.57464  | 9.09291 |
| 32  | H    | H4    | 6.39690  | 7.07325  | 9.00432 |
| 33  | H    | H5    | 8.45150  | 8.45872  | 9.02191 |
| 34  | H    | H6    | 5.51289  | 12.76400 | 9.12817 |
| 35  | H    | H7    | 9.57591  | 14.27767 | 8.94297 |
| 36  | H    | H8    | 8.69684  | 16.55747 | 8.40651 |
| 37  | H    | H9    | 6.23164  | 16.94713 | 8.26339 |
| 38  | H    | H10   | 4.63803  | 15.05961 | 8.62451 |
| 39  | H    | H11   | 14.95912 | 9.95538  | 8.76203 |
| 40  | H    | H12   | 17.41770 | 9.48120  | 8.73135 |
| 41  | H    | H13   | 19.05360 | 11.36392 | 8.85960 |
| 42  | H    | H14   | 18.24806 | 13.72208 | 9.02972 |
| 43  | H    | H15   | 15.77291 | 14.19666 | 9.07980 |

**Table S3.** Optimized coordinates of VPn material.

| No. | Atom | Label | x        | y        | z        |
|-----|------|-------|----------|----------|----------|
| 1   | V    | V1    | 11.22457 | 10.71422 | 8.99917  |
| 2   | O    | O1    | 12.81056 | 11.47872 | 8.48796  |
| 3   | O    | O2    | 9.73860  | 11.72821 | 8.63509  |
| 4   | O    | O3    | 11.03475 | 8.95842  | 8.54748  |
| 5   | P    | P1    | 13.63642 | 12.69025 | 9.22983  |
| 6   | P    | P2    | 11.30565 | 7.59586  | 9.43376  |
| 7   | P    | P3    | 8.35255  | 11.80417 | 9.51232  |
| 8   | O    | O4    | 13.26716 | 14.10856 | 8.84701  |
| 9   | O    | O5    | 12.59983 | 6.86013  | 9.15938  |
| 10  | O    | O6    | 7.40452  | 10.62602 | 9.38548  |
| 11  | C    | C1    | 15.37103 | 12.23227 | 9.00310  |
| 12  | C    | C2    | 16.33597 | 13.25644 | 9.02393  |
| 13  | C    | C3    | 15.75353 | 10.88168 | 8.91501  |
| 14  | C    | C4    | 17.69110 | 12.91978 | 8.94456  |
| 15  | C    | C5    | 17.11178 | 10.55951 | 8.83580  |
| 16  | C    | C6    | 18.07820 | 11.57489 | 8.86020  |
| 17  | C    | C7    | 9.78323  | 6.63841  | 9.23053  |
| 18  | C    | C8    | 8.53478  | 7.28588  | 9.17456  |
| 19  | C    | C9    | 9.87439  | 5.23335  | 9.23066  |
| 20  | C    | C10   | 7.37221  | 6.51198  | 9.10075  |
| 21  | C    | C11   | 7.45469  | 5.11209  | 9.09706  |
| 22  | C    | C12   | 8.70208  | 4.47399  | 9.15384  |
| 23  | C    | C13   | 7.67706  | 13.42880 | 9.08609  |
| 24  | C    | C14   | 6.27999  | 13.58987 | 9.04292  |
| 25  | C    | C15   | 8.53685  | 14.52677 | 8.89588  |
| 26  | C    | C16   | 5.74605  | 14.85851 | 8.79325  |
| 27  | C    | C17   | 6.59688  | 15.95721 | 8.61179  |
| 28  | C    | C18   | 7.98822  | 15.78995 | 8.65376  |
| 29  | H    | H1    | 10.86135 | 4.75750  | 9.27265  |
| 30  | H    | H2    | 8.76117  | 3.37841  | 9.13476  |
| 31  | H    | H3    | 6.53782  | 4.51250  | 9.04888  |
| 32  | H    | H4    | 6.39735  | 7.01107  | 9.04547  |
| 33  | H    | H5    | 8.46195  | 8.38024  | 9.18209  |
| 34  | H    | H6    | 5.63323  | 12.71618 | 9.18488  |
| 35  | H    | H7    | 9.62409  | 14.38735 | 8.92453  |
| 36  | H    | H8    | 8.65006  | 16.64907 | 8.49291  |
| 37  | H    | H9    | 6.17223  | 16.95217 | 8.43272  |
| 38  | H    | H10   | 4.65918  | 14.99233 | 8.73460  |
| 39  | H    | H11   | 14.98915 | 10.09645 | 8.89273  |
| 40  | H    | H12   | 17.41694 | 9.50982  | 8.75133  |
| 41  | H    | H13   | 19.14231 | 11.31610 | 8.80915  |
| 42  | H    | H14   | 18.45067 | 13.71060 | 8.94465  |
| 43  | H    | H15   | 16.00961 | 14.30139 | 9.08316  |
| 44  | N    | N1    | 11.32209 | 10.69800 | 10.91039 |
| 45  | N    | N2    | 11.38838 | 10.68794 | 12.04942 |

**Table S4.** Optimized coordinates of \*N<sub>2</sub>.

| No. | Atom | Label | x        | y        | z        |
|-----|------|-------|----------|----------|----------|
| 1   | V    | V1    | 11.24167 | 10.70743 | 9.03365  |
| 2   | O    | O1    | 12.74903 | 11.60300 | 8.47129  |
| 3   | O    | O2    | 9.67388  | 11.54255 | 8.59271  |
| 4   | O    | O3    | 11.26139 | 8.94143  | 8.59382  |
| 5   | P    | P1    | 13.62762 | 12.72602 | 9.25153  |
| 6   | P    | P2    | 11.37893 | 7.61903  | 9.56052  |
| 7   | P    | P3    | 8.34724  | 11.67855 | 9.54924  |
| 8   | O    | O4    | 13.29302 | 14.17979 | 9.00805  |
| 9   | O    | O5    | 12.64276 | 6.79787  | 9.43177  |
| 10  | O    | O6    | 7.34613  | 10.53985 | 9.49886  |
| 11  | C    | C1    | 15.34919 | 12.24781 | 9.00681  |
| 12  | C    | C2    | 16.31726 | 13.26968 | 9.00787  |
| 13  | C    | C3    | 15.72572 | 10.89224 | 8.94934  |
| 14  | C    | C4    | 17.66979 | 12.92710 | 8.93036  |
| 15  | C    | C5    | 17.08276 | 10.56520 | 8.87581  |
| 16  | C    | C6    | 18.05084 | 11.57961 | 8.86705  |
| 17  | C    | C7    | 9.83012  | 6.72248  | 9.29889  |
| 18  | C    | C8    | 8.60128  | 7.40682  | 9.25049  |
| 19  | C    | C9    | 9.88177  | 5.31645  | 9.26301  |
| 20  | C    | C10   | 7.41742  | 6.66998  | 9.14414  |
| 21  | C    | C11   | 7.46242  | 5.26992  | 9.08277  |
| 22  | C    | C12   | 8.69027  | 4.59500  | 9.14079  |
| 23  | C    | C13   | 7.69820  | 13.31323 | 9.13623  |
| 24  | C    | C14   | 6.30490  | 13.49508 | 9.08487  |
| 25  | C    | C15   | 8.57869  | 14.39847 | 8.97380  |
| 26  | C    | C16   | 5.79475  | 14.77367 | 8.83479  |
| 27  | C    | C17   | 6.66714  | 15.85644 | 8.65991  |
| 28  | C    | C18   | 8.05540  | 15.67213 | 8.73260  |
| 29  | H    | H1    | 10.85585 | 4.81506  | 9.31261  |
| 30  | H    | H2    | 8.71804  | 3.49910  | 9.09303  |
| 31  | H    | H3    | 6.53025  | 4.69888  | 8.99451  |
| 32  | H    | H4    | 6.45564  | 7.19710  | 9.11458  |
| 33  | H    | H5    | 8.55166  | 8.50086  | 9.29300  |
| 34  | H    | H6    | 5.64665  | 12.62954 | 9.22318  |
| 35  | H    | H7    | 9.66281  | 14.24398 | 9.02871  |
| 36  | H    | H8    | 8.73228  | 16.52515 | 8.59956  |
| 37  | H    | H9    | 6.25982  | 16.85698 | 8.47122  |
| 38  | H    | H10   | 4.71063  | 14.92965 | 8.77442  |
| 39  | H    | H11   | 14.96149 | 10.10648 | 8.95642  |
| 40  | H    | H12   | 17.39031 | 9.51334  | 8.82828  |
| 41  | H    | H13   | 19.11390 | 11.31597 | 8.81680  |
| 42  | H    | H14   | 18.43434 | 13.71371 | 8.92204  |
| 43  | H    | H15   | 15.98858 | 14.31479 | 9.05602  |
| 44  | N    | N1    | 11.26667 | 10.73429 | 10.75327 |
| 45  | N    | N2    | 11.37318 | 10.80958 | 11.99450 |
| 46  | H    | H16   | 10.65143 | 10.21198 | 12.47369 |

**Table S5.** Optimized coordinates of \*NNH.

| No. | Atom | Label | x        | y        | z        |
|-----|------|-------|----------|----------|----------|
| 1   | V    | V1    | 11.20108 | 10.63275 | 9.27494  |
| 2   | O    | O1    | 13.04120 | 10.95353 | 8.65423  |
| 3   | O    | O2    | 10.04188 | 12.11694 | 8.71197  |
| 4   | O    | O3    | 10.54739 | 8.97729  | 8.43555  |
| 5   | P    | P1    | 13.56776 | 12.38082 | 9.49148  |
| 6   | P    | P2    | 11.21275 | 7.68920  | 9.39124  |
| 7   | P    | P3    | 8.51039  | 11.76769 | 9.45464  |
| 8   | O    | O4    | 13.39102 | 13.38744 | 8.08802  |
| 9   | O    | O5    | 11.99758 | 6.97351  | 8.01757  |
| 10  | O    | O6    | 7.85039  | 11.05170 | 8.01729  |
| 11  | C    | C1    | 15.37580 | 12.09078 | 9.24441  |
| 12  | C    | C2    | 16.24596 | 13.18920 | 9.17998  |
| 13  | C    | C3    | 15.89862 | 10.79084 | 9.13267  |
| 14  | C    | C4    | 17.61844 | 12.99256 | 8.99638  |
| 15  | C    | C5    | 17.27167 | 10.59796 | 8.94924  |
| 16  | C    | C6    | 18.13087 | 11.69773 | 8.87969  |
| 17  | C    | C7    | 9.70894  | 6.62338  | 9.29979  |
| 18  | C    | C8    | 8.42427  | 7.18999  | 9.33655  |
| 19  | C    | C9    | 9.84529  | 5.23034  | 9.20583  |
| 20  | C    | C10   | 7.29244  | 6.37158  | 9.26869  |
| 21  | C    | C11   | 7.43561  | 4.98496  | 9.16833  |
| 22  | C    | C12   | 8.71129  | 4.41465  | 9.13858  |
| 23  | C    | C13   | 7.74577  | 13.42267 | 9.15972  |
| 24  | C    | C14   | 6.34827  | 13.52485 | 9.09707  |
| 25  | C    | C15   | 8.52854  | 14.58060 | 9.01196  |
| 26  | C    | C16   | 5.73998  | 14.76497 | 8.88005  |
| 27  | C    | C17   | 6.52376  | 15.91174 | 8.72821  |
| 28  | C    | C18   | 7.91658  | 15.81956 | 8.79545  |
| 29  | H    | H1    | 10.82797 | 4.77665  | 9.18346  |
| 30  | H    | H2    | 8.82154  | 3.34057  | 9.06368  |
| 31  | H    | H3    | 6.55871  | 4.35278  | 9.11583  |
| 32  | H    | H4    | 6.30431  | 6.81254  | 9.29468  |
| 33  | H    | H5    | 8.29506  | 8.26143  | 9.41798  |
| 34  | H    | H6    | 5.73063  | 12.64335 | 9.21472  |
| 35  | H    | H7    | 9.60778  | 14.53446 | 9.06572  |
| 36  | H    | H8    | 8.52261  | 16.70908 | 8.68118  |
| 37  | H    | H9    | 6.05204  | 16.87133 | 8.56073  |
| 38  | H    | H10   | 4.66118  | 14.83671 | 8.83041  |
| 39  | H    | H11   | 15.25264 | 9.92495  | 9.18852  |
| 40  | H    | H12   | 17.66976 | 9.59517  | 8.86199  |
| 41  | H    | H13   | 19.19316 | 11.54645 | 8.73761  |
| 42  | H    | H14   | 18.28474 | 13.84393 | 8.94488  |
| 43  | H    | H15   | 15.86102 | 14.19707 | 9.27010  |
| 44  | N    | N1    | 11.13785 | 10.47915 | 11.30976 |
| 45  | N    | N2    | 11.49552 | 11.43927 | 12.01651 |
| 46  | H    | H16   | 11.46164 | 11.37560 | 13.04472 |
| 47  | H    | H17   | 10.79879 | 9.60953  | 11.74600 |

**Table S6.** Optimized coordinates of \*NHNH.

| No. | Atom | Label | x        | y        | z        |
|-----|------|-------|----------|----------|----------|
| 1   | V    | V1    | 11.18839 | 10.64306 | 8.97150  |
| 2   | O    | O1    | 12.83673 | 11.39736 | 8.66204  |
| 3   | O    | O2    | 9.73486  | 11.69012 | 8.60056  |
| 4   | O    | O3    | 11.06754 | 8.88839  | 8.44485  |
| 5   | P    | P1    | 13.64797 | 12.49541 | 9.56041  |
| 6   | P    | P2    | 11.28955 | 7.55438  | 9.37455  |
| 7   | P    | P3    | 8.36131  | 11.75035 | 9.49308  |
| 8   | O    | O4    | 13.21675 | 13.94497 | 9.42595  |
| 9   | O    | O5    | 12.55861 | 6.75894  | 9.14834  |
| 10  | O    | O6    | 7.38719  | 10.59515 | 9.35594  |
| 11  | C    | C1    | 15.38440 | 12.14888 | 9.20008  |
| 12  | C    | C2    | 16.29180 | 13.22024 | 9.10677  |
| 13  | C    | C3    | 15.83452 | 10.81675 | 9.13941  |
| 14  | C    | C4    | 17.65259 | 12.95089 | 8.92442  |
| 15  | C    | C5    | 17.19761 | 10.56099 | 8.96850  |
| 16  | C    | C6    | 18.10469 | 11.62556 | 8.85926  |
| 17  | C    | C7    | 9.74617  | 6.62998  | 9.20132  |
| 18  | C    | C8    | 8.50596  | 7.29562  | 9.19831  |
| 19  | C    | C9    | 9.81744  | 5.22484  | 9.18836  |
| 20  | C    | C10   | 7.33123  | 6.53771  | 9.16704  |
| 21  | C    | C11   | 7.39480  | 5.13697  | 9.14818  |
| 22  | C    | C12   | 8.63393  | 4.48139  | 9.15197  |
| 23  | C    | C13   | 7.68177  | 13.38203 | 9.11722  |
| 24  | C    | C14   | 6.28359  | 13.52590 | 9.07914  |
| 25  | C    | C15   | 8.52750  | 14.49686 | 8.97415  |
| 26  | C    | C16   | 5.73240  | 14.79345 | 8.86839  |
| 27  | C    | C17   | 6.56884  | 15.90739 | 8.71846  |
| 28  | C    | C18   | 7.96232  | 15.75947 | 8.77168  |
| 29  | H    | H1    | 10.80120 | 4.74119  | 9.18767  |
| 30  | H    | H2    | 8.67649  | 3.38596  | 9.12068  |
| 31  | H    | H3    | 6.46977  | 4.54903  | 9.12716  |
| 32  | H    | H4    | 6.35981  | 7.04606  | 9.15439  |
| 33  | H    | H5    | 8.44407  | 8.39118  | 9.21225  |
| 34  | H    | H6    | 5.65323  | 12.63757 | 9.20053  |
| 35  | H    | H7    | 9.61633  | 14.37097 | 9.01319  |
| 36  | H    | H8    | 8.61122  | 16.63537 | 8.65480  |
| 37  | H    | H9    | 6.12986  | 16.89957 | 8.55717  |
| 38  | H    | H10   | 4.64375  | 14.91405 | 8.81863  |
| 39  | H    | H11   | 15.12030 | 9.98853  | 9.22358  |
| 40  | H    | H12   | 17.55955 | 9.52663  | 8.92188  |
| 41  | H    | H13   | 19.17393 | 11.41861 | 8.73132  |
| 42  | H    | H14   | 18.36952 | 13.77732 | 8.83368  |
| 43  | H    | H15   | 15.91710 | 14.24915 | 9.16683  |
| 44  | N    | N1    | 11.07304 | 10.46856 | 10.78602 |
| 45  | N    | N2    | 11.27103 | 11.41855 | 11.81472 |
| 46  | H    | H16   | 11.99565 | 11.07336 | 12.47030 |
| 47  | H    | H17   | 10.74277 | 9.57780  | 11.20230 |
| 48  | H    | H18   | 11.61592 | 12.29999 | 11.39446 |

**Table S7.** Optimized coordinates of \*NHNH<sub>2</sub>.

| No. | Atom | Label | x        | y        | z        |
|-----|------|-------|----------|----------|----------|
| 1   | V    | V1    | 11.22378 | 10.62875 | 9.40900  |
| 2   | O    | O1    | 13.07441 | 10.87231 | 8.78373  |
| 3   | O    | O2    | 10.11218 | 12.16407 | 8.88650  |
| 4   | O    | O3    | 10.50543 | 9.01948  | 8.53696  |
| 5   | P    | P1    | 13.60738 | 12.36893 | 9.48301  |
| 6   | P    | P2    | 11.19687 | 7.68815  | 9.41118  |
| 7   | P    | P3    | 8.53386  | 11.77387 | 9.49973  |
| 8   | O    | O4    | 13.40698 | 13.26129 | 8.00735  |
| 9   | O    | O5    | 11.94581 | 7.03430  | 7.98766  |
| 10  | O    | O6    | 7.98424  | 11.08460 | 8.00443  |
| 11  | C    | C1    | 15.41674 | 12.07763 | 9.23637  |
| 12  | C    | C2    | 16.28188 | 13.18002 | 9.17078  |
| 13  | C    | C3    | 15.94678 | 10.77985 | 9.12390  |
| 14  | C    | C4    | 17.65543 | 12.99028 | 8.98770  |
| 15  | C    | C5    | 17.32095 | 10.59441 | 8.94097  |
| 16  | C    | C6    | 18.17447 | 11.69827 | 8.87186  |
| 17  | C    | C7    | 9.69468  | 6.62095  | 9.31102  |
| 18  | C    | C8    | 8.40765  | 7.18297  | 9.34339  |
| 19  | C    | C9    | 9.83638  | 5.22877  | 9.21328  |
| 20  | C    | C10   | 7.27936  | 6.36098  | 9.26772  |
| 21  | C    | C11   | 7.42776  | 4.97534  | 9.16378  |
| 22  | C    | C12   | 8.70546  | 4.40941  | 9.13829  |
| 23  | C    | C13   | 7.75794  | 13.42173 | 9.19266  |
| 24  | C    | C14   | 6.35994  | 13.50672 | 9.11785  |
| 25  | C    | C15   | 8.52792  | 14.58870 | 9.04464  |
| 26  | C    | C16   | 5.73844  | 14.73812 | 8.88964  |
| 27  | C    | C17   | 6.50926  | 15.89335 | 8.73773  |
| 28  | C    | C18   | 7.90232  | 15.81863 | 8.81653  |
| 29  | H    | H1    | 10.82116 | 4.77901  | 9.19358  |
| 30  | H    | H2    | 8.81973  | 3.33598  | 9.06069  |
| 31  | H    | H3    | 6.55326  | 4.34065  | 9.10541  |
| 32  | H    | H4    | 6.28998  | 6.79890  | 9.29060  |
| 33  | H    | H5    | 8.27260  | 8.25332  | 9.42778  |
| 34  | H    | H6    | 5.75233  | 12.61777 | 9.23510  |
| 35  | H    | H7    | 9.60721  | 14.55807 | 9.10654  |
| 36  | H    | H8    | 8.49856  | 16.71426 | 8.70195  |
| 37  | H    | H9    | 6.02750  | 16.84576 | 8.56109  |
| 38  | H    | H10   | 4.65942  | 14.79587 | 8.83106  |
| 39  | H    | H11   | 15.30774 | 9.90904  | 9.17889  |
| 40  | H    | H12   | 17.72418 | 9.59395  | 8.85471  |
| 41  | H    | H13   | 19.23738 | 11.55259 | 8.73158  |
| 42  | H    | H14   | 18.31707 | 13.84523 | 8.93696  |
| 43  | H    | H15   | 15.89127 | 14.18617 | 9.25986  |
| 44  | N    | N1    | 11.16486 | 10.40903 | 11.45268 |
| 45  | N    | N2    | 10.90849 | 11.66619 | 12.02425 |
| 46  | H    | H16   | 10.92627 | 11.56970 | 13.06623 |
| 47  | H    | H17   | 10.38676 | 9.76090  | 11.71427 |
| 48  | H    | H18   | 11.67559 | 12.31699 | 11.74245 |
| 49  | H    | H19   | 12.07902 | 10.04248 | 11.80642 |

Table S8. Optimized coordinates of \*NH<sub>2</sub>NH<sub>2</sub>.



| No. | Atom | Label | x        | y        | z        |
|-----|------|-------|----------|----------|----------|
| 1   | V    | V1    | 12.14316 | 11.85843 | 8.94865  |
| 2   | O    | O1    | 13.59463 | 12.80180 | 8.37490  |
| 3   | O    | O2    | 10.51846 | 12.59030 | 8.47875  |
| 4   | O    | O3    | 12.17070 | 10.08963 | 8.55034  |
| 5   | P    | P1    | 14.46376 | 13.84118 | 9.31186  |
| 6   | P    | P2    | 12.29129 | 8.80139  | 9.57544  |
| 7   | P    | P3    | 9.25844  | 12.79713 | 9.50749  |
| 8   | O    | O4    | 14.15458 | 15.31632 | 9.15551  |
| 9   | O    | O5    | 13.55021 | 7.97075  | 9.44121  |
| 10  | O    | O6    | 8.20152  | 11.70731 | 9.51856  |
| 11  | C    | C1    | 16.19354 | 13.38222 | 9.03047  |
| 12  | C    | C2    | 17.15226 | 14.41195 | 9.02520  |
| 13  | C    | C3    | 16.58725 | 12.03366 | 8.96193  |
| 14  | C    | C4    | 18.50832 | 14.08791 | 8.92082  |
| 15  | C    | C5    | 17.94663 | 11.72144 | 8.86386  |
| 16  | C    | C6    | 18.90520 | 12.74577 | 8.84217  |
| 17  | C    | C7    | 10.74262 | 7.89270  | 9.31988  |
| 18  | C    | C8    | 9.50808  | 8.56612  | 9.29897  |
| 19  | C    | C9    | 10.79858 | 6.48839  | 9.25161  |
| 20  | C    | C10   | 8.32700  | 7.82490  | 9.18501  |
| 21  | C    | C11   | 8.37771  | 6.42604  | 9.10044  |
| 22  | C    | C12   | 9.61051  | 5.75918  | 9.13014  |
| 23  | C    | C13   | 8.63256  | 14.44677 | 9.10861  |
| 24  | C    | C14   | 7.24185  | 14.64433 | 9.08611  |
| 25  | C    | C15   | 9.51787  | 15.52352 | 8.92536  |
| 26  | C    | C16   | 6.73492  | 15.92239 | 8.83463  |
| 27  | C    | C17   | 7.61182  | 16.99704 | 8.62919  |
| 28  | C    | C18   | 8.99997  | 16.79980 | 8.68537  |
| 29  | H    | H1    | 11.77241 | 5.98757  | 9.27520  |
| 30  | H    | H2    | 9.64629  | 4.66501  | 9.05376  |
| 31  | H    | H3    | 7.44799  | 5.85118  | 9.00789  |
| 32  | H    | H4    | 7.36499  | 8.35080  | 9.16027  |
| 33  | H    | H5    | 9.44762  | 9.65818  | 9.36559  |
| 34  | H    | H6    | 6.58236  | 13.78372 | 9.24608  |
| 35  | H    | H7    | 10.60119 | 15.35865 | 8.96285  |
| 36  | H    | H8    | 9.68528  | 17.64380 | 8.54378  |
| 37  | H    | H9    | 7.21373  | 17.99869 | 8.42880  |
| 38  | H    | H10   | 5.64955  | 16.07743 | 8.79941  |
| 39  | H    | H11   | 15.83399 | 11.23688 | 8.97814  |
| 40  | H    | H12   | 18.25868 | 10.67191 | 8.80494  |
| 41  | H    | H13   | 19.96961 | 12.49294 | 8.76943  |
| 42  | H    | H14   | 19.25762 | 14.88867 | 8.89772  |
| 43  | H    | H15   | 16.81619 | 15.45308 | 9.08462  |
| 44  | N    | N1    | 12.17063 | 11.96592 | 10.59369 |
| 45  | N    | N2    | 12.23527 | 12.06577 | 11.92880 |
| 46  | H    | H16   | 11.40193 | 11.68368 | 12.40264 |
| 47  | H    | H17   | 12.49726 | 13.01261 | 12.24658 |

**Table S9.** Optimized coordinates of \*NNH<sub>2</sub>.

| No. | Atom | Label | x        | y        | z        |
|-----|------|-------|----------|----------|----------|
| 1   | V    | V1    | 11.16627 | 10.73557 | 9.08938  |
| 2   | O    | O1    | 12.96590 | 11.12350 | 8.39422  |
| 3   | O    | O2    | 9.93015  | 12.13837 | 8.47638  |
| 4   | O    | O3    | 10.56864 | 9.00566  | 8.35844  |
| 5   | P    | P1    | 13.48934 | 12.54075 | 9.25282  |
| 6   | P    | P2    | 11.22365 | 7.79693  | 9.42151  |
| 7   | P    | P3    | 8.42186  | 11.78402 | 9.26433  |
| 8   | O    | O4    | 13.44086 | 13.53550 | 7.83027  |
| 9   | O    | O5    | 12.07060 | 7.01361  | 8.12308  |
| 10  | O    | O6    | 7.70617  | 11.12259 | 7.82690  |
| 11  | C    | C1    | 15.29581 | 12.17714 | 9.12952  |
| 12  | C    | C2    | 16.21170 | 13.23876 | 9.08692  |
| 13  | C    | C3    | 15.77097 | 10.85522 | 9.09111  |
| 14  | C    | C4    | 17.58377 | 12.98322 | 8.99670  |
| 15  | C    | C5    | 17.14354 | 10.60337 | 9.00093  |
| 16  | C    | C6    | 18.04934 | 11.66628 | 8.95218  |
| 17  | C    | C7    | 9.73696  | 6.70659  | 9.34559  |
| 18  | C    | C8    | 8.44739  | 7.25991  | 9.39238  |
| 19  | C    | C9    | 9.88718  | 5.31452  | 9.25399  |
| 20  | C    | C10   | 7.32324  | 6.43017  | 9.33687  |
| 21  | C    | C11   | 7.47958  | 5.04480  | 9.23879  |
| 22  | C    | C12   | 8.76073  | 4.48730  | 9.19911  |
| 23  | C    | C13   | 7.68392  | 13.46321 | 9.04383  |
| 24  | C    | C14   | 6.28885  | 13.59661 | 8.98369  |
| 25  | C    | C15   | 8.49014  | 14.61067 | 8.94884  |
| 26  | C    | C16   | 5.70685  | 14.85785 | 8.82085  |
| 27  | C    | C17   | 6.51437  | 15.99391 | 8.72071  |
| 28  | C    | C18   | 7.90467  | 15.87027 | 8.78626  |
| 29  | H    | H1    | 10.87374 | 4.86992  | 9.22462  |
| 30  | H    | H2    | 8.88105  | 3.41415  | 9.12608  |
| 31  | H    | H3    | 6.60862  | 4.40374  | 9.19567  |
| 32  | H    | H4    | 6.33103  | 6.86136  | 9.37041  |
| 33  | H    | H5    | 8.31025  | 8.33073  | 9.47148  |
| 34  | H    | H6    | 5.65282  | 12.72383 | 9.06131  |
| 35  | H    | H7    | 9.56812  | 14.53970 | 9.00229  |
| 36  | H    | H8    | 8.52953  | 16.75096 | 8.71210  |
| 37  | H    | H9    | 6.06334  | 16.96966 | 8.59461  |
| 38  | H    | H10   | 4.62990  | 14.95452 | 8.77254  |
| 39  | H    | H11   | 15.08724 | 10.01784 | 9.13263  |
| 40  | H    | H12   | 17.50478 | 9.58352  | 8.96973  |
| 41  | H    | H13   | 19.11126 | 11.46929 | 8.88218  |
| 42  | H    | H14   | 18.28602 | 13.80605 | 8.96154  |
| 43  | H    | H15   | 15.86301 | 14.26317 | 9.12190  |
| 44  | N    | N1    | 11.19289 | 10.69579 | 10.80031 |

**Table S10.** Optimized coordinates of \*N.

| No. | Atom | Label | x        | y        | z        |
|-----|------|-------|----------|----------|----------|
| 1   | V    | V1    | 11.16071 | 10.71763 | 9.15526  |
| 2   | O    | O1    | 12.97824 | 11.04861 | 8.47746  |
| 3   | O    | O2    | 9.97096  | 12.16997 | 8.56967  |
| 4   | O    | O3    | 10.50299 | 9.02261  | 8.39947  |
| 5   | P    | P1    | 13.47945 | 12.52881 | 9.23669  |
| 6   | P    | P2    | 11.18785 | 7.77962  | 9.40105  |
| 7   | P    | P3    | 8.44033  | 11.80757 | 9.30812  |
| 8   | O    | O4    | 13.42941 | 13.42785 | 7.75188  |
| 9   | O    | O5    | 11.98317 | 7.03083  | 8.05073  |
| 10  | O    | O6    | 7.76837  | 11.14477 | 7.85071  |
| 11  | C    | C1    | 15.29416 | 12.19115 | 9.15184  |
| 12  | C    | C2    | 16.19026 | 13.26913 | 9.09837  |
| 13  | C    | C3    | 15.79603 | 10.87813 | 9.15288  |
| 14  | C    | C4    | 17.56849 | 13.03914 | 9.03694  |
| 15  | C    | C5    | 17.17501 | 10.65190 | 9.09155  |
| 16  | C    | C6    | 18.06060 | 11.73122 | 9.03223  |
| 17  | C    | C7    | 9.69731  | 6.69283  | 9.34775  |
| 18  | C    | C8    | 8.40793  | 7.24480  | 9.41897  |
| 19  | C    | C9    | 9.84709  | 5.30134  | 9.24943  |
| 20  | C    | C10   | 7.28381  | 6.41362  | 9.38132  |
| 21  | C    | C11   | 7.43998  | 5.02864  | 9.27672  |
| 22  | C    | C12   | 8.72088  | 4.47288  | 9.21234  |
| 23  | C    | C13   | 7.69437  | 13.48067 | 9.07049  |
| 24  | C    | C14   | 6.29859  | 13.60265 | 9.00419  |
| 25  | C    | C15   | 8.49210  | 14.63353 | 8.96855  |
| 26  | C    | C16   | 5.70715  | 14.85768 | 8.82891  |
| 27  | C    | C17   | 6.50601  | 15.99923 | 8.72245  |
| 28  | C    | C18   | 7.89709  | 15.88711 | 8.79364  |
| 29  | H    | H1    | 10.83376 | 4.85844  | 9.20101  |
| 30  | H    | H2    | 8.84131  | 3.40010  | 9.13423  |
| 31  | H    | H3    | 6.56915  | 4.38644  | 9.24780  |
| 32  | H    | H4    | 6.29169  | 6.84323  | 9.43410  |
| 33  | H    | H5    | 8.27020  | 8.31508  | 9.50387  |
| 34  | H    | H6    | 5.66930  | 12.72539 | 9.08669  |
| 35  | H    | H7    | 9.57039  | 14.57218 | 9.02618  |
| 36  | H    | H8    | 8.51508  | 16.77222 | 8.71453  |
| 37  | H    | H9    | 6.04753  | 16.97030 | 8.58713  |
| 38  | H    | H10   | 4.62964  | 14.94515 | 8.77616  |
| 39  | H    | H11   | 15.12961 | 10.02761 | 9.20337  |
| 40  | H    | H12   | 17.55721 | 9.63913  | 9.09118  |
| 41  | H    | H13   | 19.12742 | 11.55407 | 8.98483  |
| 42  | H    | H14   | 18.25496 | 13.87485 | 8.99342  |
| 43  | H    | H15   | 15.82106 | 14.28698 | 9.10253  |
| 44  | N    | N1    | 11.17754 | 10.64098 | 11.00133 |
| 45  | H    | H16   | 12.06017 | 10.76565 | 11.51548 |

**Table S11.** Optimized coordinates of \*NH.

| No. | Atom | Label | x        | y        | z        |
|-----|------|-------|----------|----------|----------|
| 1   | V    | V1    | 11.07710 | 10.69307 | 8.78411  |
| 2   | O    | O1    | 12.62571 | 11.61829 | 8.43258  |
| 3   | O    | O2    | 9.55501  | 11.63705 | 8.37292  |
| 4   | O    | O3    | 11.02394 | 8.93324  | 8.33795  |
| 5   | P    | P1    | 13.43743 | 12.63365 | 9.43206  |
| 6   | P    | P2    | 11.20232 | 7.64178  | 9.32078  |
| 7   | P    | P3    | 8.22294  | 11.74855 | 9.31720  |
| 8   | O    | O4    | 13.09935 | 14.10833 | 9.35289  |
| 9   | O    | O5    | 12.48120 | 6.84647  | 9.20614  |
| 10  | O    | O6    | 7.21080  | 10.62264 | 9.19416  |
| 11  | C    | C1    | 15.17549 | 12.21212 | 9.13905  |
| 12  | C    | C2    | 16.13051 | 13.24445 | 9.16042  |
| 13  | C    | C3    | 15.57462 | 10.87016 | 8.99919  |
| 14  | C    | C4    | 17.48480 | 12.92897 | 9.01623  |
| 15  | C    | C5    | 16.93304 | 10.56717 | 8.86497  |
| 16  | C    | C6    | 17.88718 | 11.59440 | 8.87384  |
| 17  | C    | C7    | 9.67526  | 6.68832  | 9.17817  |
| 18  | C    | C8    | 8.41798  | 7.31840  | 9.10429  |
| 19  | C    | C9    | 9.78511  | 5.28708  | 9.26863  |
| 20  | C    | C10   | 7.26575  | 6.52605  | 9.09259  |
| 21  | C    | C11   | 7.36927  | 5.12863  | 9.15503  |
| 22  | C    | C12   | 8.62428  | 4.50991  | 9.24390  |
| 23  | C    | C13   | 7.60020  | 13.41082 | 8.96828  |
| 24  | C    | C14   | 6.20918  | 13.60770 | 8.91419  |
| 25  | C    | C15   | 8.49052  | 14.49314 | 8.83930  |
| 26  | C    | C16   | 5.70900  | 14.89681 | 8.70670  |
| 27  | C    | C17   | 6.58944  | 15.97839 | 8.57597  |
| 28  | C    | C18   | 7.97542  | 15.77800 | 8.64044  |
| 29  | H    | H1    | 10.77811 | 4.82824  | 9.33775  |
| 30  | H    | H2    | 8.70079  | 3.41654  | 9.29516  |
| 31  | H    | H3    | 6.46224  | 4.51344  | 9.13673  |
| 32  | H    | H4    | 6.28068  | 7.00664  | 9.03724  |
| 33  | H    | H5    | 8.32669  | 8.41078  | 9.05288  |
| 34  | H    | H6    | 5.54018  | 12.74463 | 9.00651  |
| 35  | H    | H7    | 9.57371  | 14.32812 | 8.87911  |
| 36  | H    | H8    | 8.65997  | 16.62732 | 8.52781  |
| 37  | H    | H9    | 6.19281  | 16.98871 | 8.42220  |
| 38  | H    | H10   | 4.62610  | 15.05744 | 8.63877  |
| 39  | H    | H11   | 14.82507 | 10.07012 | 8.98372  |
| 40  | H    | H12   | 17.24903 | 9.52396  | 8.74755  |
| 41  | H    | H13   | 18.95126 | 11.35222 | 8.76865  |
| 42  | H    | H14   | 18.23217 | 13.73175 | 9.00869  |
| 43  | H    | H15   | 15.79500 | 14.28191 | 9.26807  |
| 44  | N    | N1    | 11.11529 | 10.59336 | 10.61800 |
| 45  | H    | H16   | 11.99025 | 10.63309 | 11.16786 |
| 46  | H    | H17   | 10.28064 | 10.56194 | 11.22748 |

**Table S12.** Optimized coordinates of \*NH<sub>2</sub>.

| No. | Atom | Label | x        | y        | z        |
|-----|------|-------|----------|----------|----------|
| 1   | V    | V1    | 11.07445 | 10.70020 | 8.88793  |
| 2   | O    | O1    | 12.86460 | 11.20014 | 8.24578  |
| 3   | O    | O2    | 9.77246  | 12.01821 | 8.22906  |
| 4   | O    | O3    | 10.61109 | 8.93400  | 8.15235  |
| 5   | P    | P1    | 13.34187 | 12.53642 | 9.24707  |
| 6   | P    | P2    | 11.25224 | 7.78554  | 9.28619  |
| 7   | P    | P3    | 8.32749  | 11.70812 | 9.14162  |
| 8   | O    | O4    | 13.33185 | 13.64097 | 7.90722  |
| 9   | O    | O5    | 12.06399 | 6.89889  | 8.03295  |
| 10  | O    | O6    | 7.49375  | 11.06987 | 7.75872  |
| 11  | C    | C1    | 15.15044 | 12.17943 | 9.15377  |
| 12  | C    | C2    | 16.06912 | 13.23833 | 9.09842  |
| 13  | C    | C3    | 15.62195 | 10.85643 | 9.15232  |
| 14  | C    | C4    | 17.44146 | 12.97746 | 9.03147  |
| 15  | C    | C5    | 16.99484 | 10.59900 | 9.08502  |
| 16  | C    | C6    | 17.90403 | 11.65858 | 9.02304  |
| 17  | C    | C7    | 9.73770  | 6.73142  | 9.30161  |
| 18  | C    | C8    | 8.46574  | 7.32151  | 9.37163  |
| 19  | C    | C9    | 9.84788  | 5.33312  | 9.25759  |
| 20  | C    | C10   | 7.31875  | 6.52185  | 9.38547  |
| 21  | C    | C11   | 7.43496  | 5.12998  | 9.33404  |
| 22  | C    | C12   | 8.69881  | 4.53605  | 9.27210  |
| 23  | C    | C13   | 7.64010  | 13.41301 | 8.97175  |
| 24  | C    | C14   | 6.25256  | 13.59558 | 8.87474  |
| 25  | C    | C15   | 8.48612  | 14.53435 | 8.95409  |
| 26  | C    | C16   | 5.71801  | 14.88184 | 8.75032  |
| 27  | C    | C17   | 6.56545  | 15.99297 | 8.72591  |
| 28  | C    | C18   | 7.94829  | 15.81926 | 8.82952  |
| 29  | H    | H1    | 10.82024 | 4.86004  | 9.21161  |
| 30  | H    | H2    | 8.78801  | 3.45796  | 9.23545  |
| 31  | H    | H3    | 6.54638  | 4.51194  | 9.34485  |
| 32  | H    | H4    | 6.34018  | 6.98114  | 9.43626  |
| 33  | H    | H5    | 8.36096  | 8.39791  | 9.41464  |
| 34  | H    | H6    | 5.58592  | 12.74285 | 8.89397  |
| 35  | H    | H7    | 9.55891  | 14.41934 | 9.03748  |
| 36  | H    | H8    | 8.60370  | 16.68034 | 8.81395  |
| 37  | H    | H9    | 6.15074  | 16.98813 | 8.62981  |
| 38  | H    | H10   | 4.64691  | 15.01726 | 8.67305  |
| 39  | H    | H11   | 14.93187 | 10.02426 | 9.20380  |
| 40  | H    | H12   | 17.35376 | 9.57797  | 9.08158  |
| 41  | H    | H13   | 18.96631 | 11.45774 | 8.97106  |
| 42  | H    | H14   | 18.14629 | 13.79765 | 8.98639  |
| 43  | H    | H15   | 15.72338 | 14.26414 | 9.10603  |
| 44  | N    | N1    | 11.04541 | 10.66501 | 10.94343 |
| 45  | H    | H16   | 11.94714 | 10.27782 | 11.30037 |
| 46  | H    | H17   | 10.25563 | 10.06732 | 11.27439 |
| 47  | H    | H18   | 10.91838 | 11.63566 | 11.30690 |

**Table S13.** Optimized coordinates of \*NH<sub>3</sub>.

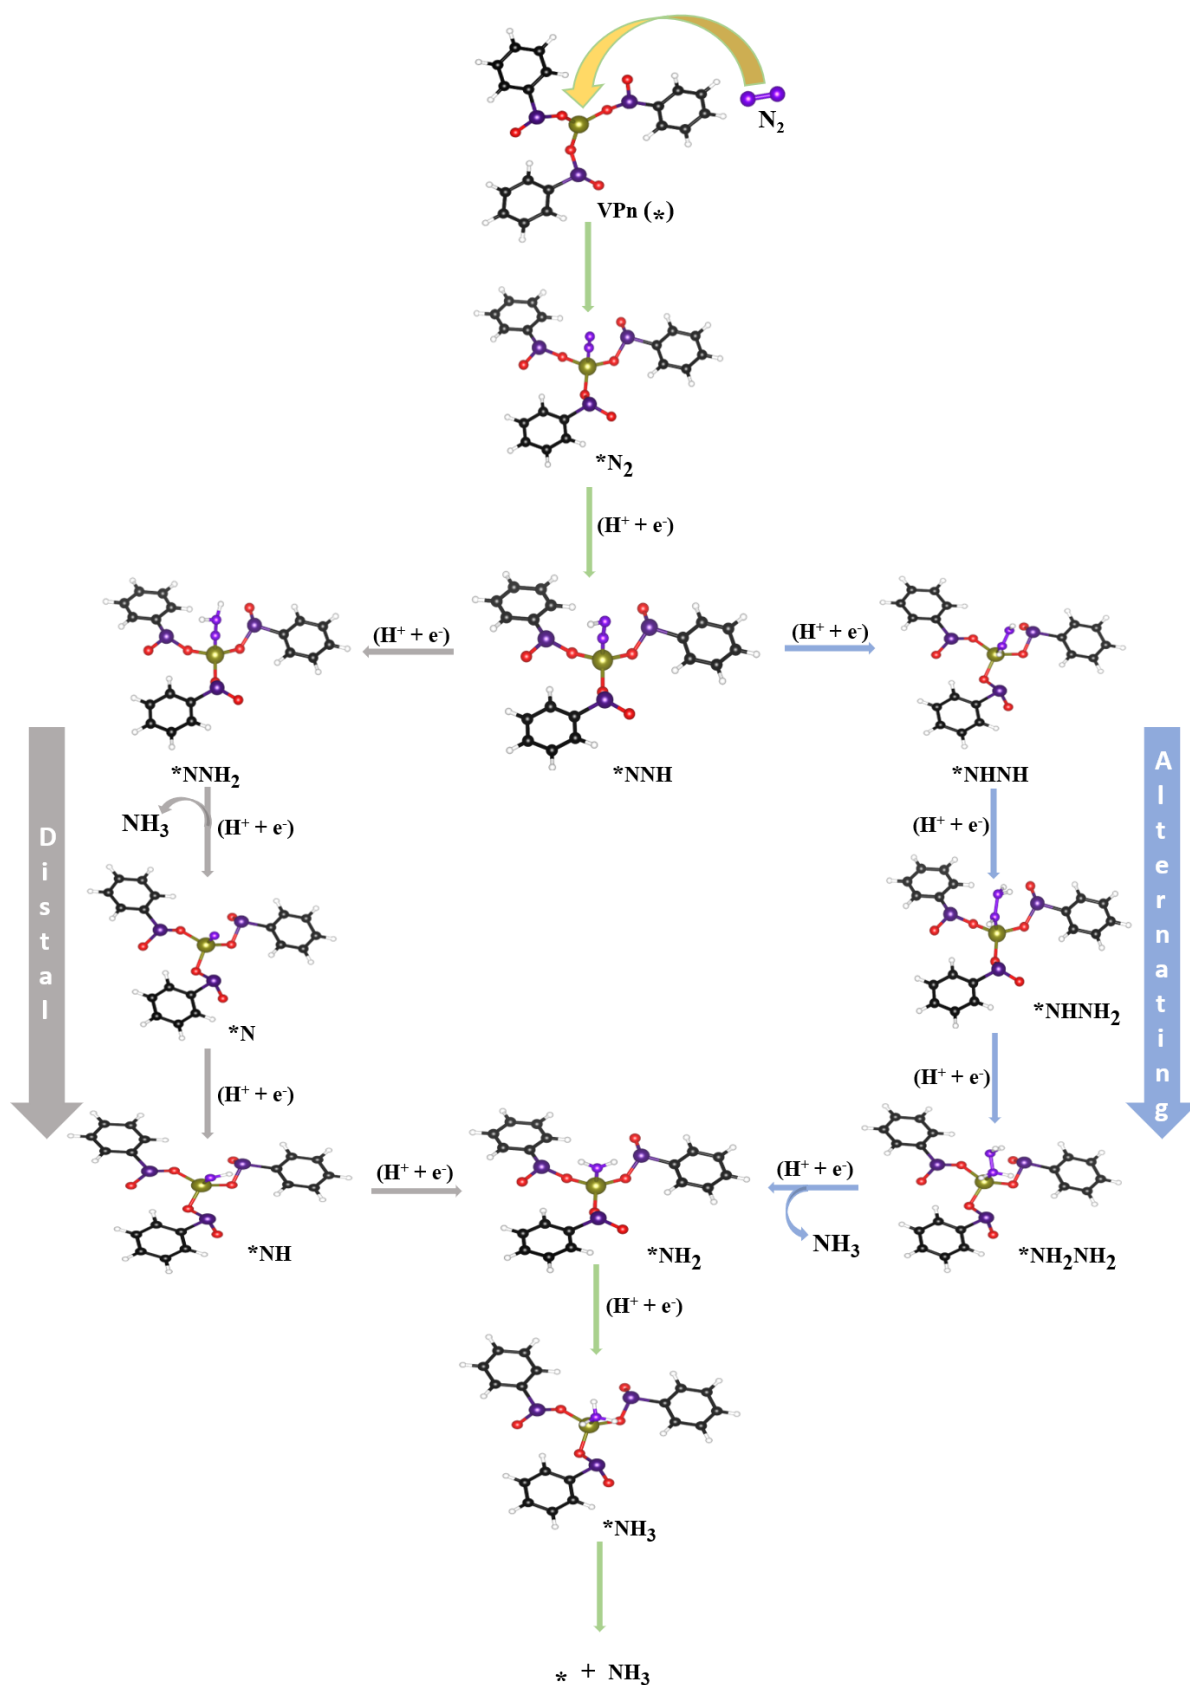

**Figure S29.** Schematic diagram showing the two possible pathways (associative alternating and associative distal) involving all the DFT optimized structures for the electrochemical NRR over VPn catalyst.

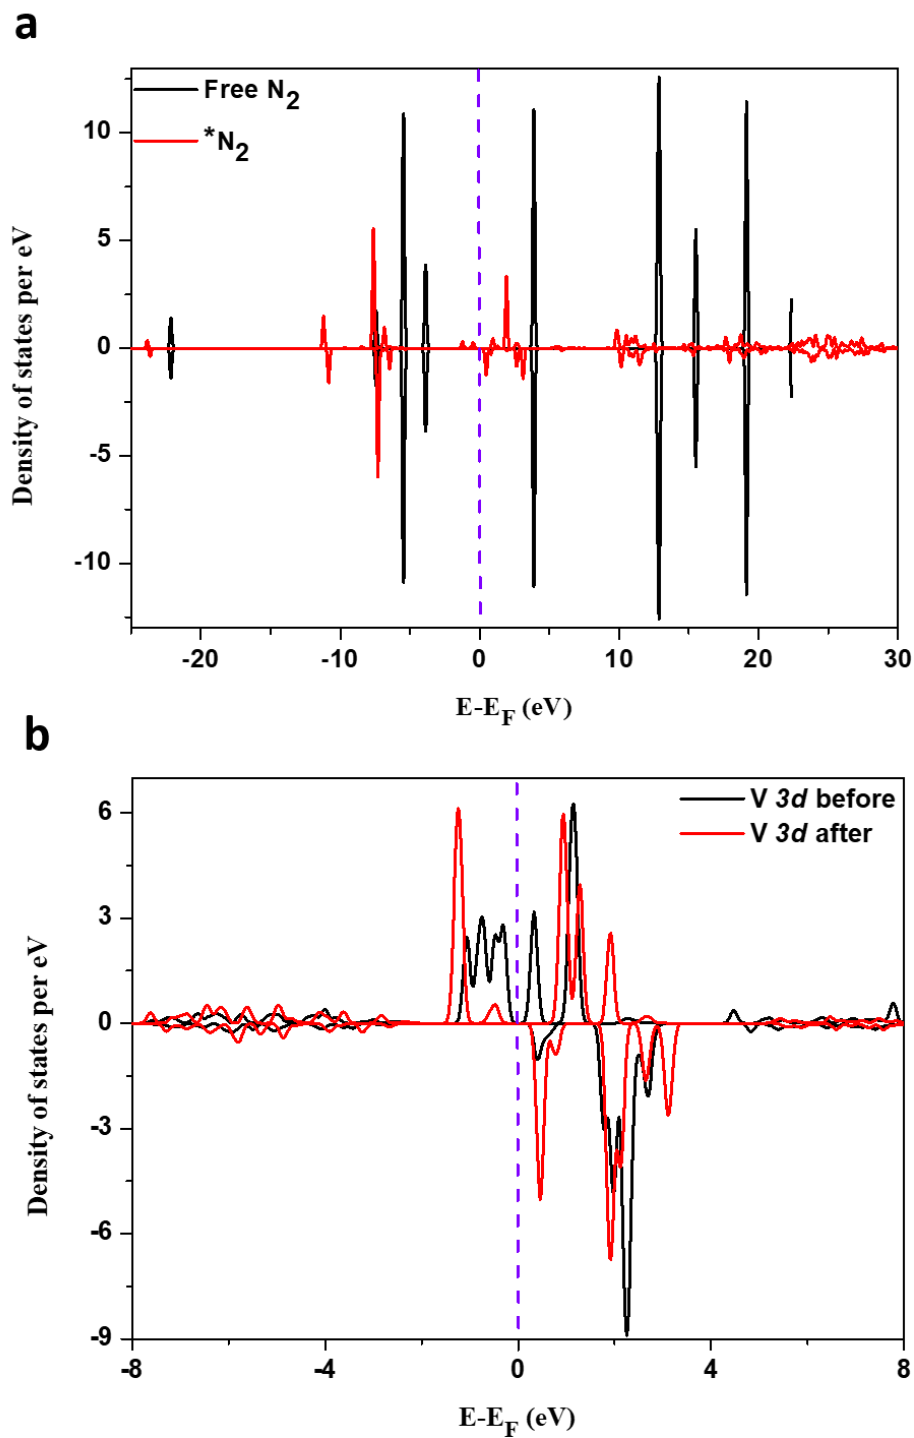

**Figure S30.** Projected density of states (PDOS) of (a)  $\text{N}_2$  and (b) V 3d orbitals before and after  $\text{N}_2$  adsorption near the Fermi level. The Fermi level is set to zero.

## **Importance and performance of the vanadium phosphonate with respect to the vanadium oxides, phosphides, and sulfides:**

Vanadium-based complexes,<sup>14</sup> oxides,<sup>15-21</sup> phosphides,<sup>22,23</sup> sulfides,<sup>24-27</sup> carbides,<sup>28,29</sup> and nitrides<sup>30</sup> are also active in the electrocatalysis of the NRR. The current efficiency for these catalysts is, however, of lower value. For example, transition-metal oxides (TMOs) were typically recognized as NRR active materials due to their improper hydrogen adsorption energy. Meanwhile, the poor conductivity and electron-rich surface of TMOs hinder N<sub>2</sub> adsorption and enhance energy consumption. Hence, the NRR application of TMOs is substantially hampered by these problems.<sup>31</sup> Also, V<sub>2</sub>O<sub>3</sub> is less poisonous amid various vanadium oxides, but its inherent low electrical conductivity is detrimental to its electrochemical performance towards NRR.<sup>32</sup>

Recent theoretical calculations and experimental observations indicate that transition-metal nitrides (TMNs) are viable NRR electrocatalysts under ambient atmospheres via a Mars-van Krevelen mechanism. Although TMNs have superior chemical stability and conductivity than comparable TMOs, they are also more likely to suffer HER side effects.<sup>31</sup> Vanadium nitride (VN) is active for electrochemical NRR. However, such nitride suffers from using NH<sub>3</sub> as an N source for catalyst preparation. In addition to that, the application of VN in electrochemical systems may be constrained by the leaching phenomenon inside the electrolyte solution, especially for the electrochemical ammonia synthesis by NRR, where the retention of catalytic activity and selectivity of the catalysts persist as significant challenges.<sup>33</sup> Also, the employment of TMNs towards NRR suffers from the use of N-containing precursors and the deactivation of surface active sites on the catalysts.<sup>34</sup> So, research interests have focused on developing a unique species transition-metal oxynitride (TMON) that may resolve all of the abovementioned problems by combining the beneficial attributes of both TMOs with TMNs. Xu and colleagues conducted the mechanistic investigation of NRR on vanadium nitride nanoparticles (VN NPs).



This study revealed the existence of numerous vanadium oxide, oxynitride, and nitride on the surface; among these, the vanadium oxynitride ( $\text{VN}_{0.7}\text{O}_{0.45}$ ) turned out to be an active phase for NRR. They hypothesized that conversion from  $\text{VN}_{0.7}\text{O}_{0.45}$  to VN would result in catalyst deactivation. Specifically, the surface oxygen underwent reductive leaching, followed by the adsorption and dissociation of  $\text{N}_2$  molecules to fill the vacancy, thus creating a fully clean VN surface that was inactive towards the NRR due to the tightly bound nitrogen atoms.<sup>35-37</sup>

Metal phosphide's surface has several coordinated unsaturated active sites that facilitate the bonding of nitrogen-related intermediates, making it a promising option for electrochemical NRR. The transition metal phosphide's electrochemical NRR performance and Faradaic efficiency can be increased by controlling its shape and doping. However, it is insufficient to meet the current needs of industrialization. Additionally, metal phosphides cannot be used in long-term electrocatalytic processes due to their low conductivity and stability, thus limiting their practical application.<sup>34</sup>

Transition metal carbides and sulfides can catalyse  $\text{N}_2$  electroreduction to ammonia at ambient temperatures. However, transition metal carbides and sulfides are extensively studied and established as electrocatalysts for hydrogen evolution. As a result, they do not appear to be suitable as electrocatalysts for  $\text{N}_2$  reduction.<sup>38</sup> Consequently, it is crucial to investigate novel, highly active vanadium-based NRR electrocatalysts.

In this work, we have synthesized and explored microporous vanadium phosphonate (VPn) as an electrocatalyst toward NRR, which stands out from other vanadium-based materials primarily due to their unique collaborative properties arising from their distinctive hybrid backbone. Such a new class of hybrid metal phosphonate can be considered as nanocomposites in which the organic and inorganic counterparts are interconnected, exhibiting the superior benefits of both the inorganic and organic skeletons. Microporous vanadium phosphonate possesses a reasonable surface area and tunable pore sizes, making them excellent candidates

for adsorption applications. Their microporous nature provides a large number of active sites for catalytic reactions, leading to their catalytic activity and selectivity towards NRR, owing to their accessibility to collaborate the benefits of both porous materials and periodic organic-inorganic skeleton architectures. After long-term stability, the post-NRR FESEM and TEM image analysis suggested that VPn exhibits retention of structural features. The post-NRR XRD, Raman, and XPS analysis reveal that the as-prepared VPn material possesses reasonable structural and chemical stability towards NRR. The electrochemical NRR performance of our as-prepared VPn material is comparable to other vanadium-based electrocatalyst, listed in Table S14.

**Table S14.** NRR performance of other vanadium-based electrocatalysts as compared to VPn.

| Material Type      | Electrocatalyst                                 | Yield Rate                                                        | FE (%) | Electrolyte                               | Reference |
|--------------------|-------------------------------------------------|-------------------------------------------------------------------|--------|-------------------------------------------|-----------|
| Vanadium oxide     | mVO <sub>x</sub> -rGO                           | 18.84<br>μg h <sup>-1</sup> mg <sub>cat.</sub> <sup>-1</sup>      | 16.97% | 0.1 M<br>Na <sub>2</sub> SO <sub>4</sub>  | 18        |
|                    | VO <sub>2</sub> @CN                             | 0.31<br>μmol h <sup>-1</sup> mg <sub>cat.</sub> <sup>-1</sup>     | 67.9%  | 0.1 M<br>Na <sub>2</sub> SO <sub>4</sub>  | 20        |
|                    | V <sub>2</sub> O <sub>4</sub> /rGO              | 24.75<br>μg h <sup>-1</sup> ·mg <sub>cat.</sub> <sup>-1</sup>     | 79%    | 0.1 M<br>Na <sub>2</sub> SO <sub>4</sub>  | 21        |
|                    | V <sub>2</sub> O <sub>3</sub> /C                | 12.3<br>μg h <sup>-1</sup> mg <sub>cat.</sub> <sup>-1</sup>       | 7.28%  | 0.1 M<br>Na <sub>2</sub> SO <sub>4</sub>  | 32        |
|                    | V <sub>2</sub> O <sub>3</sub>                   | 47.2<br>μg h <sup>-1</sup> mg <sub>cat.</sub> <sup>-1</sup>       | 12.5%  | 0.1 M<br>Na <sub>2</sub> SO <sub>4</sub>  | 39        |
|                    | V <sub>3</sub> O <sub>7</sub> ·H <sub>2</sub> O | 36.42<br>μg h <sup>-1</sup> ·mg <sup>-1</sup>                     | 14.20% | 0.1 M<br>Na <sub>2</sub> SO <sub>4</sub>  | 40        |
| Vanadium carbide   | V <sub>8</sub> C <sub>7</sub> /C                | 34.62<br>μg h <sup>-1</sup> ·mg <sub>cat.</sub> <sup>-1</sup>     | 12.20% | 0.1 M HCl                                 | 28        |
|                    | □ <sub>e</sub> -VC                              | 23.2<br>μg h <sup>-1</sup> ·mg <sub>cat.</sub> <sup>-1</sup>      | 18.3%  | 0.1 M HCl                                 | 29        |
| Vanadium sulfide   | 1-AAQ-PA-Fe-VS <sub>2</sub>                     | 31.6<br>μg h <sup>-1</sup> ·mg <sup>-1</sup>                      | 23.5 % | 0.05 M<br>Li <sub>2</sub> SO <sub>4</sub> | 24        |
|                    | VS <sub>4</sub> -140                            | 46.74<br>μg h <sup>-1</sup> mg <sub>cat.</sub> <sup>-1</sup>      | 8.5%   | 0.1 M<br>Na <sub>2</sub> SO <sub>4</sub>  | 25        |
|                    | VS <sub>2</sub> -350                            | 20.29<br>μg h <sup>-1</sup> mg <sub>cat.</sub> <sup>-1</sup>      | 3.86%  | 0.1 M HCl                                 | 26        |
|                    | Flower-like VS <sub>2</sub>                     | 34.62<br>μg h <sup>-1</sup> mg <sub>cat.</sub> <sup>-1</sup>      | 2.09%  | 0.1 M HCl                                 | 27        |
| Vanadium phosphide | VP/VF                                           | 8.35 × 10 <sup>-11</sup><br>mol·s <sup>-1</sup> ·cm <sup>-2</sup> | 22%    | 0.1 M HCl                                 | 22        |

|                         |                     |                                                                                                        |                          |                                   |                      |
|-------------------------|---------------------|--------------------------------------------------------------------------------------------------------|--------------------------|-----------------------------------|----------------------|
|                         | CoVP@NiF<br>eV-LDHs | $1.6 \times 10^{-6}$<br>$\text{mol h}^{-1} \text{cm}^{-2}$                                             | 13.8%                    | 0.05 M<br>$\text{H}_2\text{SO}_4$ | 23                   |
| Vanadium<br>phosphonate | VPn                 | 11.84<br>$\mu\text{g h}^{-1} \text{mg}_{\text{cat.}}^{-1}$<br>(Phenate method,<br>at -0.6 V)           | 40.63%<br>(at -<br>0.5V) | 0.1 M<br>$\text{Na}_2\text{SO}_4$ | <b>This<br/>work</b> |
|                         |                     | 11.2<br>$\mu\text{g h}^{-1} \text{mg}_{\text{cat.}}^{-1}$<br>(Indophenol blue<br>method,<br>at -0.6 V) | 36.56%<br>(at -<br>0.5V) |                                   |                      |

**Table S15.** Comparison table with reported NRR electrocatalyst.

| Sl<br>no. | Material                                         | yield rate<br>( $\mu\text{g h}^{-1} \text{mg}^{-1}$<br>$_{\text{cat}}$ ) | FE(%)               | Electrolyte                      | Reference |
|-----------|--------------------------------------------------|--------------------------------------------------------------------------|---------------------|----------------------------------|-----------|
| 1         | 1T'' MoS <sub>2</sub>                            | 9.09                                                                     | 13.6                | 0.1M<br>$\text{Na}_2\text{SO}_4$ | 41        |
| 2         | defect-rich fluorographene<br>nanosheet          | 9.3                                                                      | 4.2                 | 0.1M<br>$\text{Na}_2\text{SO}_4$ | 42        |
| 3         | ZrO <sub>2</sub>                                 | 9.63                                                                     | 12.1                | 0.1M<br>$\text{Na}_2\text{SO}_4$ | 43        |
| 4         | TiO <sub>2</sub> /CeO <sub>2</sub>               | 8.8                                                                      | 6.8                 | 0.1M<br>HCl                      | 44        |
| 5         | Cu SAs/TiO <sub>2</sub>                          | 6.26                                                                     | 12.88               | 0.5M<br>$\text{K}_2\text{SO}_4$  | 45        |
| 6         | HAT-700-A                                        | 5.86                                                                     | 11.40               | 0.1M<br>HCl                      | 46        |
| 7         | MoO <sub>2+x</sub>                               | 3.95                                                                     | 22.1                | 0.1M<br>KOH                      | 47        |
| 8         | Bi@C-900                                         | $4.22 \pm 0.33$                                                          | $15.10 \pm$<br>0.43 | 0.1M<br>$\text{Na}_2\text{SO}_4$ | 48        |
| 9         | Iso-e Si <sub>1.6</sub>                          | 3.68                                                                     | 5.02                | 0.05M<br>$\text{H}_2\text{SO}_4$ | 49        |
| 10        | Fe <sub>2</sub> (MoO <sub>4</sub> ) <sub>3</sub> | 7.5                                                                      | 1                   | 0.1M<br>$\text{Na}_2\text{SO}_4$ | 50        |
| 11        | Fe-NPC                                           | 4.36                                                                     | 5.30                | 0.1M<br>NaOH                     | 51        |
| 12        | Ni-NFV3                                          | 7.3                                                                      | 4.4                 | 0.1M<br>PBS                      | 52        |
| 13        | FeSC700                                          | $8.8 \pm 1.3$                                                            | $6.1 \pm 0.9$       | 0.1M<br>KOH                      | 53        |
| 14        | Fe-N/C-CPs                                       | 2.27                                                                     | 7.67                | 0.5M<br>$\text{K}_2\text{SO}_4$  | 54        |
| 15        | FePc/C                                           | 10.25                                                                    | 14.17               | 0.1M<br>$\text{Na}_2\text{SO}_4$ | 55        |

|    |                                                                                                                                              |                                                        |                             |                                      |           |
|----|----------------------------------------------------------------------------------------------------------------------------------------------|--------------------------------------------------------|-----------------------------|--------------------------------------|-----------|
| 16 | 3R MoS <sub>2</sub> -700                                                                                                                     | 8.8                                                    | 1.90                        | 0.1M Na <sub>2</sub> SO <sub>4</sub> | 56        |
| 17 | WS <sub>2</sub> /WO <sub>2</sub>                                                                                                             | 8.53                                                   | 13.50                       | 0.05M H <sub>2</sub> SO <sub>4</sub> | 57        |
| 18 | Pd-Ag-S PNSs                                                                                                                                 | 9.73                                                   | 18.41                       | 0.1M Na <sub>2</sub> SO <sub>4</sub> | 58        |
| 19 | Bi NSs                                                                                                                                       | 11.11                                                  | 14.14                       | 0.1M Na <sub>2</sub> SO <sub>4</sub> | 59        |
| 20 | Cu/AC-S                                                                                                                                      | 9.7                                                    | 15.9                        | 0.1M Na <sub>2</sub> SO <sub>4</sub> | 60        |
| 21 | NPC                                                                                                                                          | 0.97                                                   | 4.2                         | 0.1M HCl                             | 61        |
| 22 | RGO/WOCu                                                                                                                                     | 11.4                                                   | 4.4                         | 0.1M Na <sub>2</sub> SO <sub>4</sub> | 62        |
| 23 | Cu <sub>2</sub> SnS <sub>3</sub> -10                                                                                                         | 8.22                                                   | 8.87                        | 0.1M Na <sub>2</sub> SO <sub>4</sub> | 63        |
| 24 | KNC                                                                                                                                          | 6.67                                                   | 8.10                        | 0.1M Na <sub>2</sub> SO <sub>4</sub> | 64        |
| 25 | [(bpy) <sub>4</sub> Cu <sub>4</sub> (C <sub>10</sub> H <sub>8</sub> SO <sub>3</sub> ) <sub>4</sub> (OH) <sub>4</sub> ]<br>•4H <sub>2</sub> O | 2.18                                                   | 0.97                        | 0.1M Na <sub>2</sub> SO <sub>4</sub> | 65        |
| 26 | Li-TiO <sub>2</sub> (B)                                                                                                                      | 8.7                                                    | 18.2                        | 0.5M LiClO <sub>4</sub>              | 66        |
| 27 | La <sub>0.5</sub> Sr <sub>0.5</sub> FeO <sub>3-δ</sub><br>ceramic oxide                                                                      | 11.51                                                  | 0.54                        | 0.1M Na <sub>2</sub> SO <sub>4</sub> | 67        |
| 28 | RuAu <sub>3</sub> /0.3Zr-C <sub>3</sub> N <sub>4</sub>                                                                                       | 5.28                                                   | 11.54                       | 0.1M KOH                             | 68        |
| 29 | etched-PdZn/NHCP                                                                                                                             | 5.28                                                   | 16.9                        | 0.1M PBS                             | 69        |
| 30 | TiO <sub>2</sub> (V <sub>o</sub> )-800                                                                                                       | 3                                                      | 6.5                         | 0.1M HCl                             | 70        |
| 31 | NSG                                                                                                                                          | 7.7                                                    | 5.8                         | 0.1M HCl                             | 71        |
| 32 | VPn                                                                                                                                          | <b>11.84</b><br>(Phenate method)<br>(at -0.6 V)        | <b>40.63</b><br>(at -0.5 V) | 0.1M Na <sub>2</sub> SO <sub>4</sub> | This Work |
|    |                                                                                                                                              | <b>11.2</b><br>(Indophenol blue method)<br>(at -0.6 V) | <b>36.56</b><br>(at -0.5 V) |                                      |           |

## References:

- 1 H. L. Du, M. Chatti, R. Y. Hodgetts, P. V. Cherepanov, C. K. Nguyen, K. Matuszek, D. R. MacFarlane and A. N. Simonov, *Nature*, 2022, **609**, 722–727.
- 2 E. García-Robledo, A. Corzo and S. Papaspyrou, *Mar. Chem.*, 2014, **162**, 30–36.
- 3 B. H. R. Suryanto, K. Matuszek, J. Choi, R. Y. Hodgetts, H. L. Du, J. M. Bakker, C. S. M. Kang, P. V. Cherepanov, A. N. Simonov and D. R. MacFarlane, *Science (80-. )*, 2021, **372**, 1187–1191.
- 4 S. Smidstrup, T. Markussen, P. Vancraeyveld, J. Wellendorff, J. Schneider, T. Gunst, B. Verstichel, D. Stradi, P. A. Khomyakov, U. G. Vej-Hansen, M.-E. Lee, S. T. Chill, F. Rasmussen, G. Penazzi, F. Corsetti, A. Ojanperä, K. Jensen, M. L. N. Palsgaard, U. Martinez, A. Blom, M. Brandbyge and K. Stokbro, *J. Phys. Condens. Matter*, 2020, **32**, 015901.
- 5 J. P. Perdew, K. Burke and M. Ernzerhof, *Phys. Rev. Lett.*, 1996, **77**, 3865–3868.
- 6 S. Grimme, *J. Comput. Chem.*, 2006, **27**, 1787–1799.
- 7 H. J. Monkhorst and J. D. Pack, *Phys. Rev. B*, 1976, **13**, 5188–5192.
- 8 A. A. Peterson, F. Abild-Pedersen, F. Studt, J. Rossmeisl and J. K. Nørskov, *Energy Environ. Sci.*, 2010, **3**, 1311.
- 9 A. Altomare, N. Corriero, C. Cuocci, A. Falcicchio, A. Moliterni and R. Rizzi, *Cryst. Res. Technol.*, 2015, **50**, 737–742.
- 10 G. Lin, Q. Ju, X. Guo, W. Zhao, S. Adimi, J. Ye, Q. Bi, J. Wang, M. Yang and F. Huang, *Adv. Mater.*, , DOI:10.1002/adma.202007509.
- 11 R. I. Mohanty, S. Dash, A. Mukherjee, B. K. Jena, P. Bhanja and S. Basu, *Int. J. Hydrogen Energy*, 2024, **52**, 1550–1559.
- 12 H. Zhang, X. Xiao, X. Lu, G. Chai, Y. Sun, Y. Zhan and G. Xu, *J. Alloys Compd.*, 2015, **636**, 106–112.
- 13 E. Podstawka, A. Kudelski, P. Kafarski and L. M. Proniewicz, *Surf. Sci.*, 2007, **601**, 4586–4597.
- 14 P. Bhattacharya, D. E. Prokopchuk and M. T. Mock, *Coord. Chem. Rev.*, 2017, **334**, 67–83.
- 15 Y. Abghoui, A. L. Garden, J. G. Howalt, T. Vegge and E. Skúlason, *ACS Catal.*, 2016, **6**, 635–646.
- 16 Y. Sun, I. Sinev, W. Ju, A. Bergmann, S. Dresp, S. Kühn, C. Spöri, H. Schmies, H. Wang, D. Bernsmeier, B. Paul, R. Schmack, R. Kraehnert, B. Roldan Cuenya and P. Strasser, *ACS Catal.*, 2018, **8**, 2844–2856.
- 17 H. Ying, J. Bi, H. Xu, G. Wu, X. Wu, J. Hao and Z. Li, *ACS Sustain. Chem. Eng.*, 2022, **10**, 6766–6774.
- 18 W. Fang, J. Zhao, T. Wu, Y. Huang, L. Yang, C. Liu, Q. Zhang, K. Huang and Q. Yan, *J. Mater. Chem. A*, 2020, **8**, 5913–5918.
- 19 Y. Liu, X. Zhu, Q. Zhang, T. Tang, Y. Zhang, L. Gu, Y. Li, J. Bao, Z. Dai and J.-S. Hu, *J. Mater. Chem. A*, 2020, **8**, 8920–8926.
- 20 A. Chhetri, A. Biswas, S. Podder, R. S. Dey and J. Mitra, *Nanoscale*, , DOI:10.1039/D4NR00640B.
- 21 S. Chen, Y. Liang, M. Bu, Z. Dai and J. Shi, *Catal. Letters*, 2024, **154**, 1795–1805.
- 22 P. Wei, Q. Geng, A. I. Channa, X. Tong, Y. Luo, S. Lu, G. Chen, S. Gao, Z. Wang and X. Sun, *Nano Res.*, 2020, **13**, 2967–2972.
- 23 M. Arif, G. Yasin, L. Luo, W. Ye, M. A. Mushtaq, X. Fang, X. Xiang, S. Ji and D. Yan, *Appl. Catal. B Environ.*, 2020, **265**, 118559.
- 24 Z. Xiu, M. Zheng, J. Li, F. Wei, C. Dong, M. Zhang, X. Zhou and X. Han, *ChemSusChem*, , DOI:10.1002/cssc.202200741.

- 25 L. Yang, S. Wang, C. Qian and S. Zhou, *ACS Appl. Energy Mater.*, 2023, **6**, 8830–8837.
- 26 L. Zhao, Y. Xiong, X. Wang, R. Zhao, X. Chi, Y. Zhou, H. Wang, Z. Yang and Y. Yan, *Small*, , DOI:10.1002/smll.202106939.
- 27 L. Zhao, R. Zhao, Y. Zhou, X. Wang, X. Chi, Y. Xiong, C. Li, Y. Zhao, H. Wang, Z. Yang and Y.-M. Yan, *J. Mater. Chem. A*, 2021, **9**, 24985–24992.
- 28 J. Feng, X. Zhu, Q. Chen, W. Xiong, X. Chen, Y. Luo, A. A. Alshehri, K. A. Alzahrani, Z. Jiang and W. Li, *J. Mater. Chem. A*, 2019, **7**, 26227–26230.
- 29 C. Zhang, D. Wang, Y. Wan, R. Lv, S. Li, B. Li, X. Zou and S. Yang, *Mater. Today*, 2020, **40**, 18–25.
- 30 X. Yang, S. Kattel, J. Nash, X. Chang, J. H. Lee, Y. Yan, J. G. Chen and B. Xu, *Angew. Chemie Int. Ed.*, 2019, **58**, 13768–13772.
- 31 B. Chang, L. Deng, S. Wang, D. Shi, Z. Ai, H. Jiang, Y. Shao, L. Zhang, J. Shen, Y. Wu and X. Hao, *J. Mater. Chem. A*, 2020, **8**, 91–96.
- 32 R. Zhang, J. Han, B. Zheng, X. Shi, A. M. Asiri and X. Sun, *Inorg. Chem. Front.*, 2019, **6**, 391–395.
- 33 R. Manjunatha, A. Karajić, H. Teller, K. Nicoara and A. Schechter, *ChemCatChem*, 2020, **12**, 438–443.
- 34 J. Li, F. Wei, C. Dong, Z. Wang, Z. Xiu and X. Han, *Mater. Today Energy*, 2021, **21**, 100766.
- 35 X. Yang, J. Nash, J. Anibal, M. Dunwell, S. Kattel, E. Stavitski, K. Attenkofer, J. G. Chen, Y. Yan and B. Xu, *J. Am. Chem. Soc.*, 2018, **140**, 13387–13391.
- 36 W. Guo, K. Zhang, Z. Liang, R. Zou and Q. Xu, *Chem. Soc. Rev.*, 2019, **48**, 5658–5716.
- 37 S. B. Patil and D. Wang, *Small*, , DOI:10.1002/smll.202002885.
- 38 G. Qing, R. Ghazfar, S. T. Jackowski, F. Habibzadeh, M. M. Ashtiani, C.-P. Chen, M. R. Smith and T. W. Hamann, *Chem. Rev.*, 2020, **120**, 5437–5516.
- 39 N. Wang, Q.-S. Song, W.-J. Liu and J. Zhang, *Front. Energy Res.*, , DOI:10.3389/fenrg.2020.602438.
- 40 Y. Sun, S. Ding, C. Zhang, J. Duan and S. Chen, *J. Mater. Chem. A*, 2021, **9**, 1603–1609.
- 41 G. Lin, Q. Ju, X. Guo, W. Zhao, S. Adimi, J. Ye, Q. Bi, J. Wang, M. Yang and F. Huang, *Adv. Mater.*, 2021, **33**, 2007509.
- 42 J. Zhao, J. Yang, L. Ji, H. Wang, H. Chen, Z. Niu, Q. Liu, T. Li, G. Cui and X. Sun, *Chem. Commun.*, 2019, **55**, 4266–4269.
- 43 J. Xia, H. Guo, M. Cheng, C. Chen, M. Wang, Y. Xiang, T. Li and E. Traversa, *J. Mater. Chem. A*, 2021, **9**, 2145–2151.
- 44 B. Yan, S. Hu, C. Bu, Y. Peng, H. Han, X. Xu, Y. Liu, J. Yu and Y. Dai, *ChemCatChem*, , DOI:10.1002/cctc.202300076.
- 45 Z. Zhao, K. Li, J. Liu, J. Mao and Y. Lin, *Small*, , DOI:10.1002/smll.202206626.
- 46 W. Zhang, S. Zhan, Q. Qin, T. Heil, X. Liu, J. Hwang, T. H. Ferber, J. P. Hofmann and M. Oschatz, *Small*, , DOI:10.1002/smll.202204116.
- 47 J. Wang, Z. Jiang, G. Peng, E. Hoenig, G. Yan, M. Wang, Y. Liu, X. Du and C. Liu, *Adv. Sci.*, 2022, **9**, 1–8.
- 48 Y. Wan, H. Zhou, M. Zheng, Z. Huang, F. Kang, J. Li and R. Lv, *Adv. Funct. Mater.*, , DOI:10.1002/adfm.202100300.
- 49 G. Y. Zhai, D. Xu, S. N. Zhang, Z. H. Xue, H. Su, Q. Y. Yu, H. H. Wang, X. Lin, Y. X. Lin, L. H. Sun, X. H. Li and J. S. Chen, *Adv. Funct. Mater.*, 2020, **30**, 1–7.
- 50 C. Chen, Y. Liu and Y. Yao, *Eur. J. Inorg. Chem.*, 2020, **2020**, 3236–3241.
- 51 P. Song, H. Wang, X. Cao, N. Liu, Q. Wang and R. Wang, *ChemElectroChem*, 2020, **7**, 212–216.
- 52 F. Bai, X. Qu, C. Li, S. Liu, J. Sun, X. Chen and W. Yang, *ACS Appl. Mater. Interfaces*, 2022, **14**, 28033–28043.

- 53 M. I. Ahmed, L. J. Arachchige, Z. Su, D. B. Hibbert, C. Sun and C. Zhao, *ACS Catal.*, 2022, **12**, 1443–1451.
- 54 Y. Liu, Z. Zhao, W. Wei, X. Jin, G. Wang, K. Li and Y. Lin, *ACS Appl. Nano Mater.*, 2021, **4**, 13001–13009.
- 55 C. He, Z. Y. Wu, L. Zhao, M. Ming, Y. Zhang, Y. Yi and J. S. Hu, *ACS Catal.*, 2019, **9**, 7311–7317.
- 56 B. Fang, J. Yao, X. Zhang, L. Ma, Y. Ye, J. Tang, G. Zou, J. Zhang, L. Jiang and Y. Sun, *New J. Chem.*, 2021, **45**, 2488–2495.
- 57 Y. Ling, F. M. D. Kazim, S. Ma, Q. Zhang, K. Qu, Y. Wang, S. Xiao, W. Cai and Z. Yang, *J. Mater. Chem. A*, 2020, **8**, 12996–13003.
- 58 H. Wang, S. Liu, H. Zhang, S. Yin, Y. Xu, X. Li, Z. Wang and L. Wang, *Nanoscale*, 2020, **12**, 13507–13512.
- 59 Y. Xu, T. Ren, S. Yu, H. Yu, S. Yin, Z. Wang, X. Li, L. Wang and H. Wang, *Sustain. Energy Fuels*, 2020, **4**, 3334–3339.
- 60 S. Zhang, W. Li, Y. Liu, J. Wang, G. Wang, Y. Zhang, M. Han and H. Zhang, *Inorg. Chem. Front.*, 2019, **6**, 2832–2836.
- 61 P. Song, H. Wang, L. Kang, B. Ran, H. Song and R. Wang, *Chem. Commun.*, 2019, **55**, 687–690.
- 62 L. Hu, K. Liu, Y. Guo, J. Feng, X. Ding, W. Li, X. Su, M. Gao, Z. Li, H. Zhang, Y. Ren and T. Wei, *J. Colloid Interface Sci.*, 2023, **644**, 285–294.
- 63 X. He, Z. Ling, X. Peng, X. Yang, L. Ma and S. Lu, *Electrochem. commun.*, 2023, **148**, 107441.
- 64 L. Zhang, H. Shoushuang, J. Bao, L. Liu, T. Ye, X. Cong, K. Uvdal and Z. Hu, *J. Alloys Compd.*, 2022, **910**, 164759.
- 65 W. Wang, J. Z. Li, S. J. Luo, Z. X. Yao and K. G. Liu, *Inorganica Chim. Acta*, 2022, **534**, 120809.
- 66 R. Zhao, G. Wang, Y. Mao, X. Bao, Z. Wang, P. Wang, Y. Liu, Z. Zheng, Y. Dai, H. Cheng and B. Huang, *Chem. Eng. J.*, 2022, **430**, 133085.
- 67 Y. Xu, X. Xu, N. Cao, X. Wang, X. Liu, M. Fronzi and L. Bi, *Int. J. Hydrogen Energy*, 2021, **46**, 10293–10302.
- 68 W. Lin, S. Yao, H. Chen, S. Li, Y. Xia, Y. Yao, J. Li, D. Cheng and J. Fu, *J. Energy Chem.*, 2020, **53**, 109–115.
- 69 M. Ma, X. Han, H. Li, X. Zhang, Z. Zheng, L. Zhou, J. Zheng, Z. Xie, Q. Kuang and L. Zheng, *Appl. Catal. B Environ.*, 2020, **265**, 118568.
- 70 Z. Han, C. Choi, S. Hong, T. S. Wu, Y. L. Soo, Y. Jung, J. Qiu and Z. Sun, *Appl. Catal. B Environ.*, , DOI:10.1016/j.apcatb.2019.117896.
- 71 Y. Tian, D. Xu, K. Chu, Z. Wei and W. Liu, *J. Mater. Sci.*, 2019, **54**, 9088–9097.
